# Supplementary material
Source: publisher figshare collection journal article supplement (https://acs.figshare.com/ndownloader/files/10120137)

# **Regioselective Halogenation of Arenes and Heterocycles in Hexafluoroisopropanol**

Ren-Jin Tang, Thierry Milcent, Benoit Crousse\*

Faculty of Pharmacy, Fluorinated Molecules and Medicinal Chemistry UMR 8076, BioCIS, Univ.

Paris-Sud, CNRS, Université Paris-Saclay, 92290, Châtenay-Malabry, FRANCE

## **Table of Contents**

|          |                                                                                |            |
|----------|--------------------------------------------------------------------------------|------------|
| <b>1</b> | <b><sup>1</sup>H NMR titration of a mixture of HFIP and NBS</b>                | <b>S2</b>  |
| <b>2</b> | <b><sup>1</sup>H NMR and <sup>13</sup>C NMR Spectral for Purified Products</b> | <b>S3</b>  |
| <b>3</b> | <b>Spectral for Yield of Products Determined by <sup>1</sup>H NMR</b>          | <b>S60</b> |

## 1. $^1\text{H}$ NMR titration of a mixture of HFIP and NBS <sup>a</sup>

In the NMR tube, different amounts of NBS (**2a**) were dissolved in 1.0 mmol of HFIP, containing a capillary with  $\text{C}_6\text{D}_6$  (external standard). Then, the NMR spectra (1-5) were measured. A downfield shift of the OH proton ( $\text{H}_x$ ) of HFIP was observed with increasing concentrations of NBS.

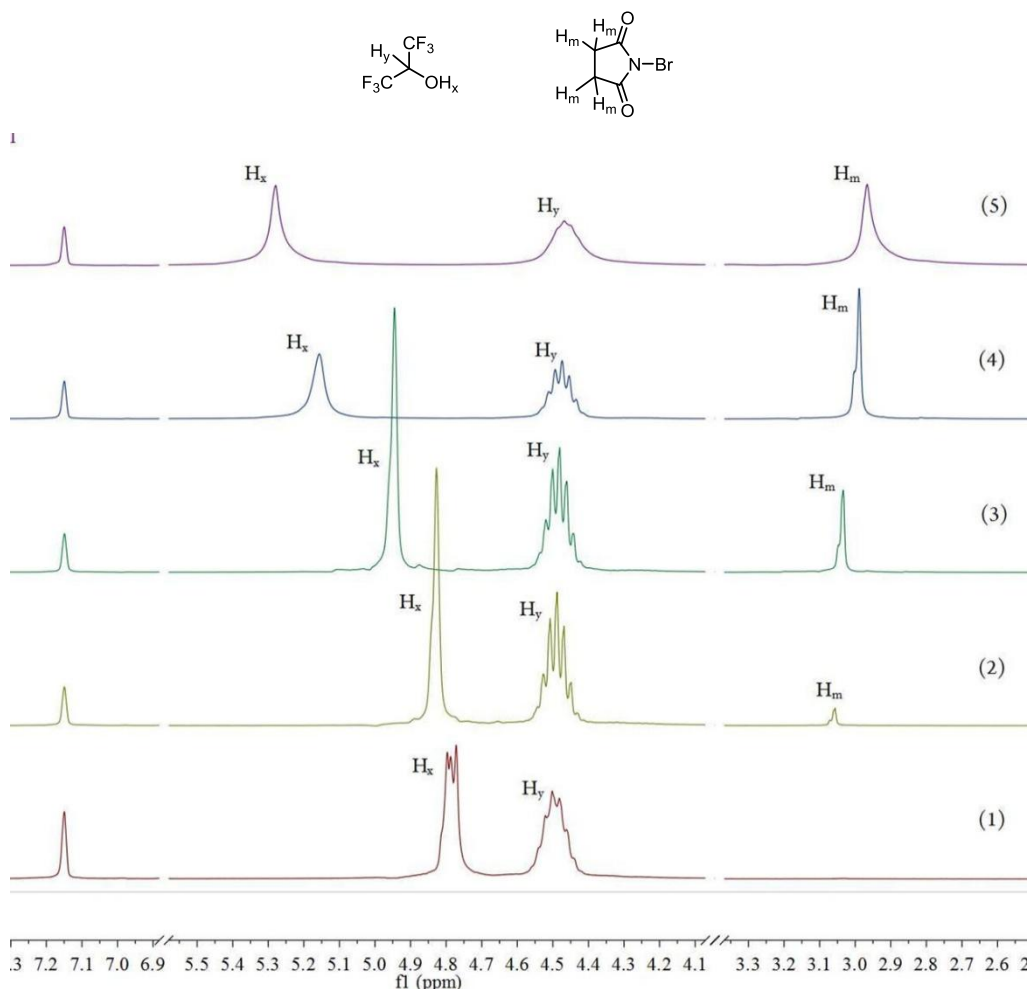

<sup>a</sup> Spectra were acquired in the presence of the following quantities of NBS: (1) 0 mol%; (2) 1 mol%; (3) 5 mol%; (4) 20 mol%; (5) 20 - 50 mol% (because 50% of NBS can not be completely dissolved in HFIP).

# 1. $^1\text{H}$ NMR and $^{13}\text{C}$ NMR spectral for Purified Products:

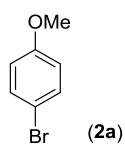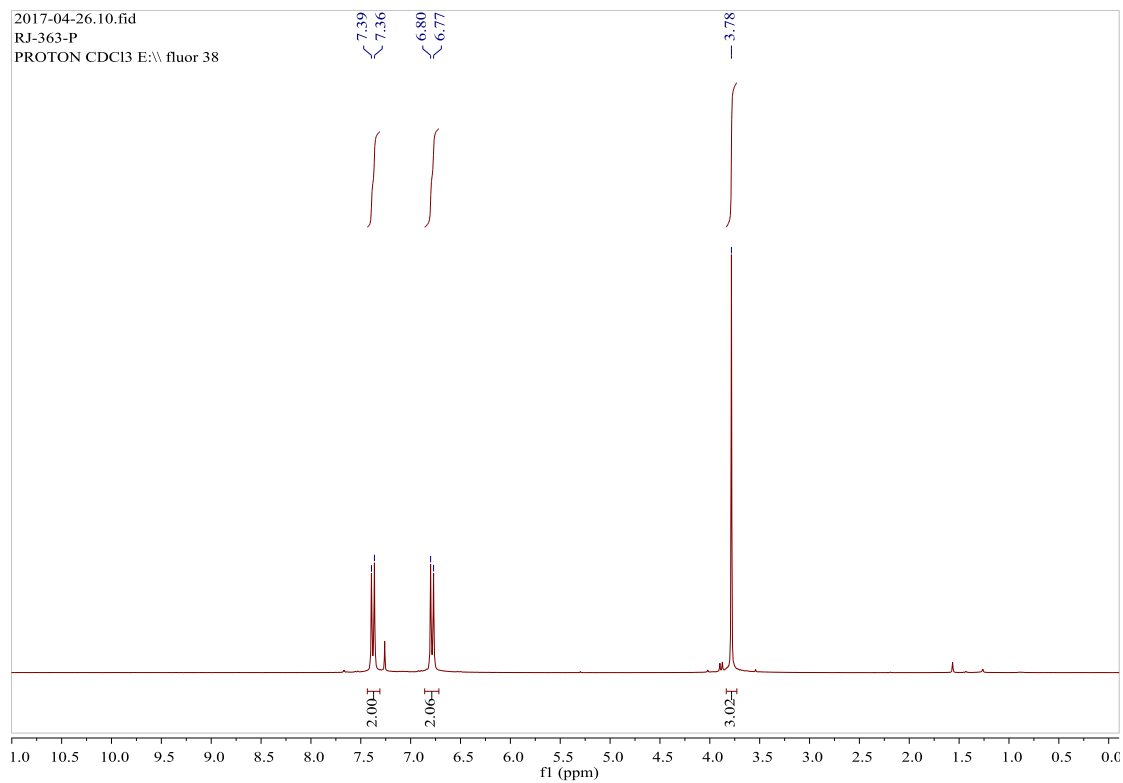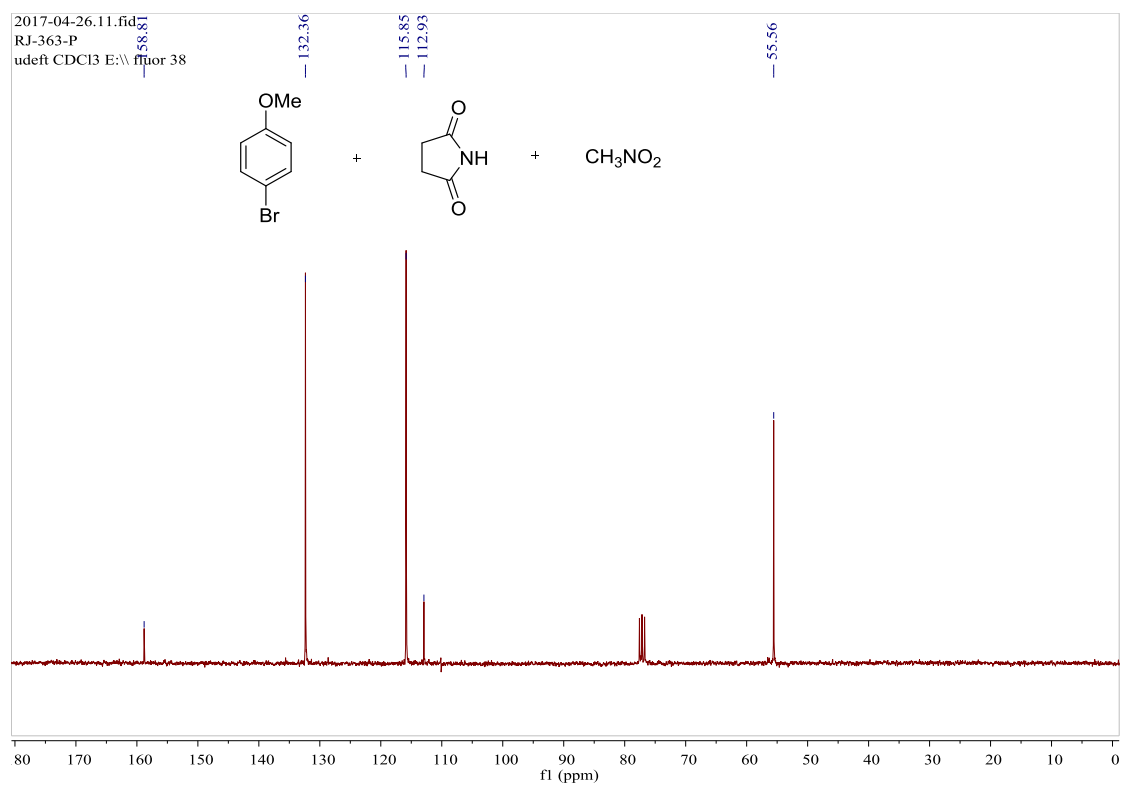

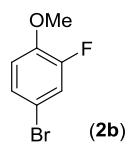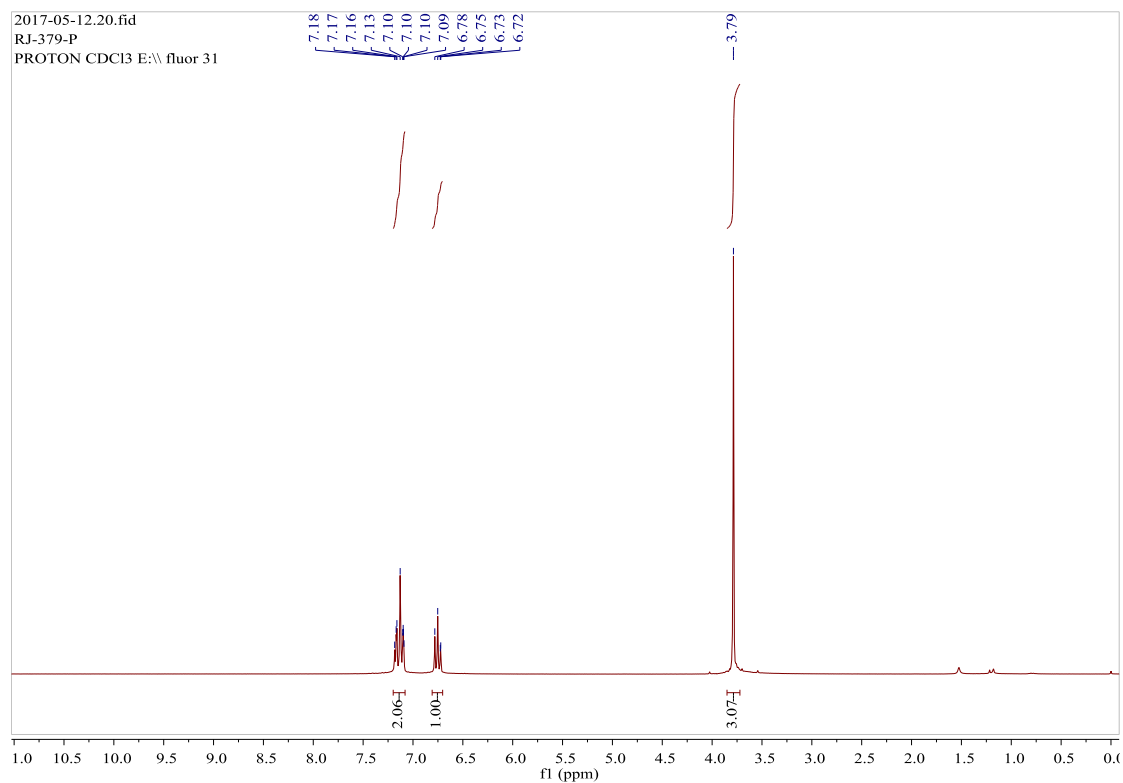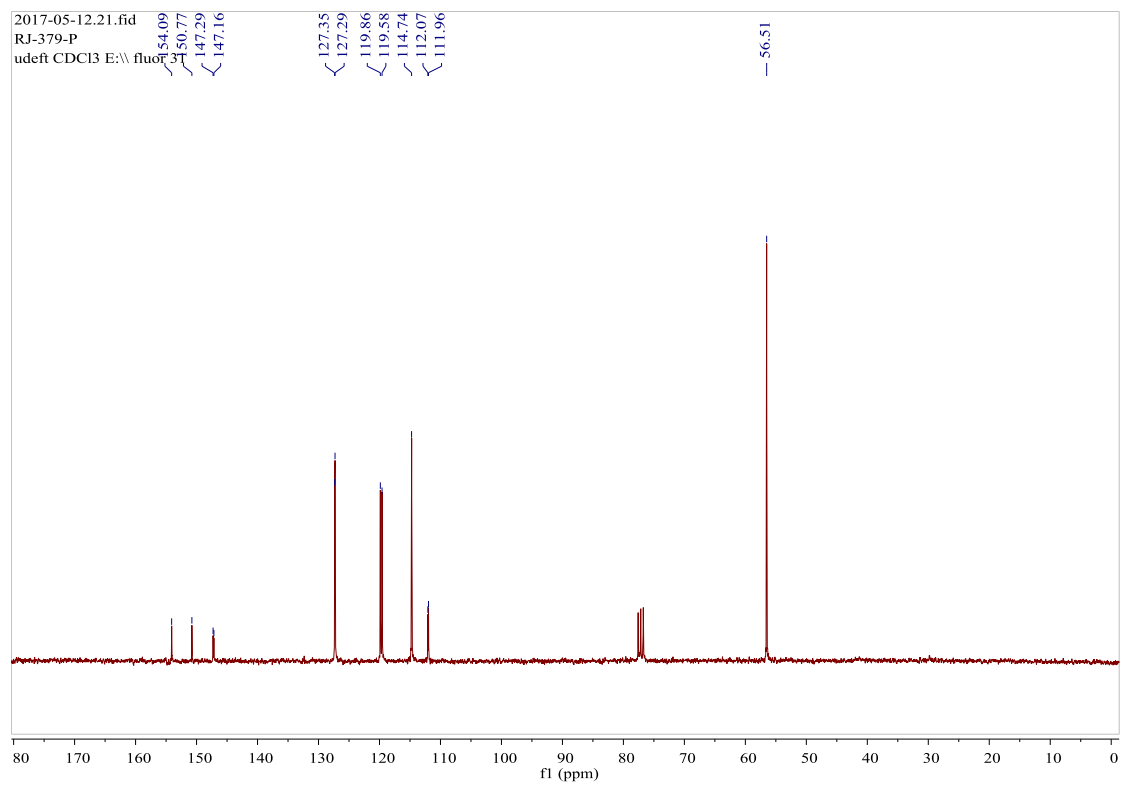

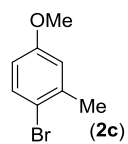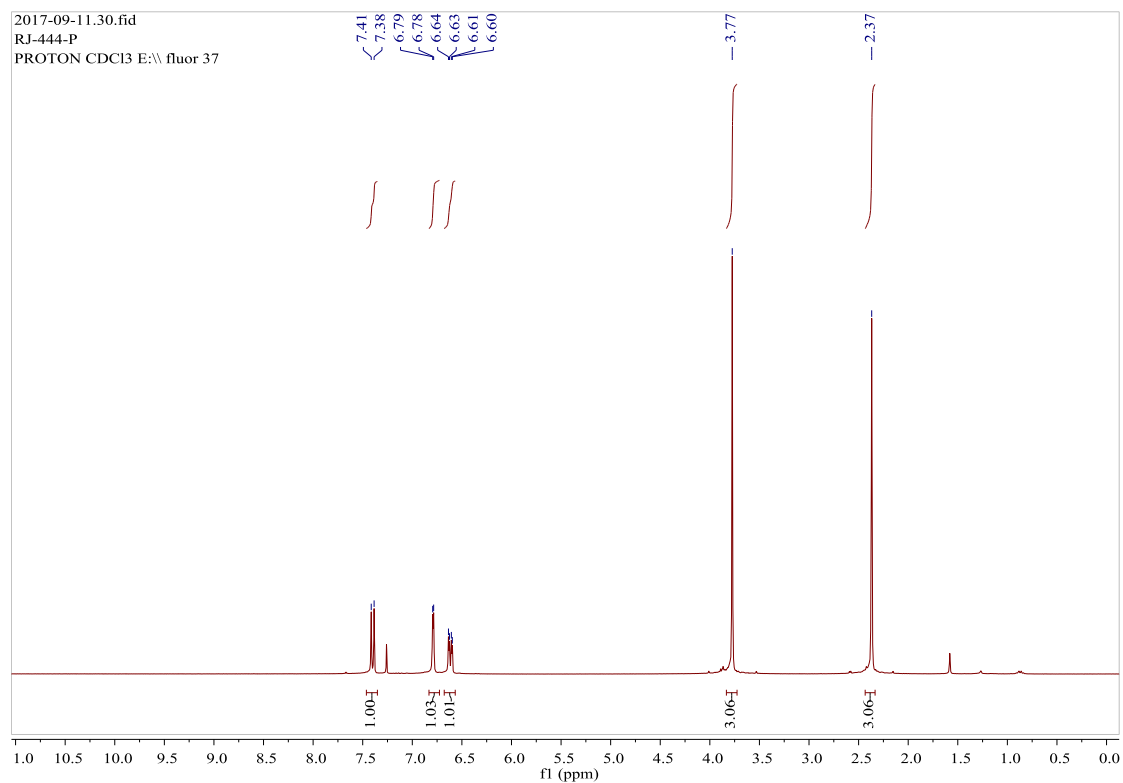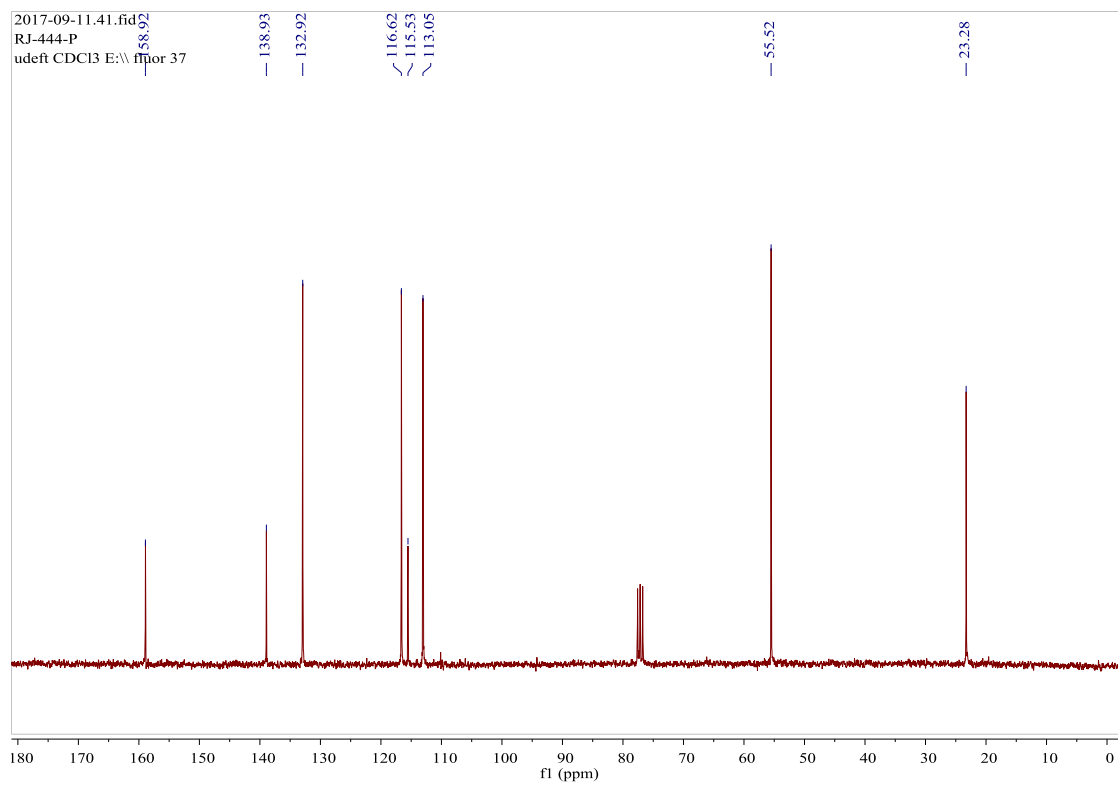

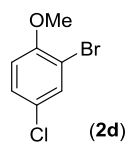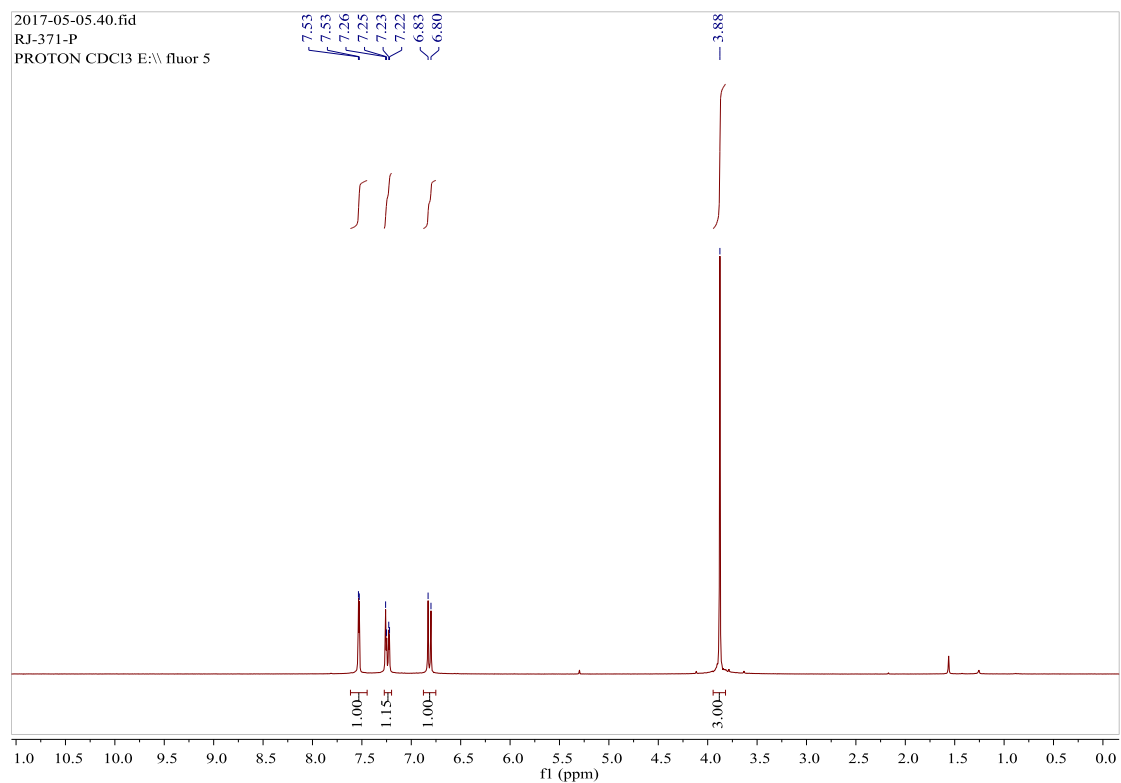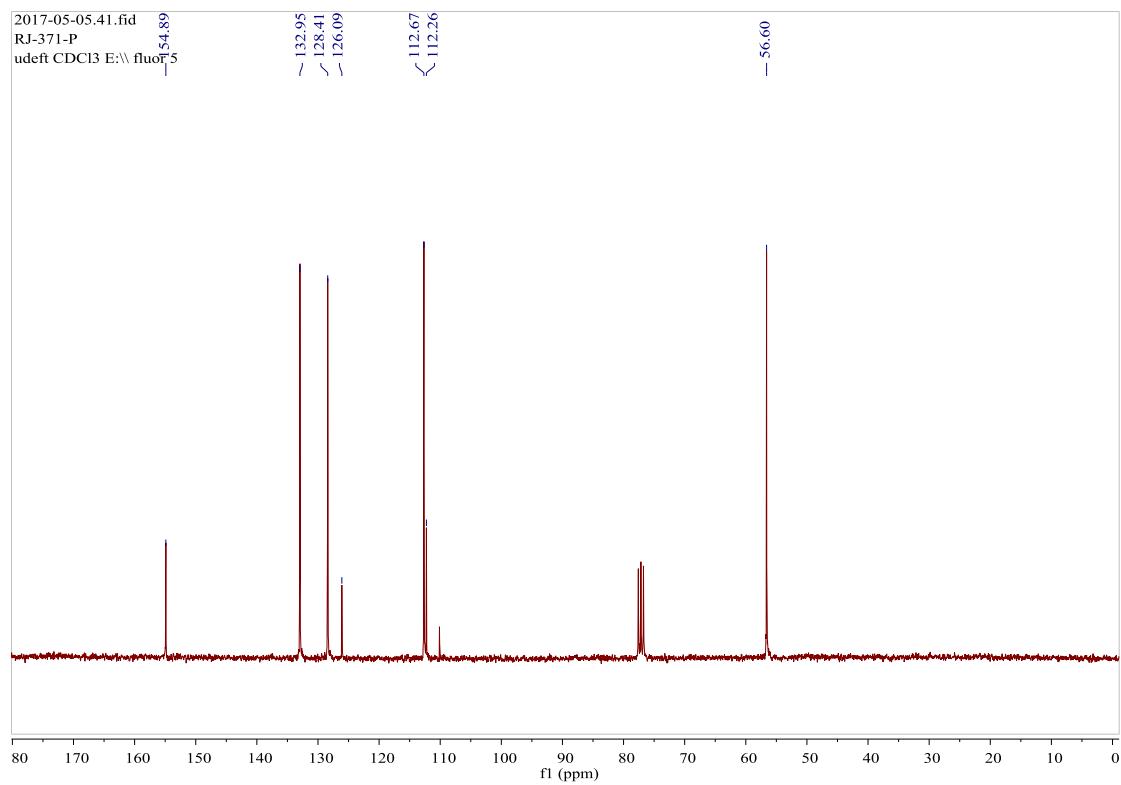

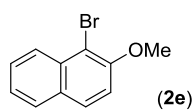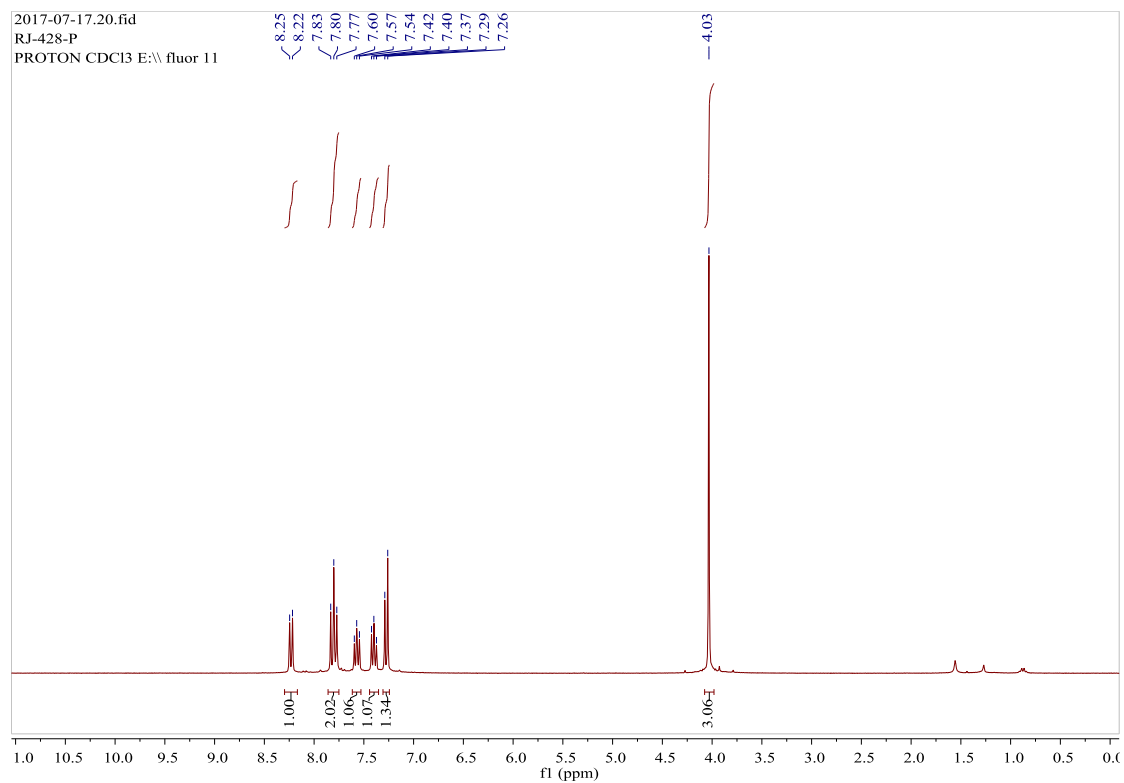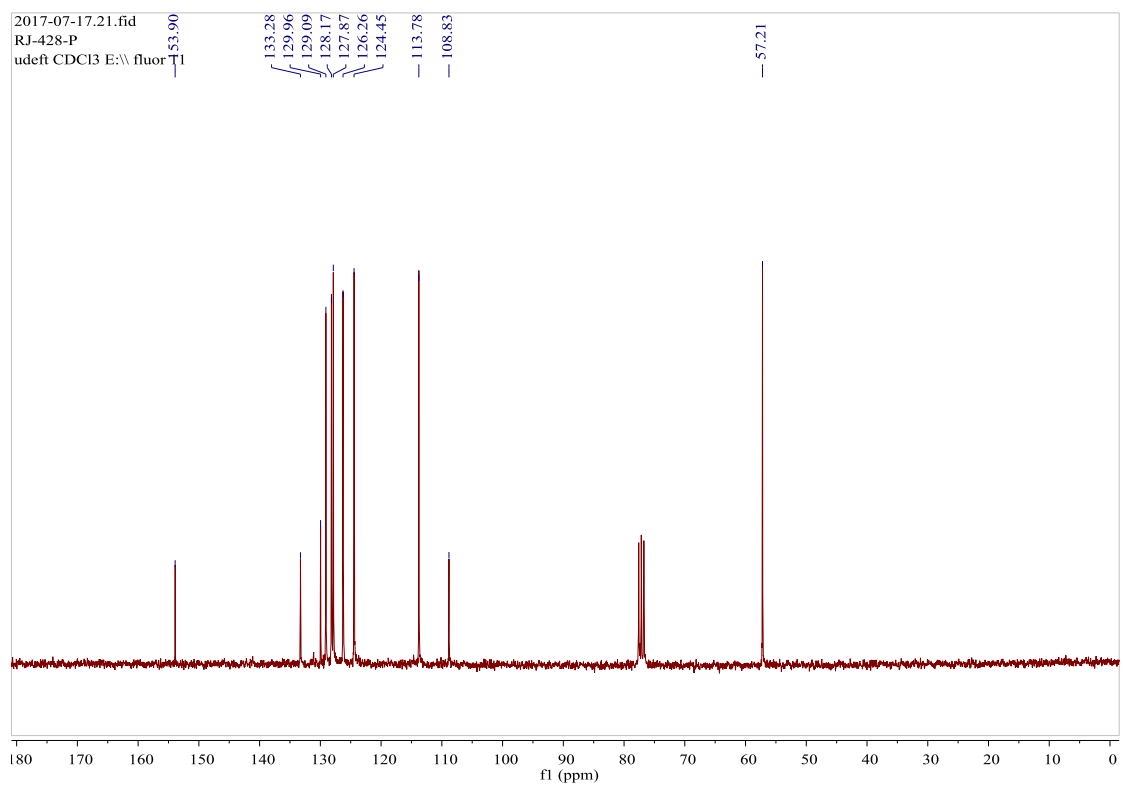

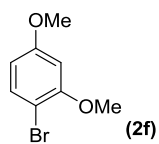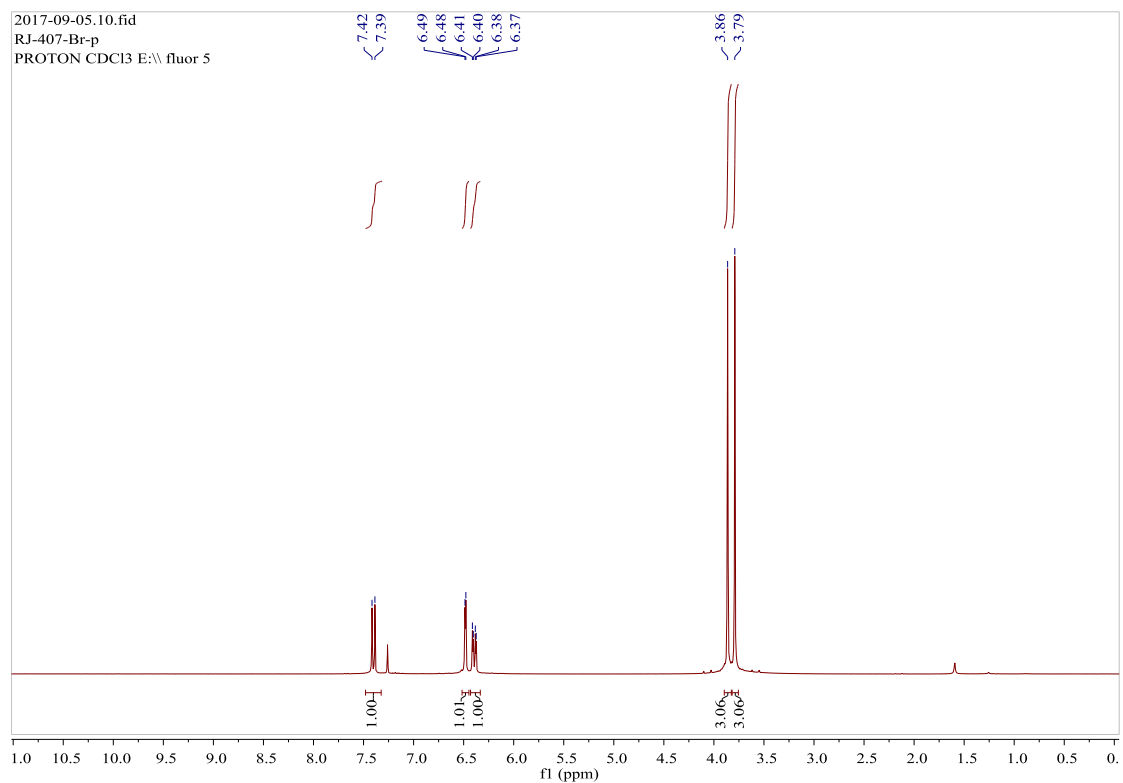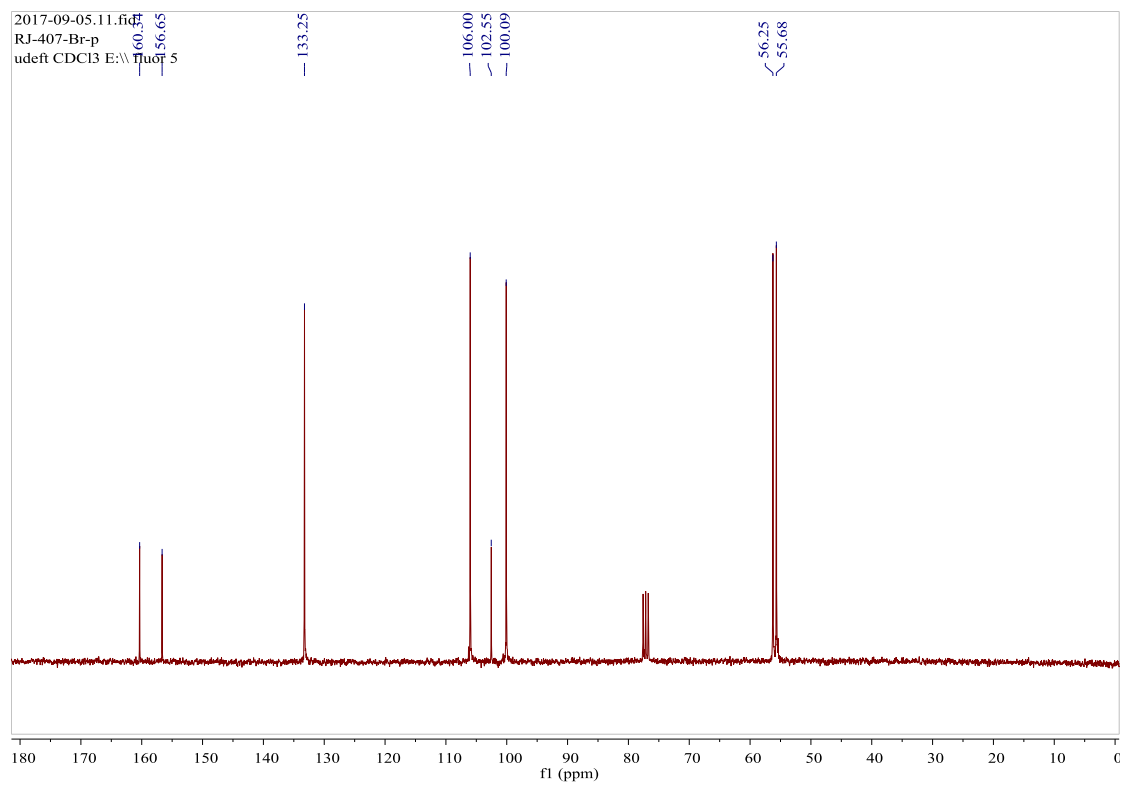

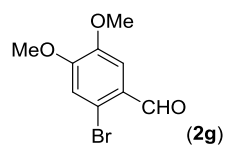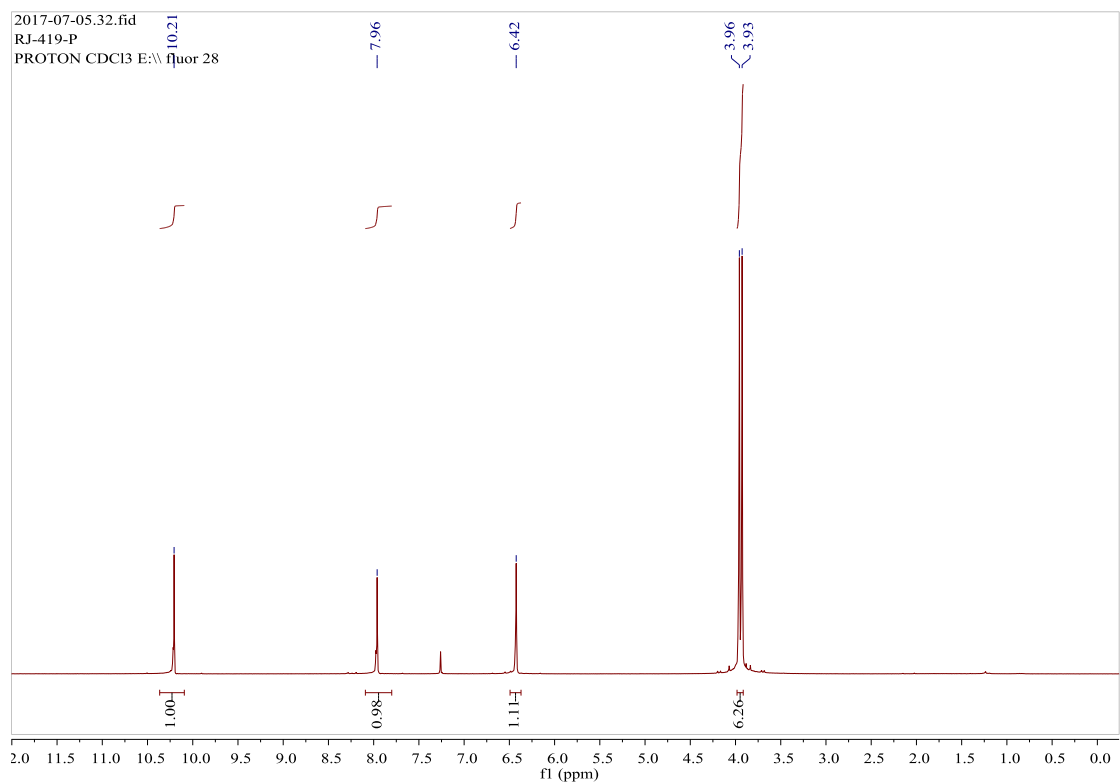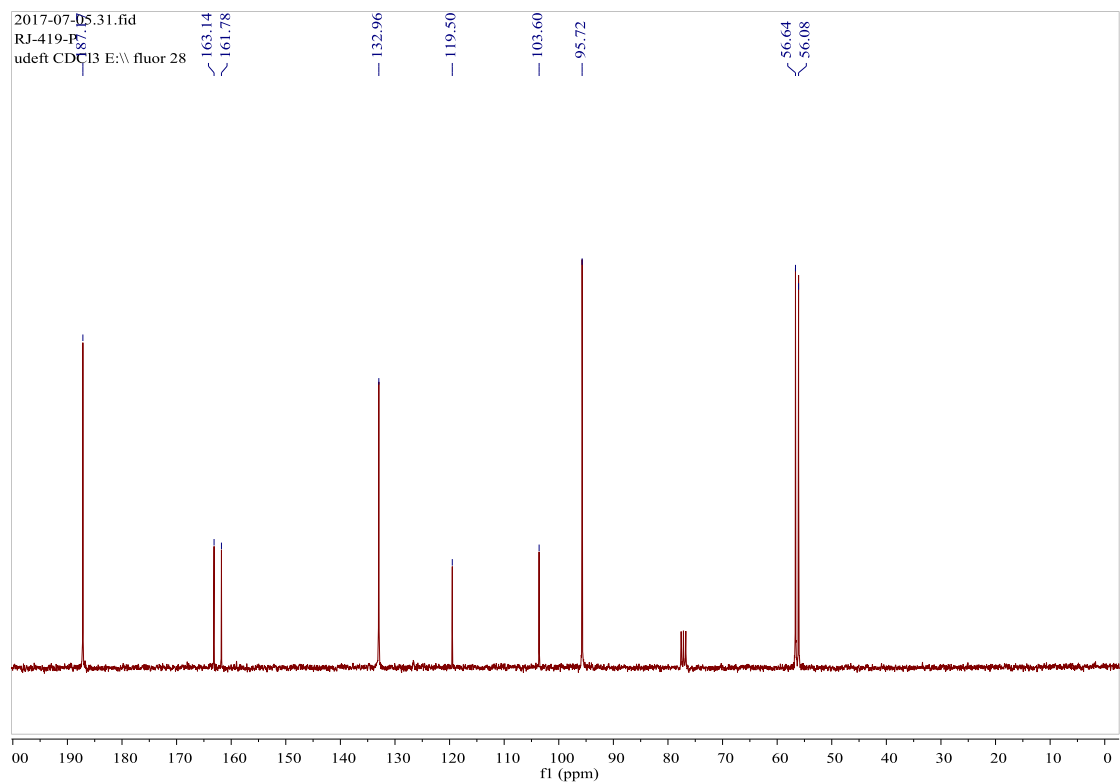

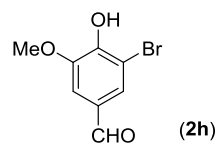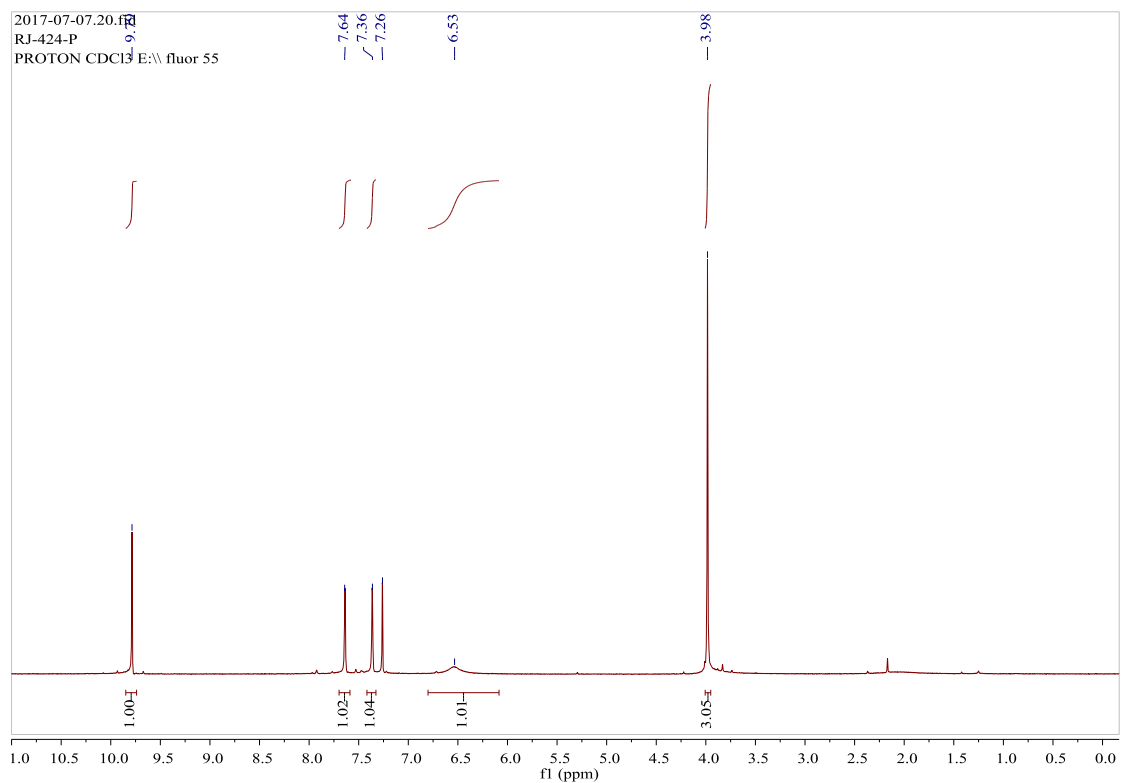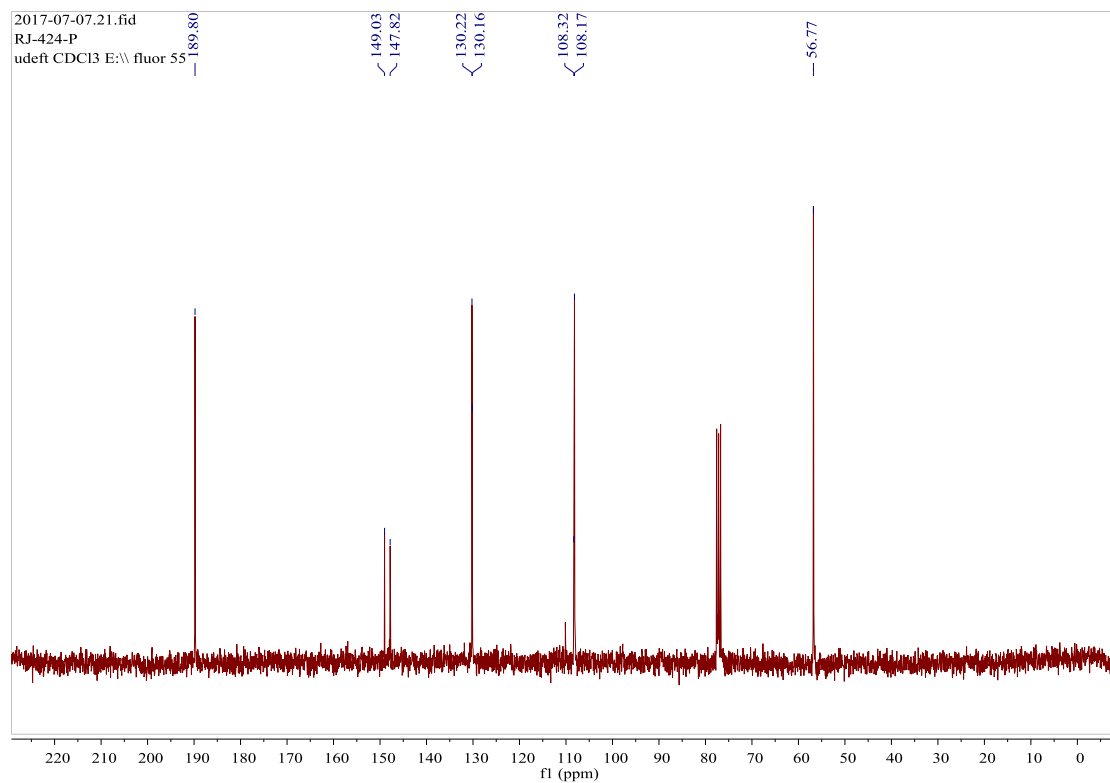

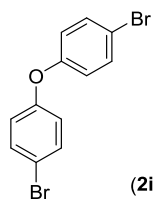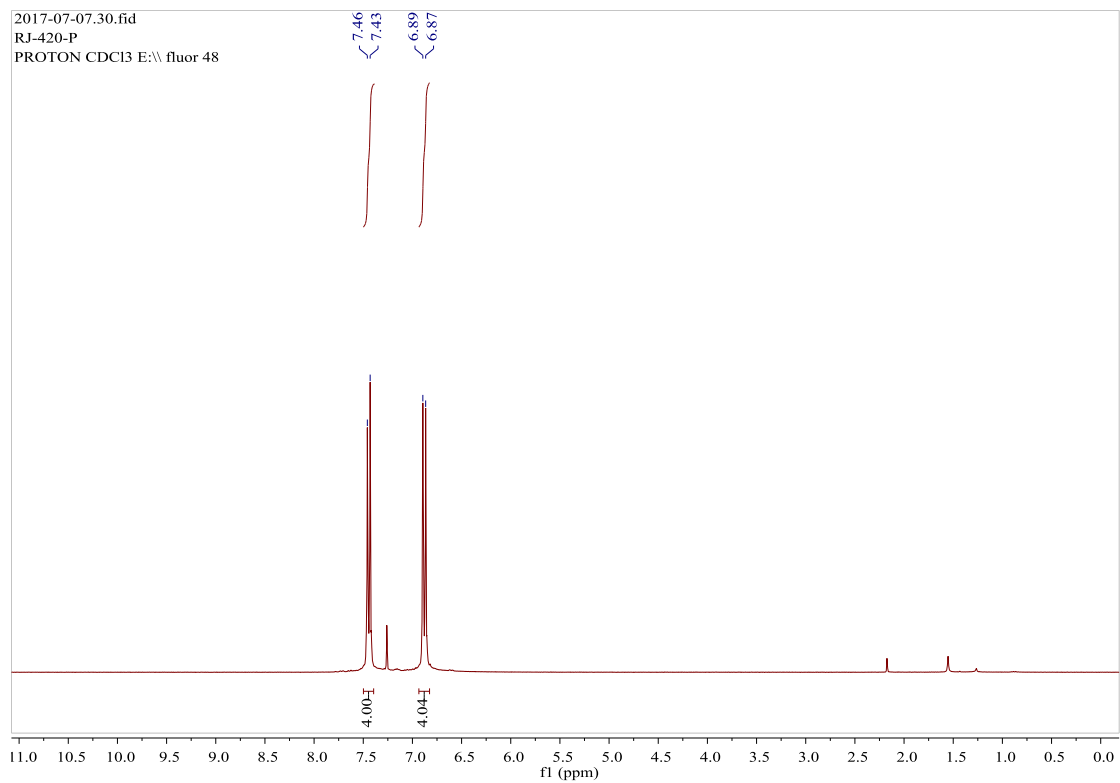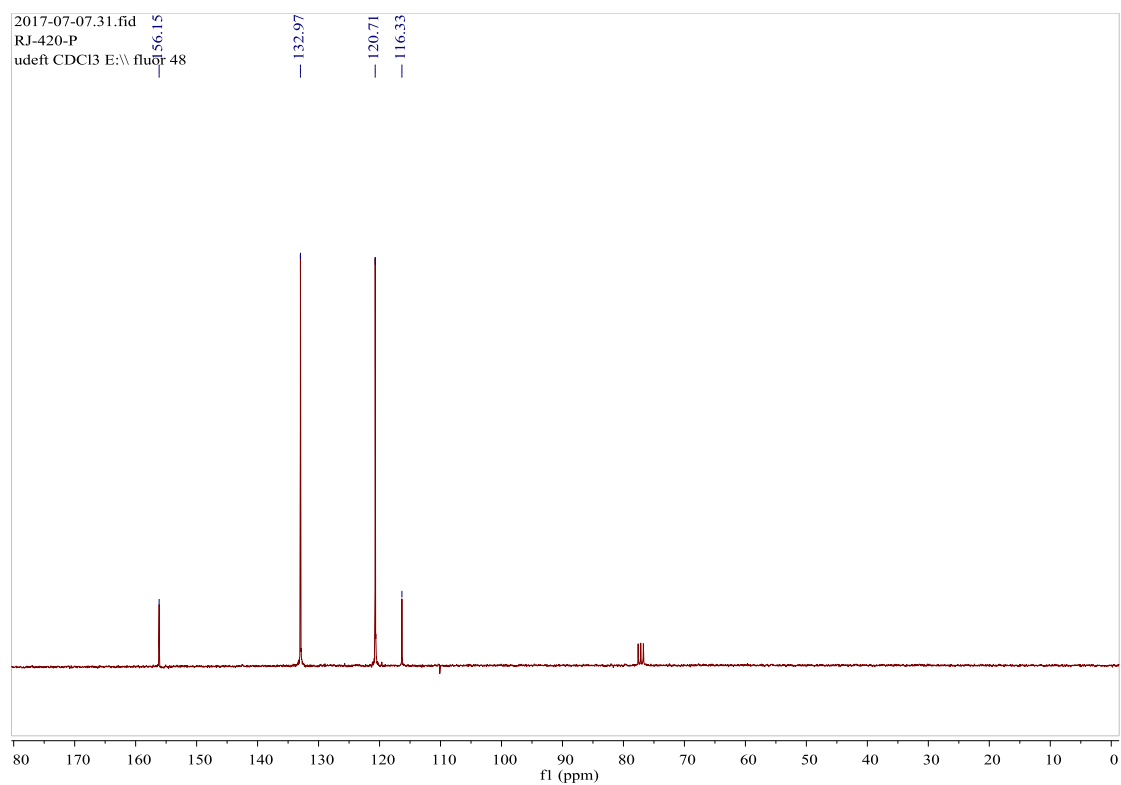

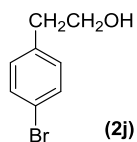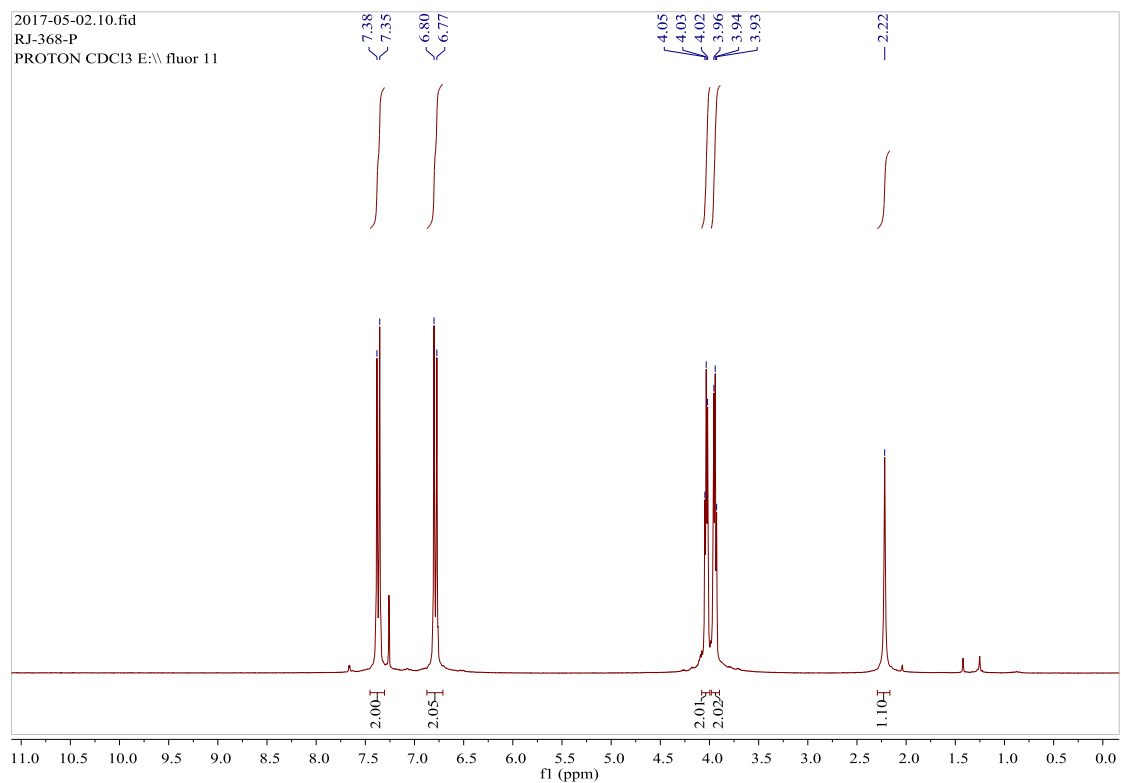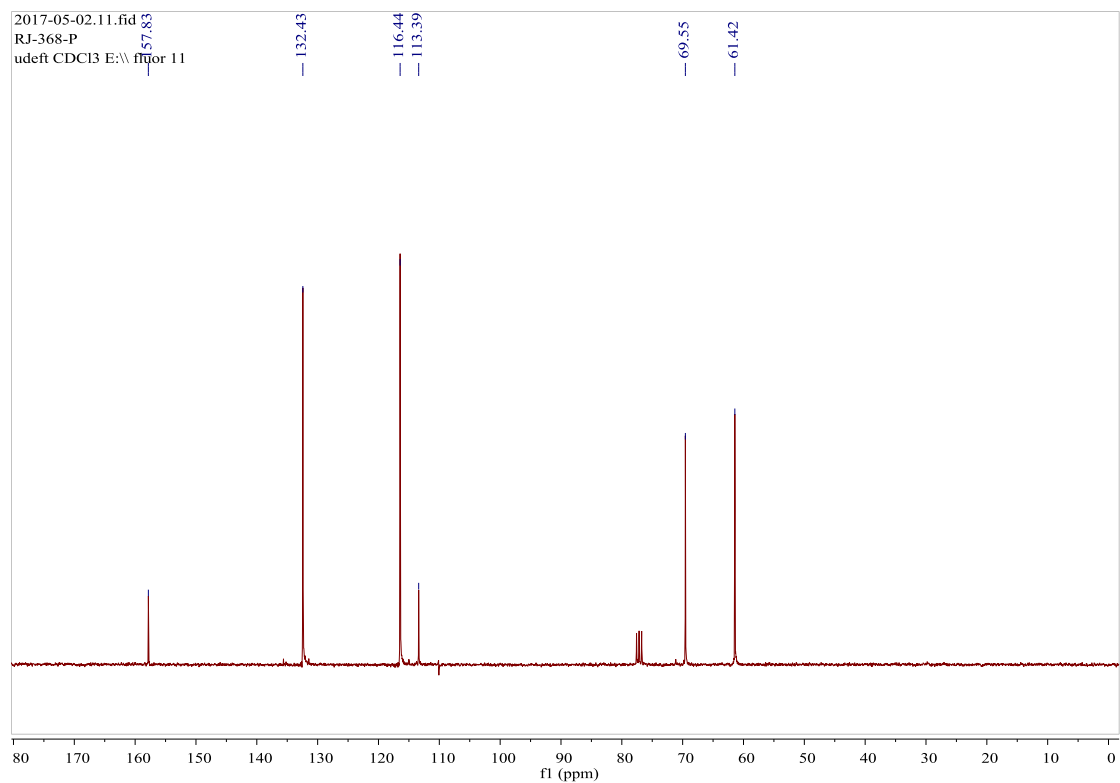

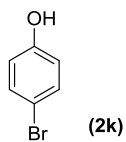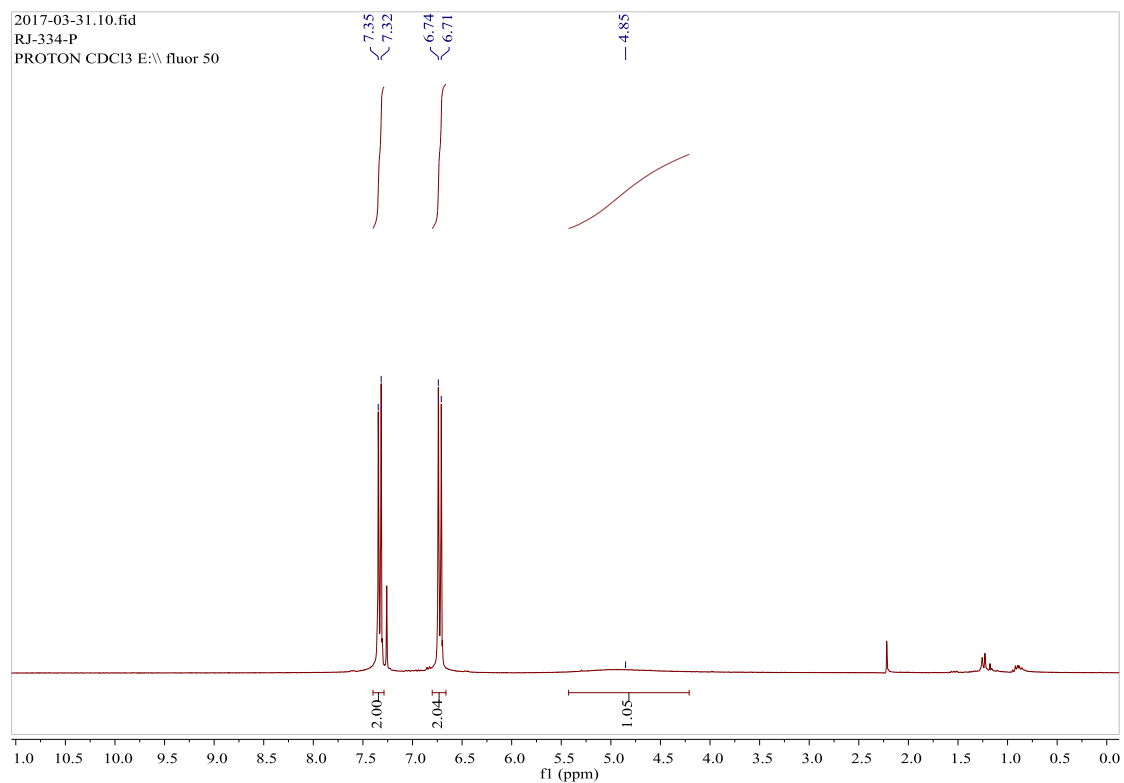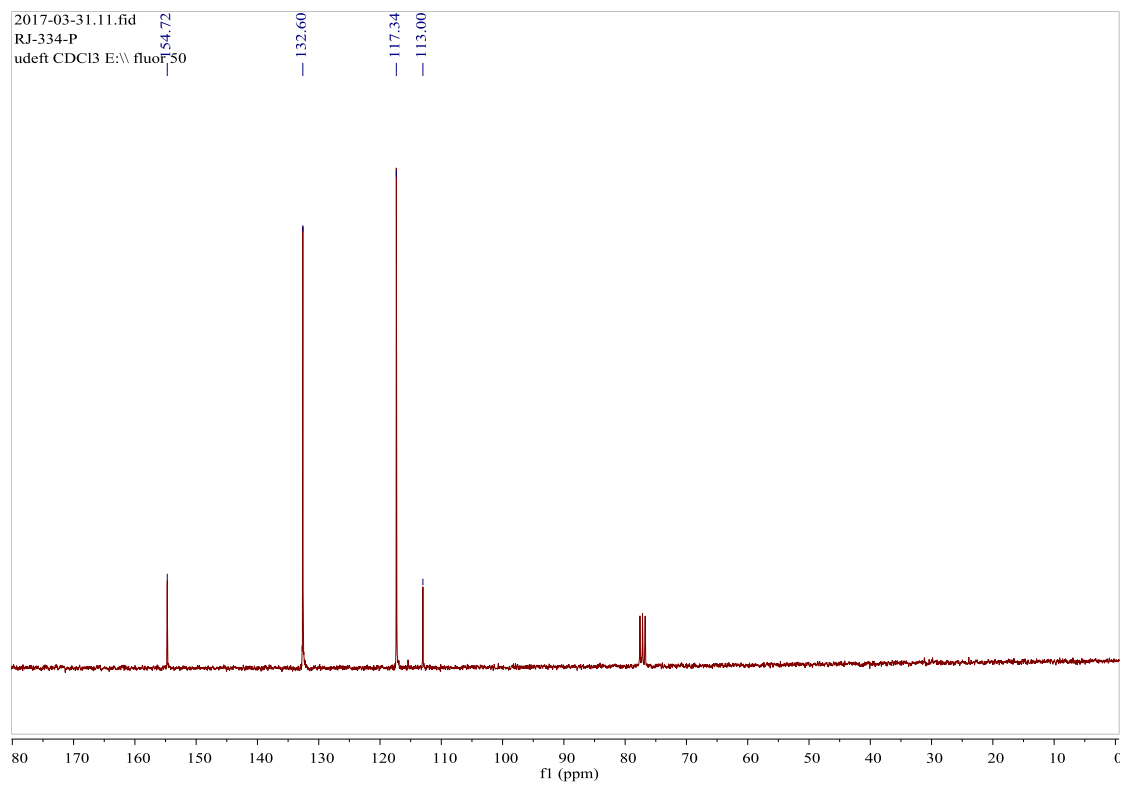

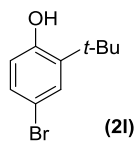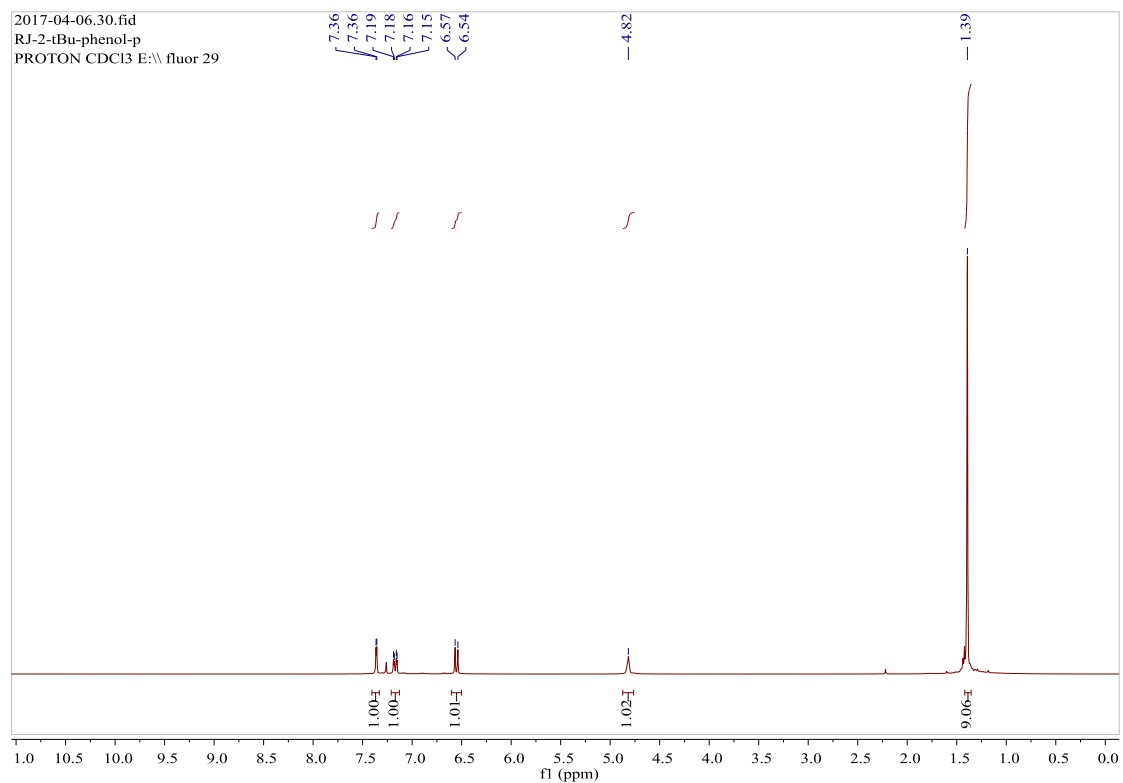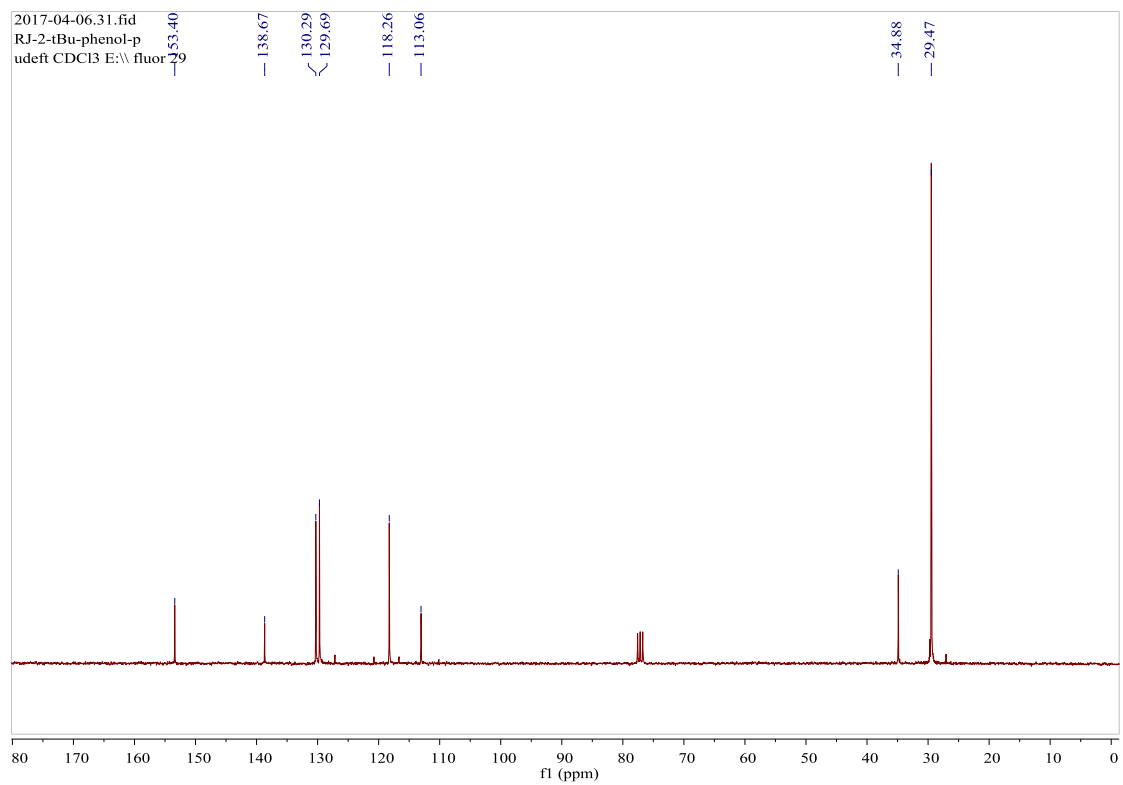

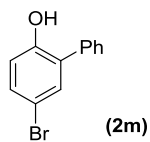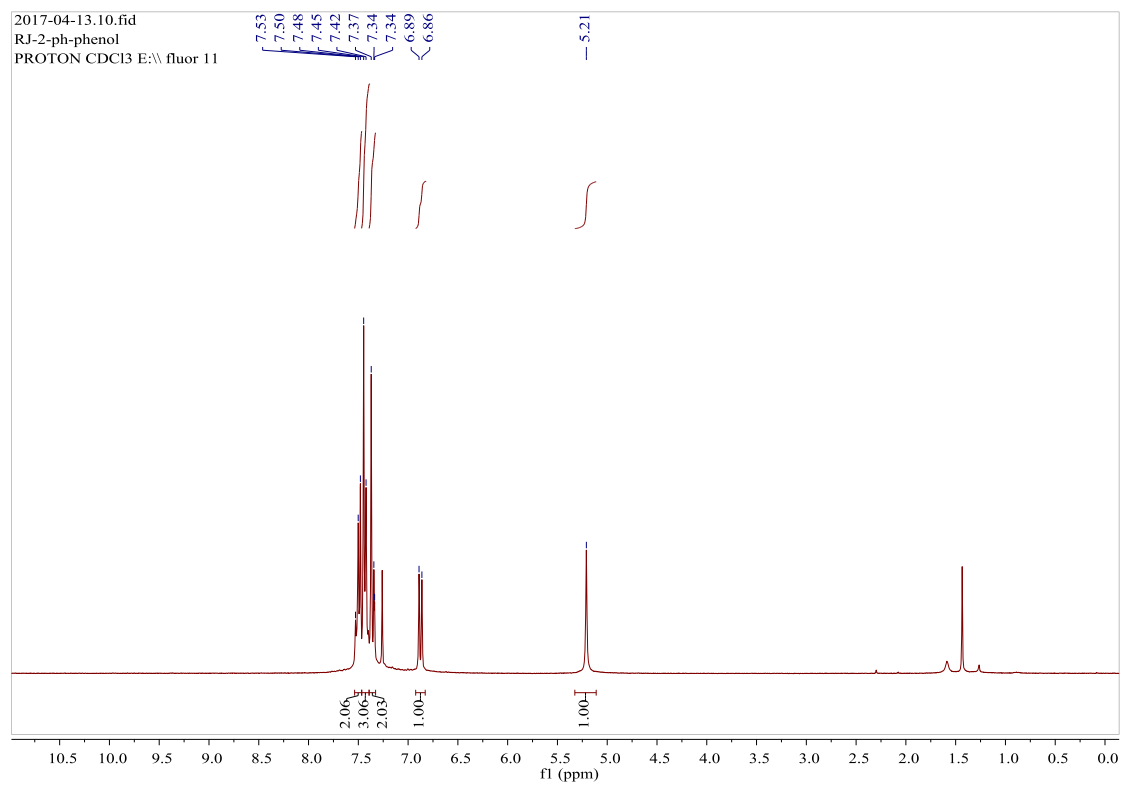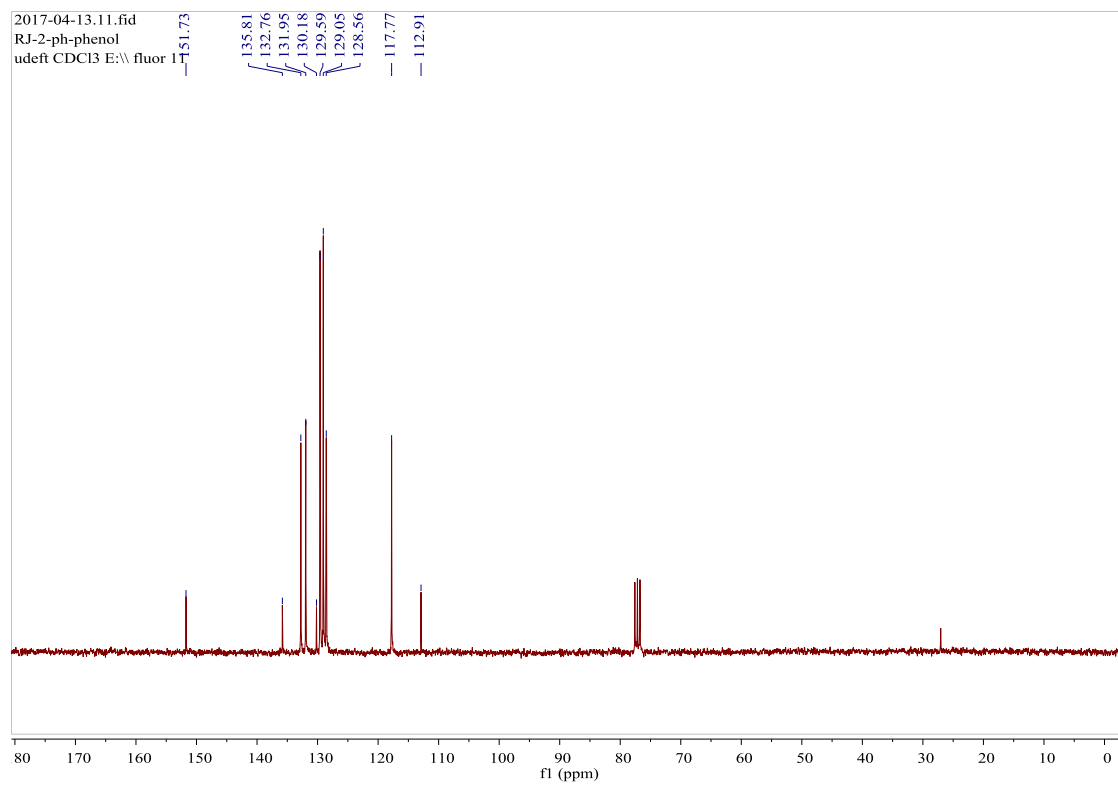

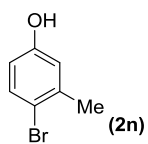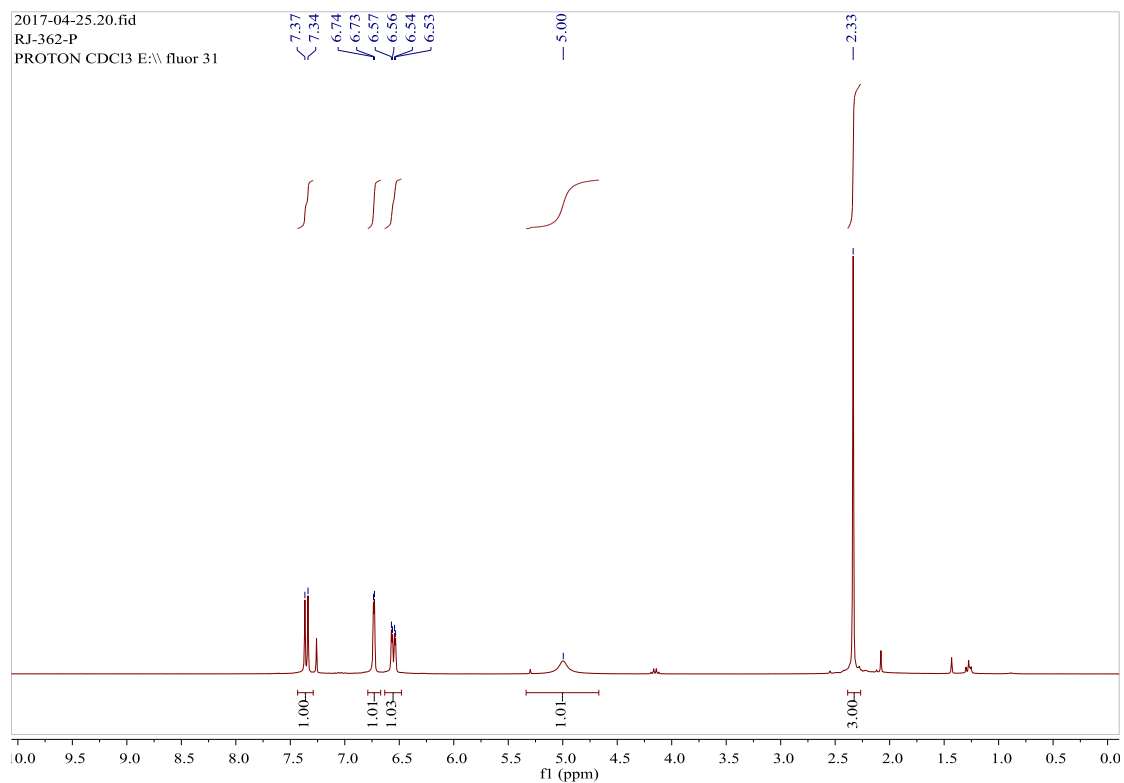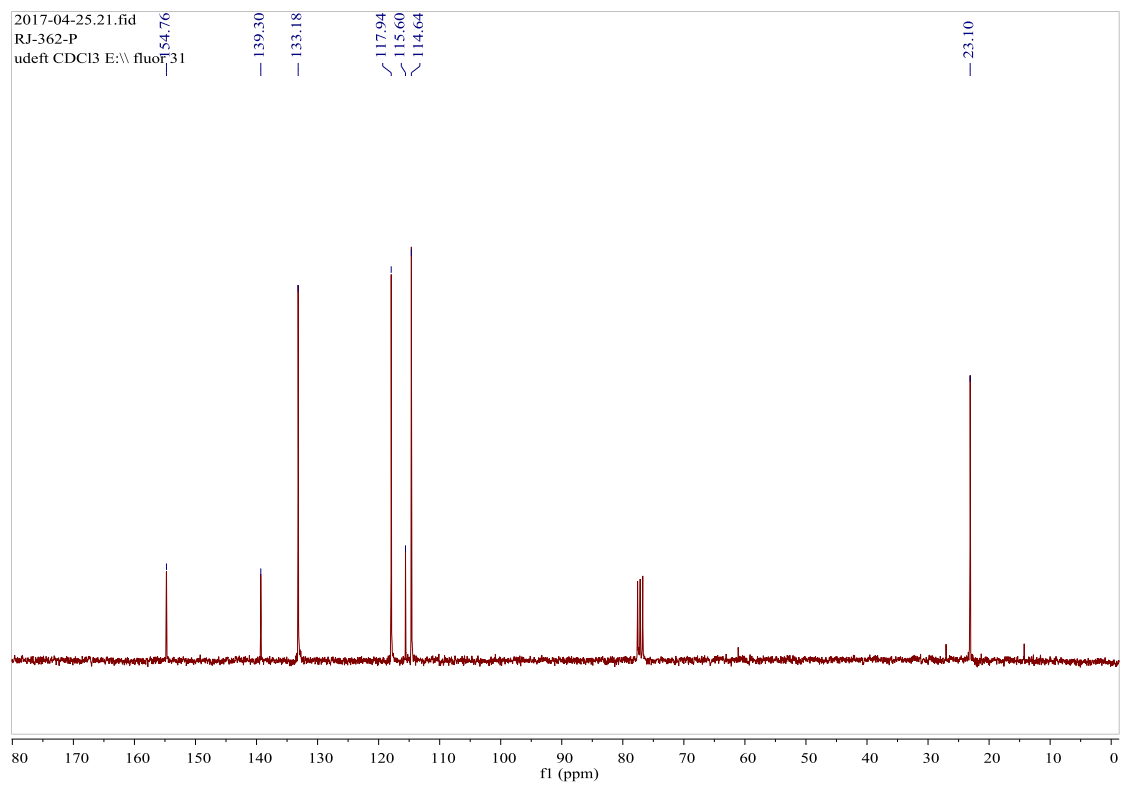

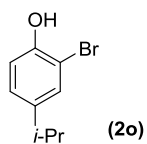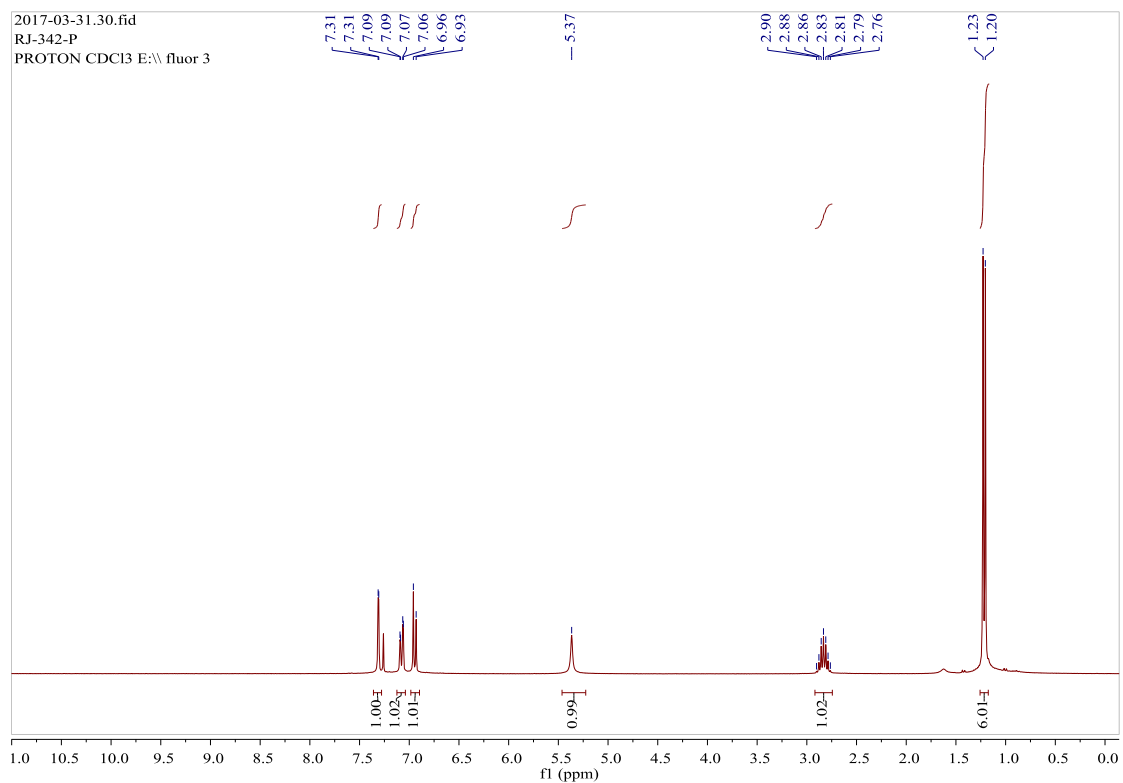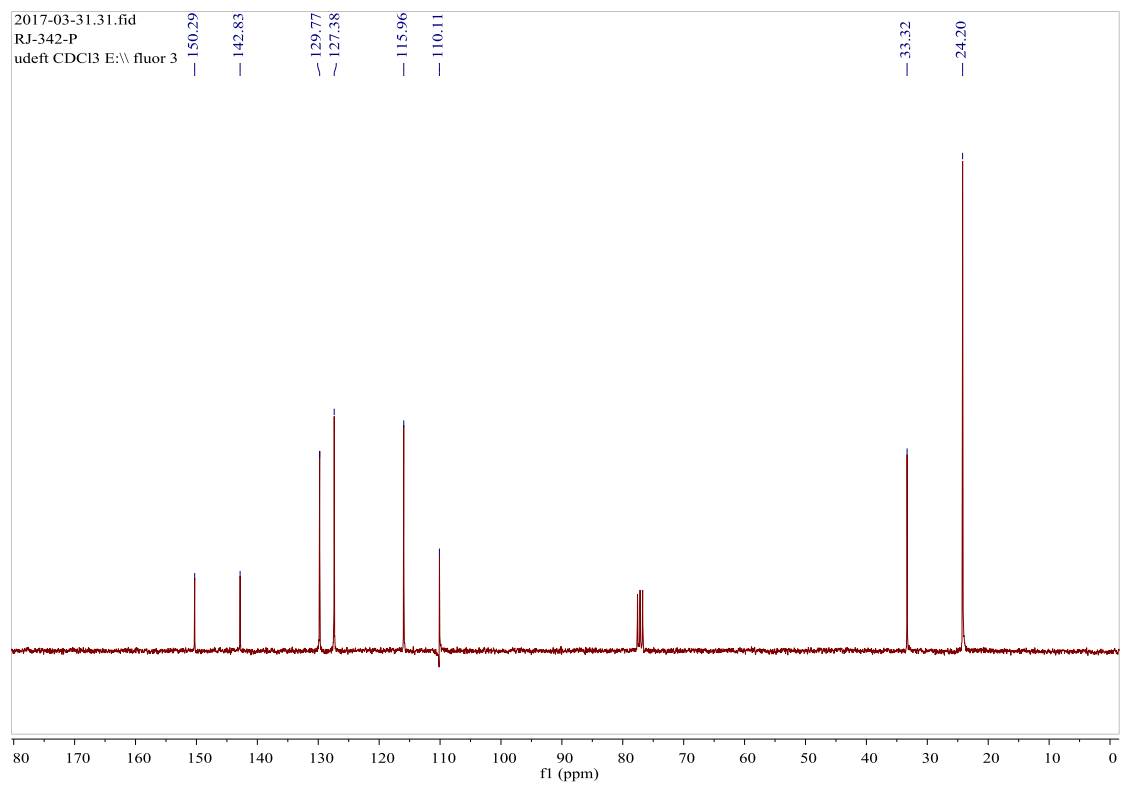

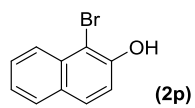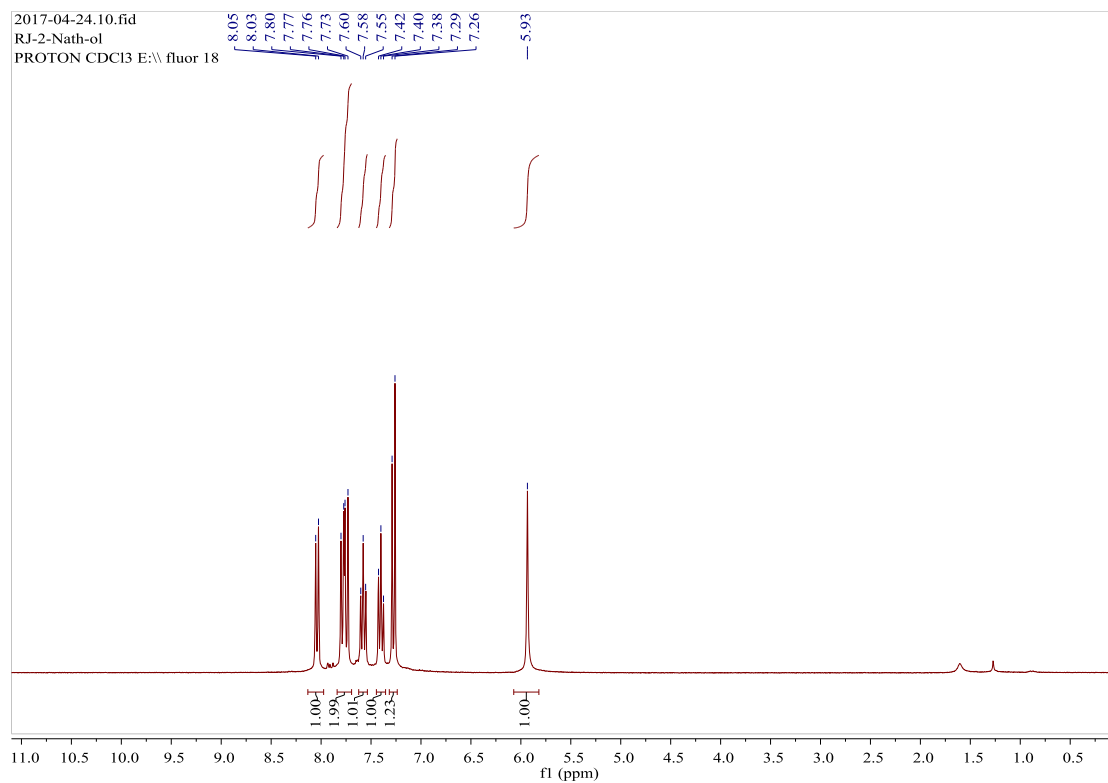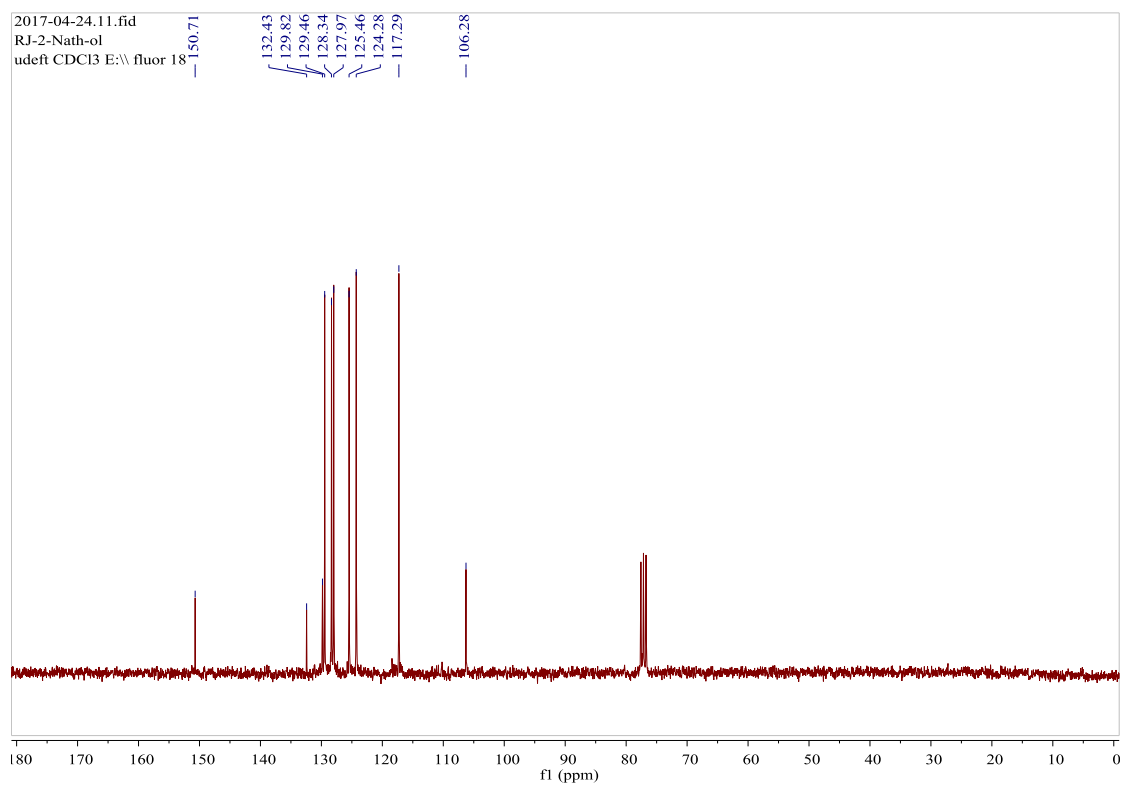

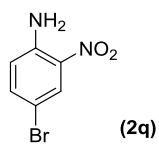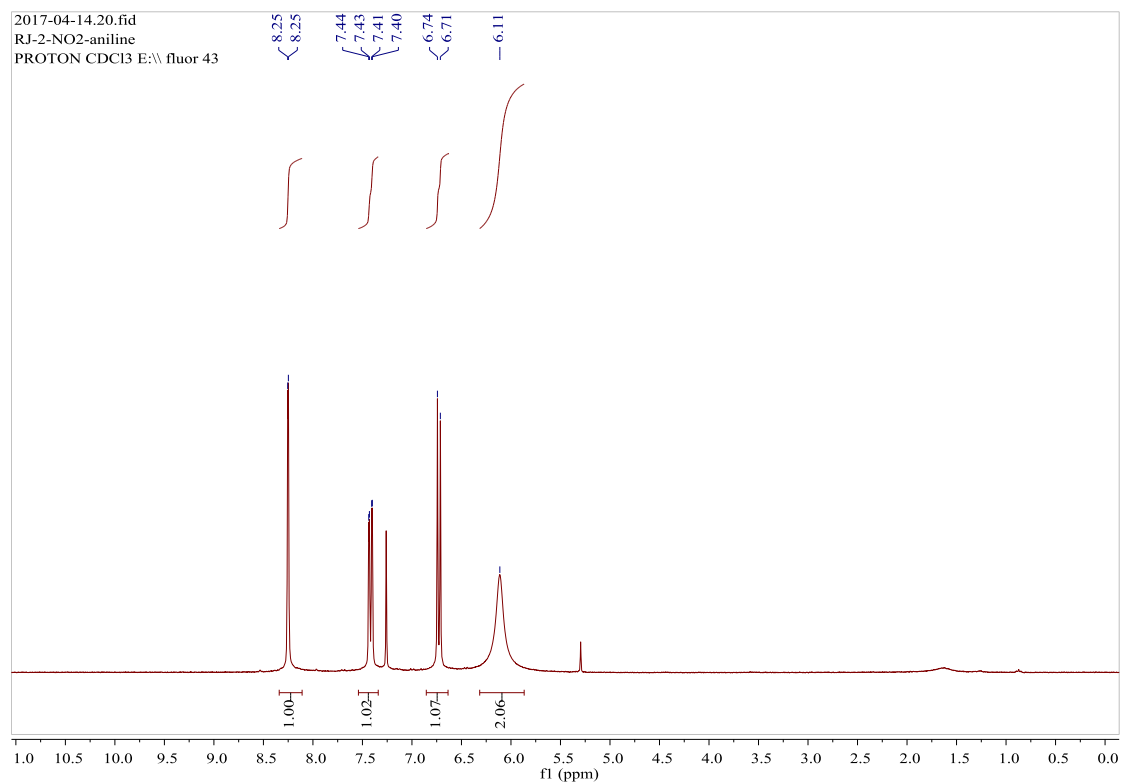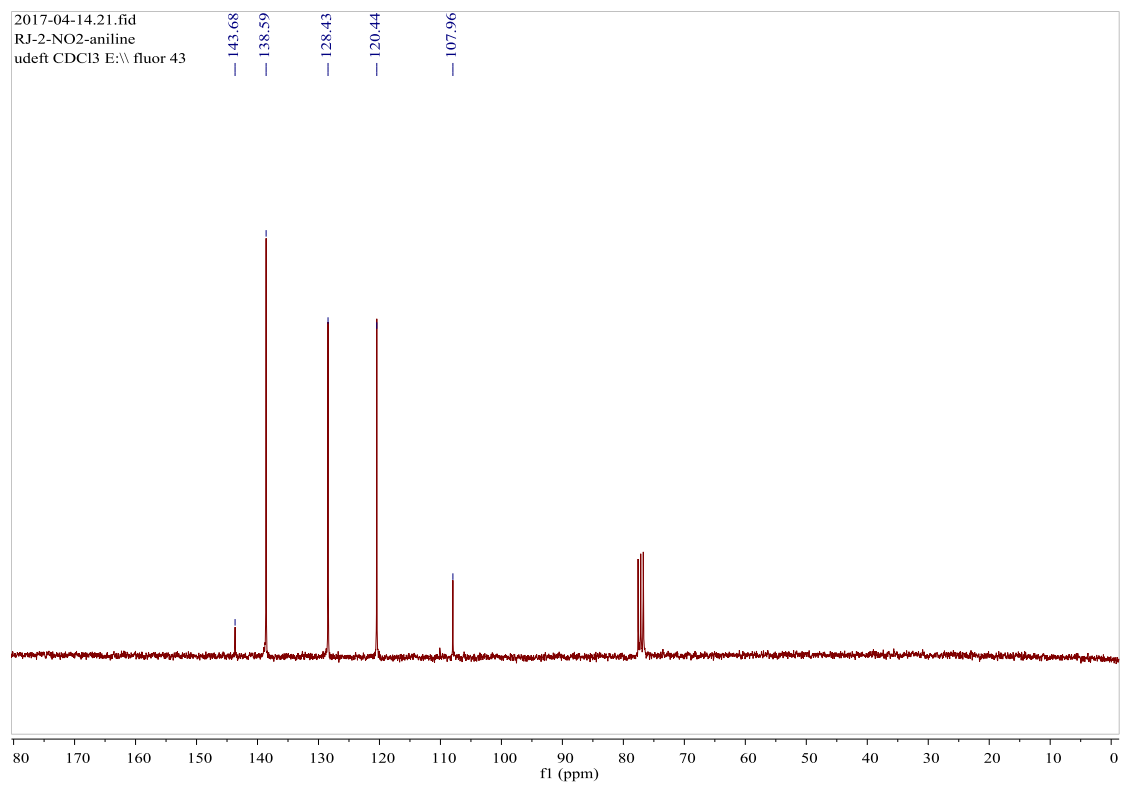

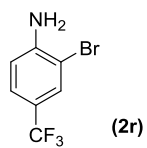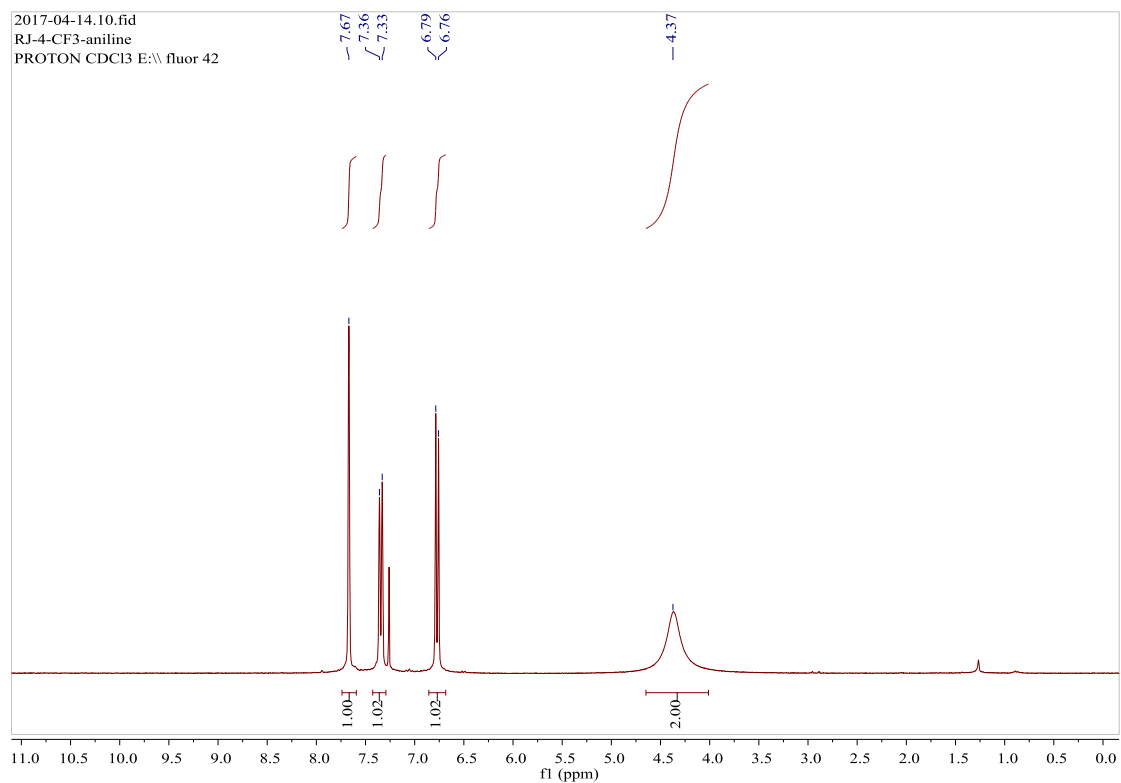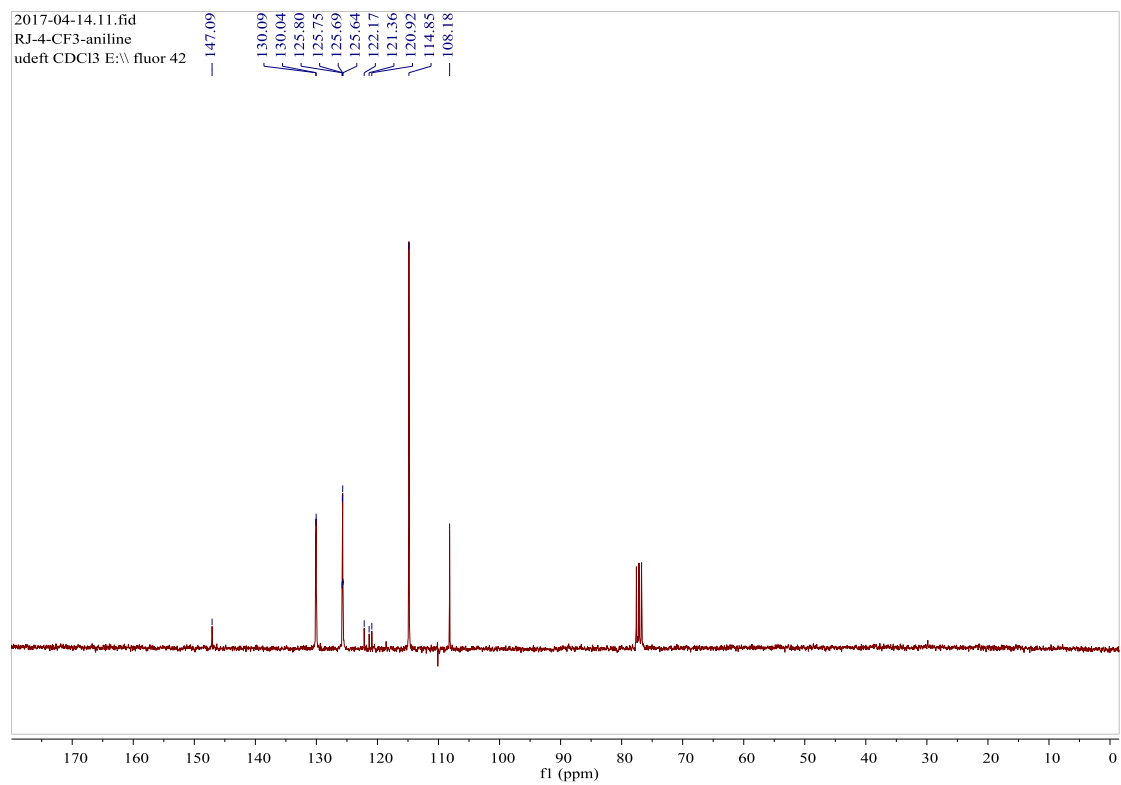

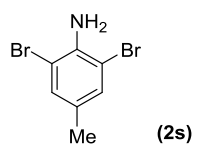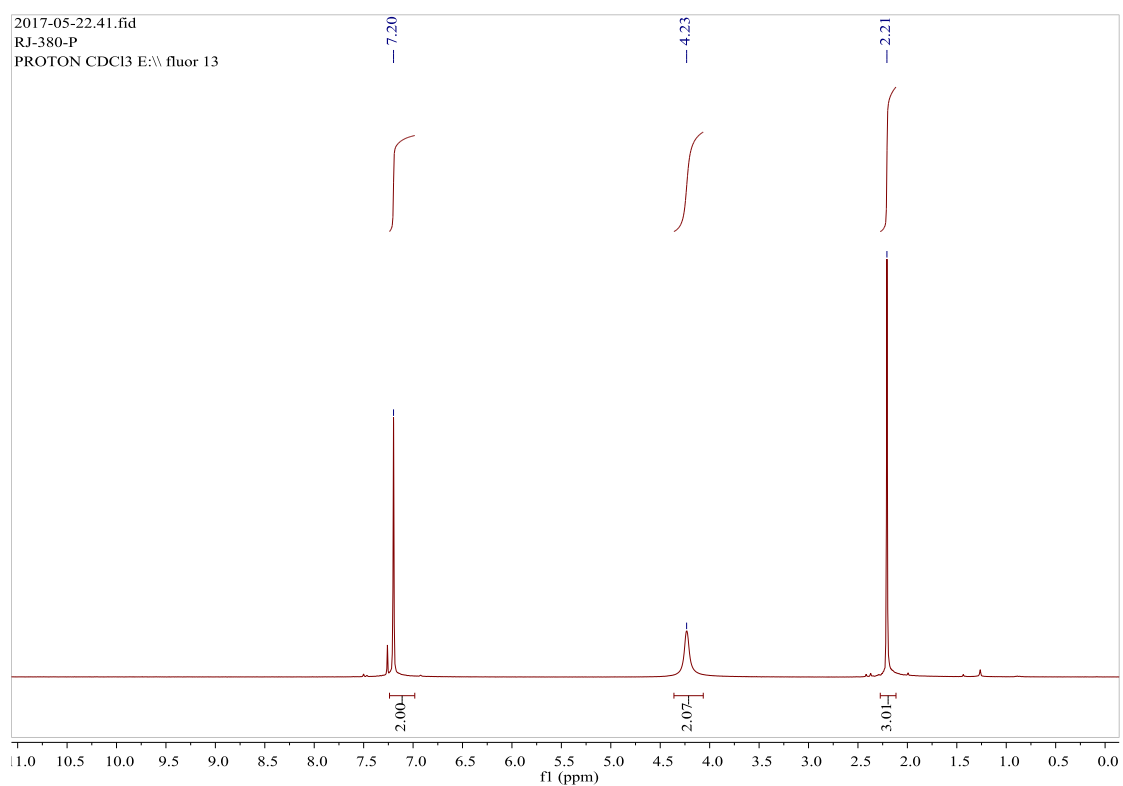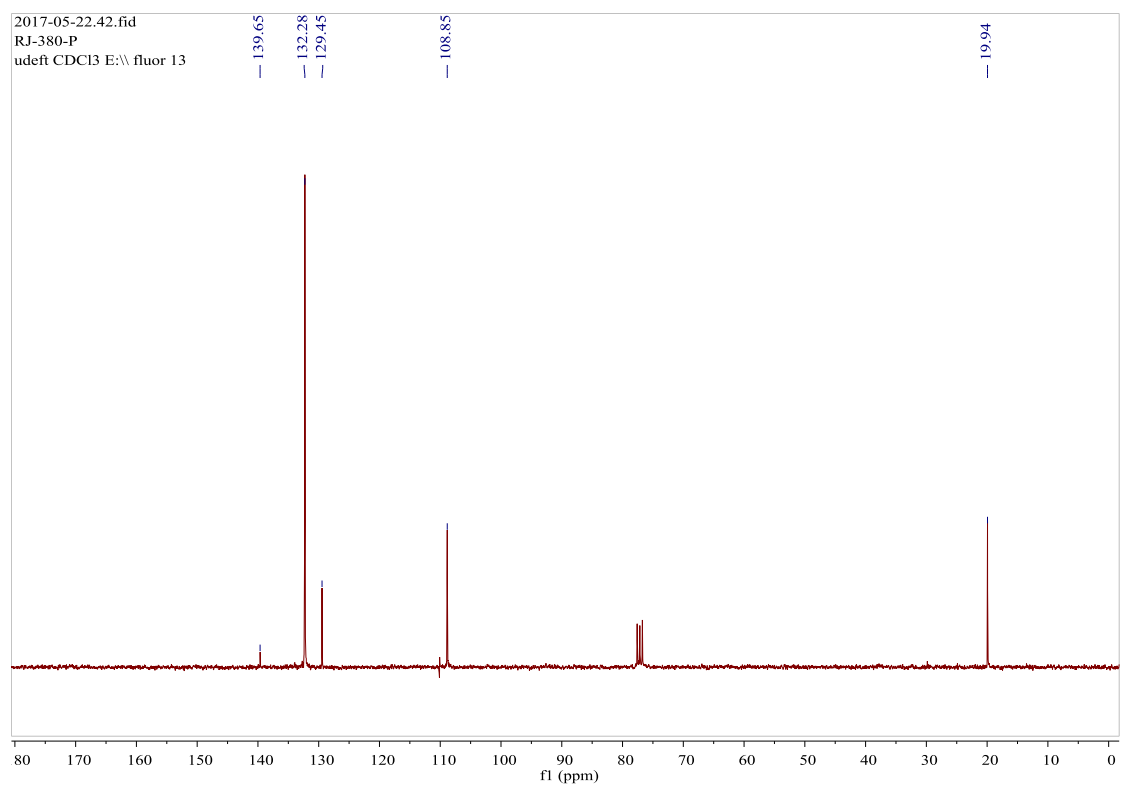

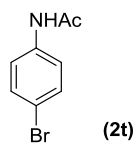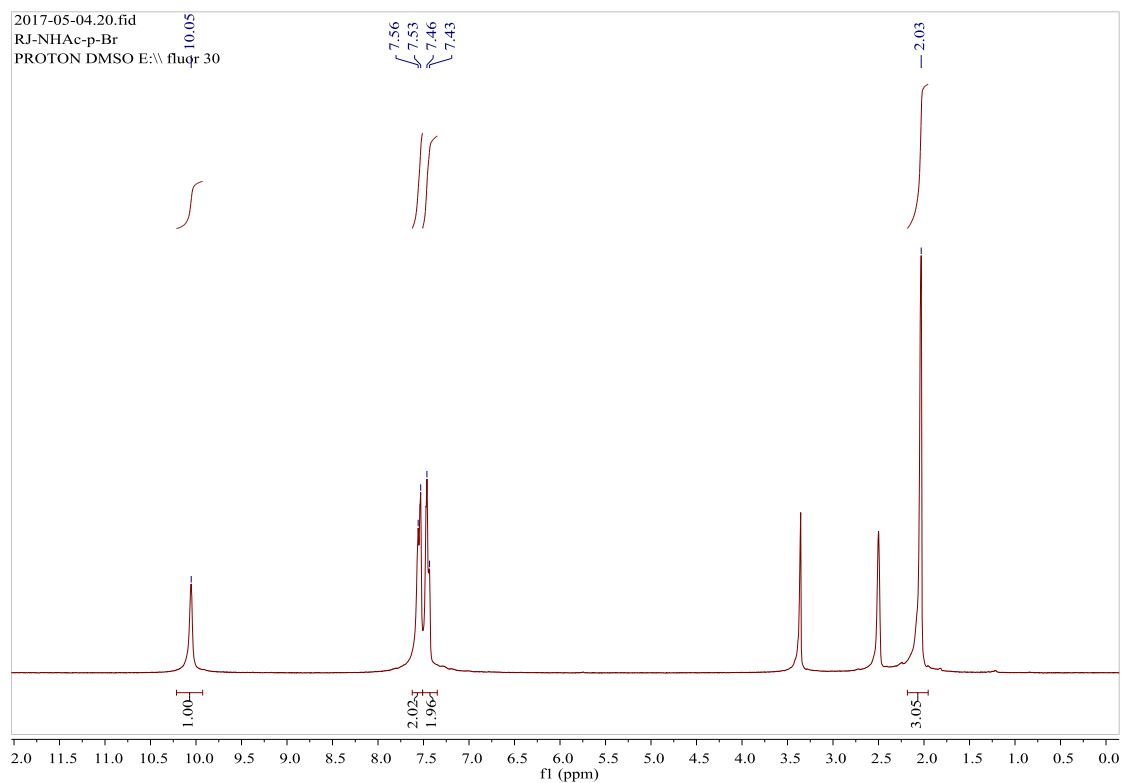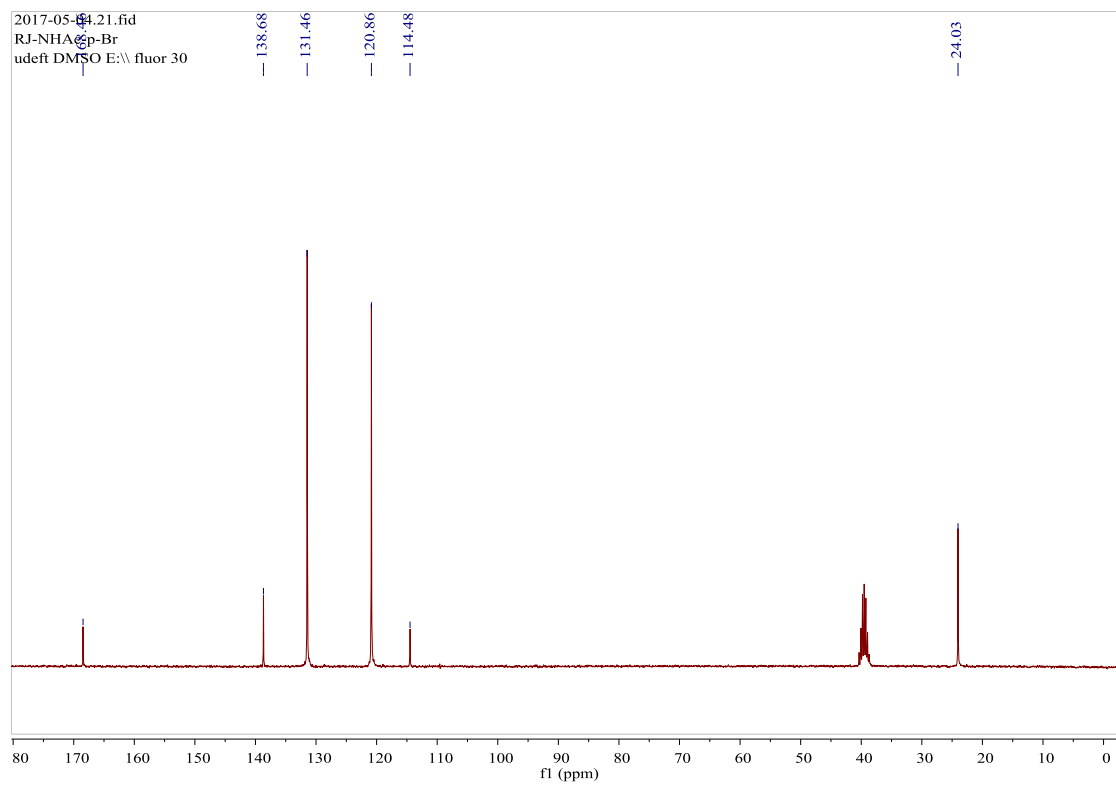

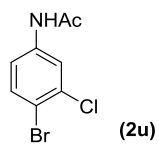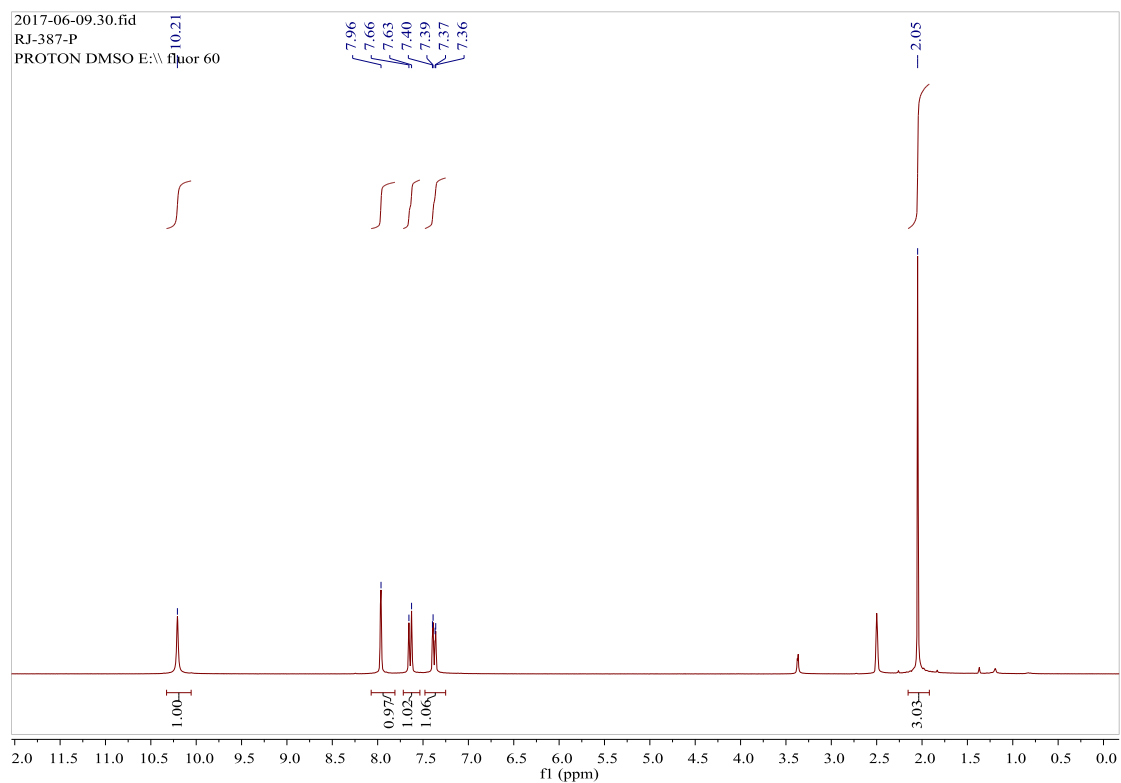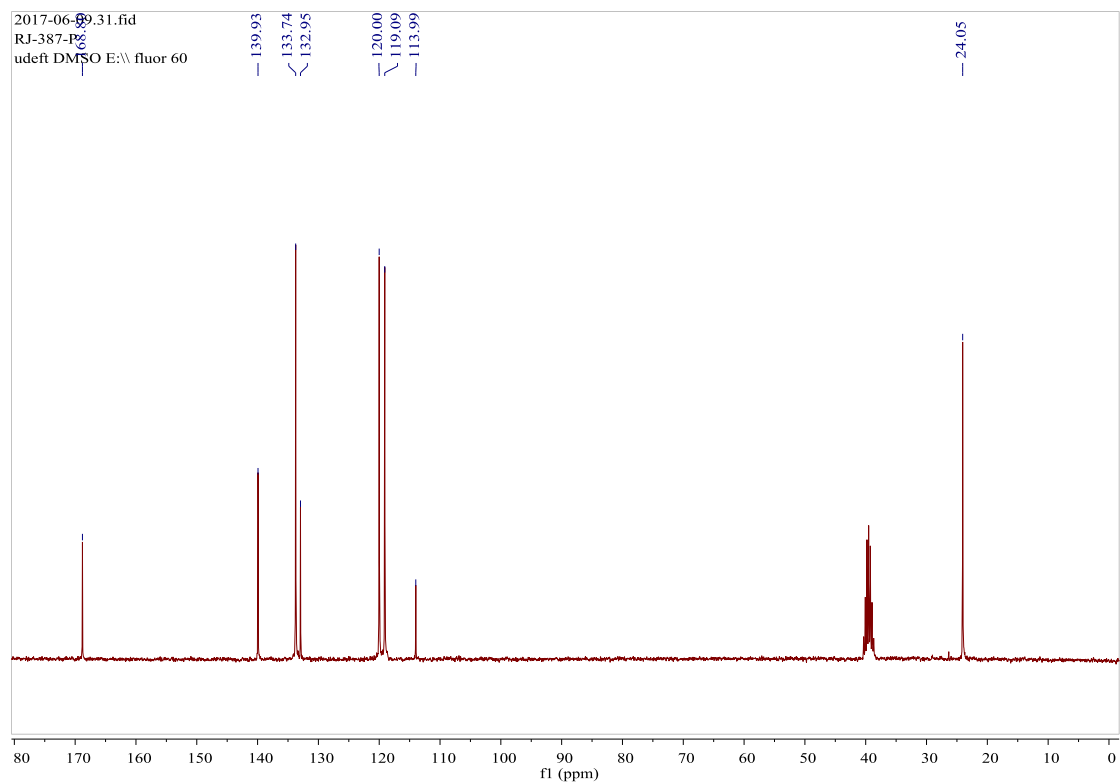

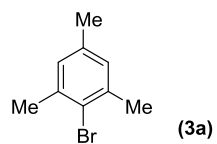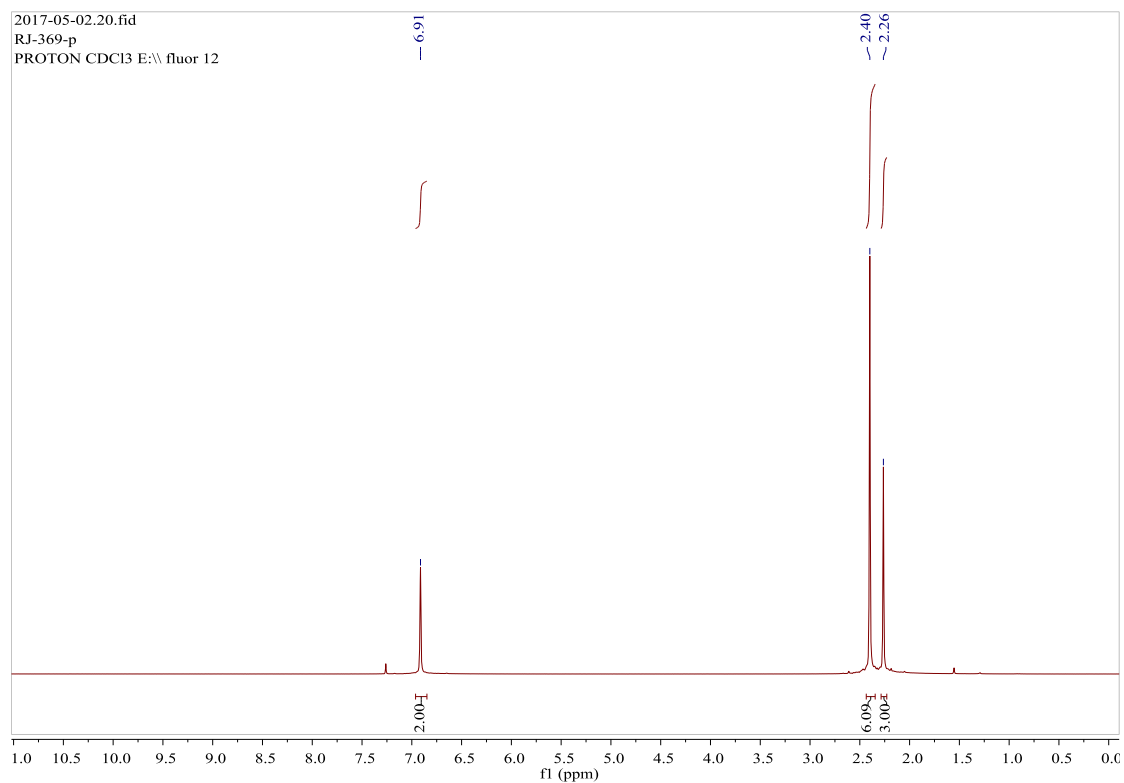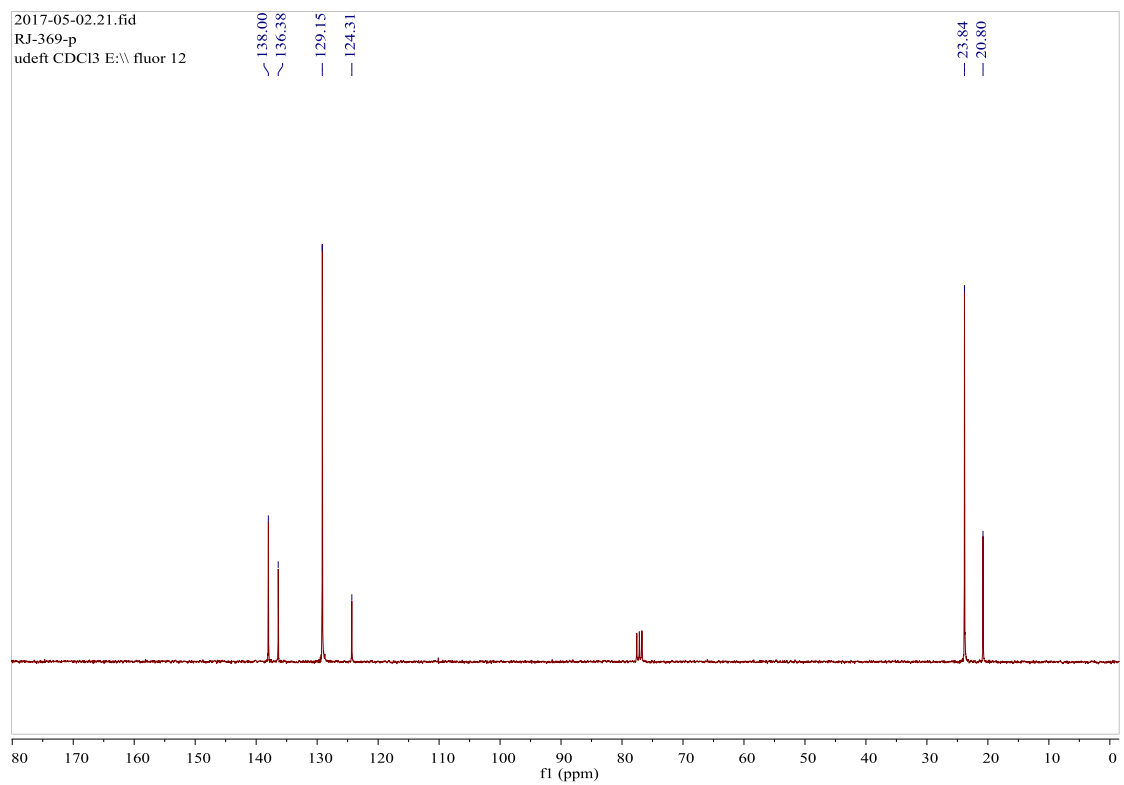

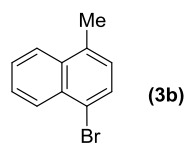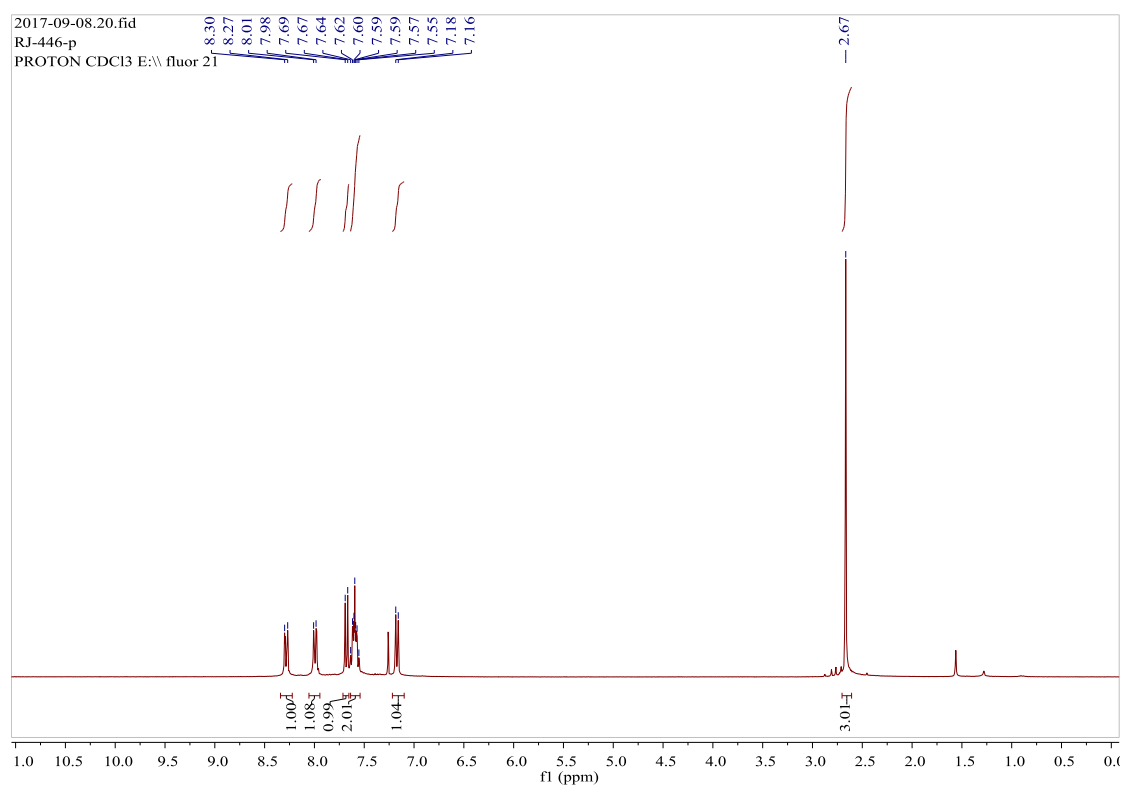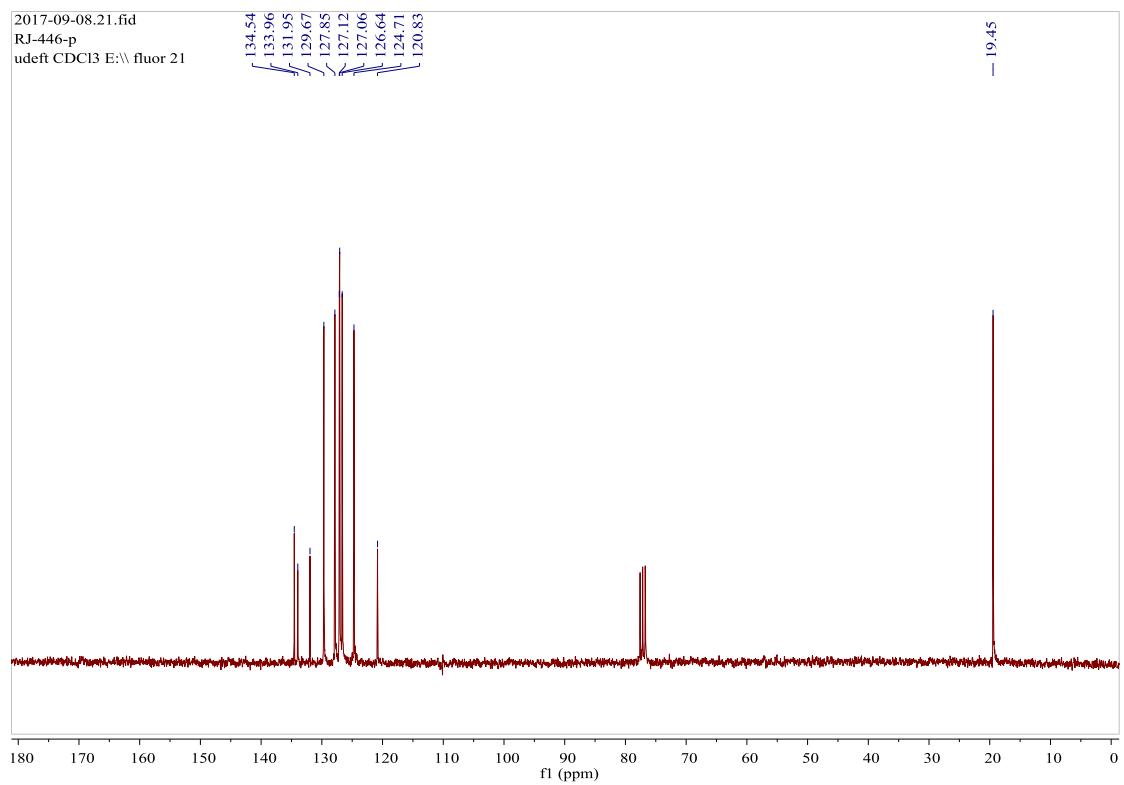

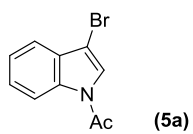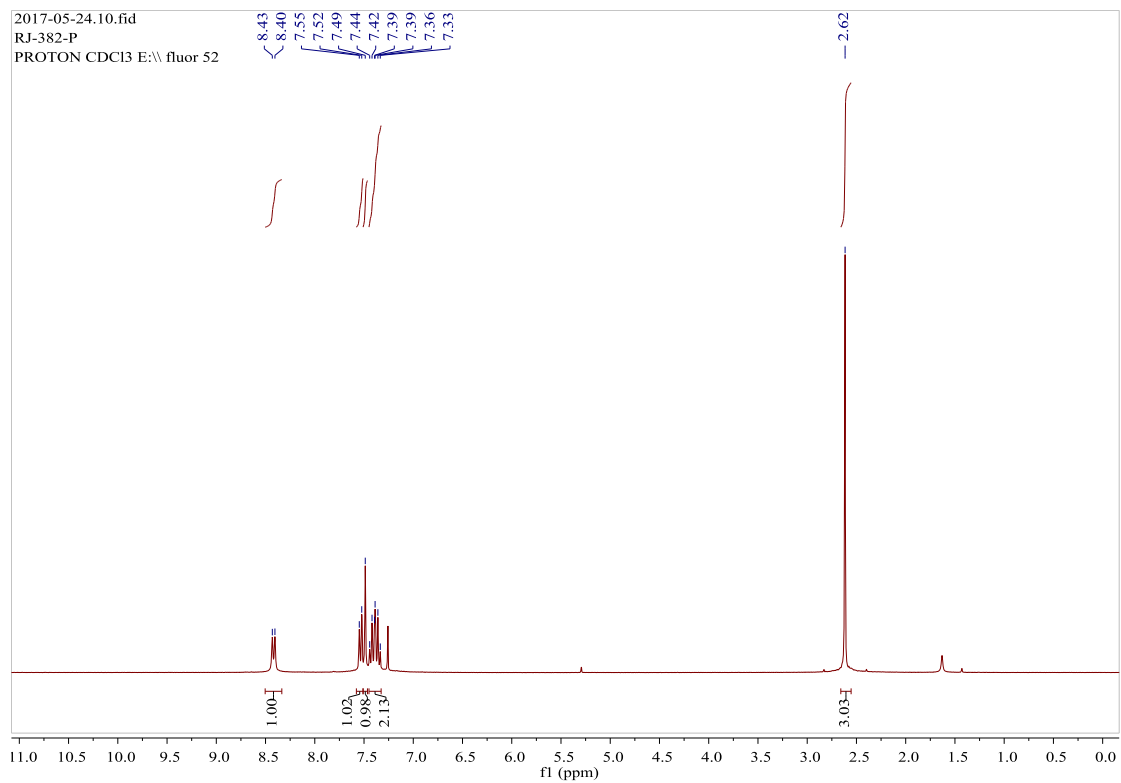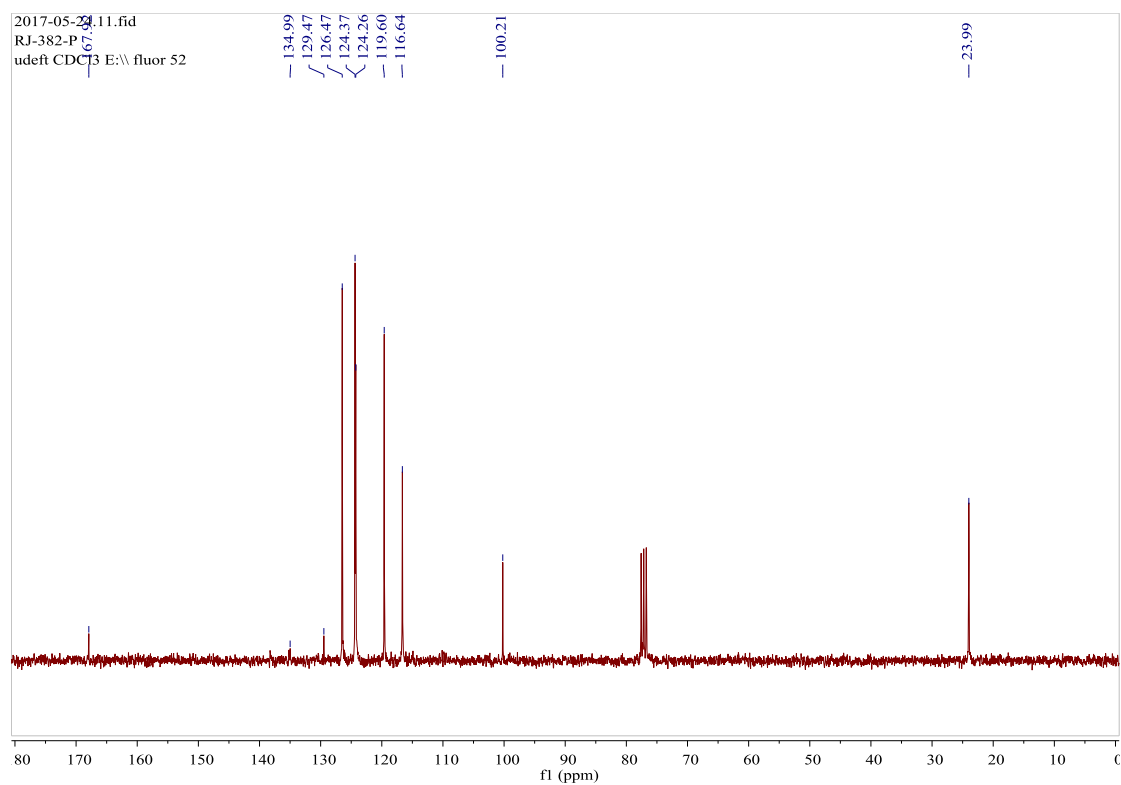

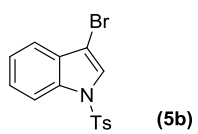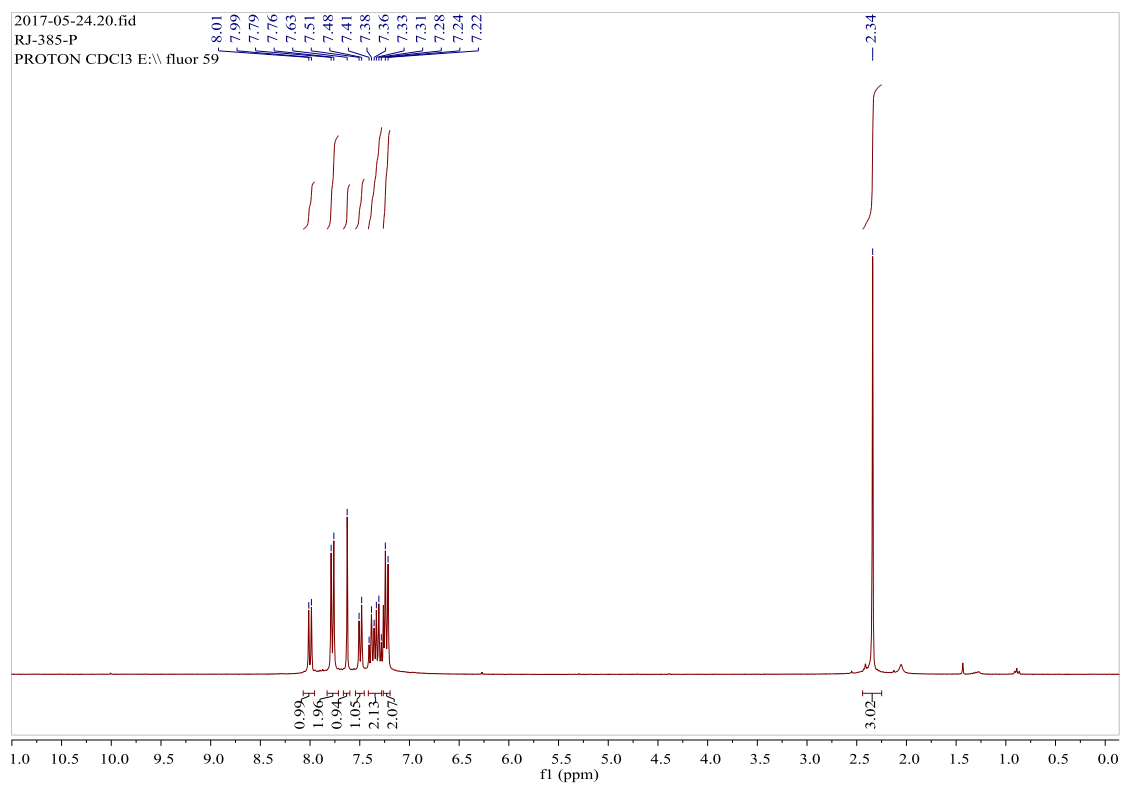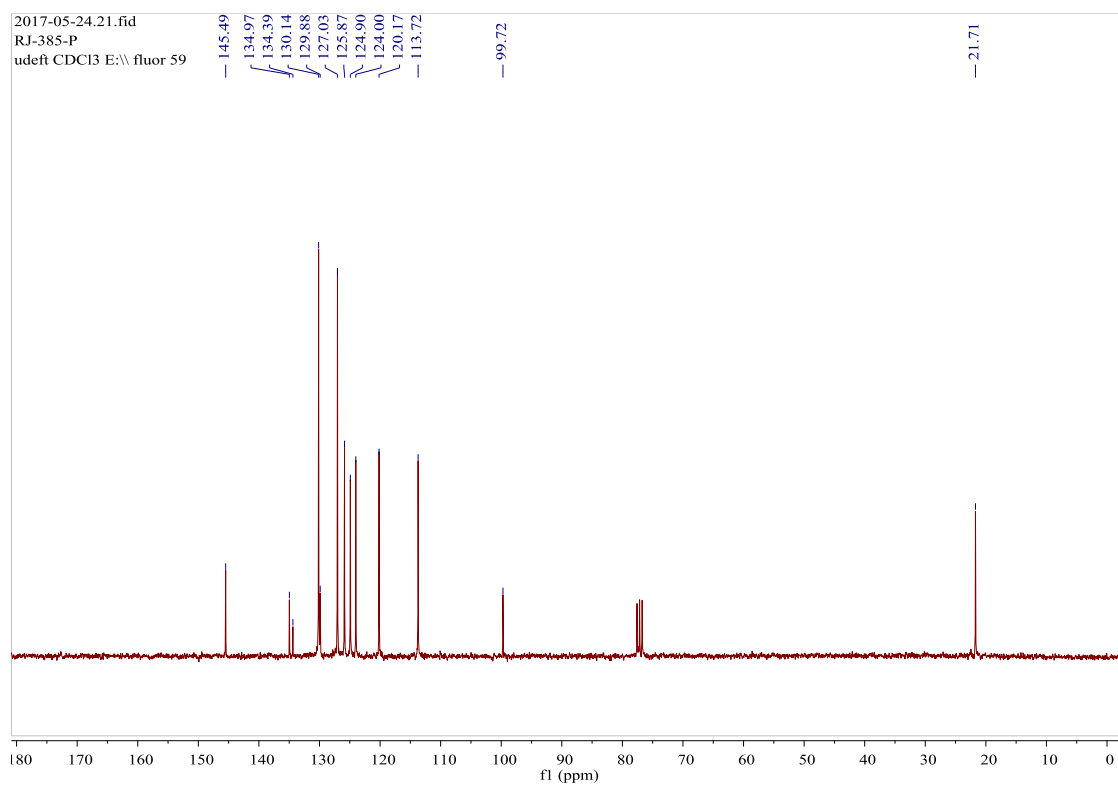

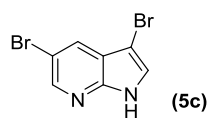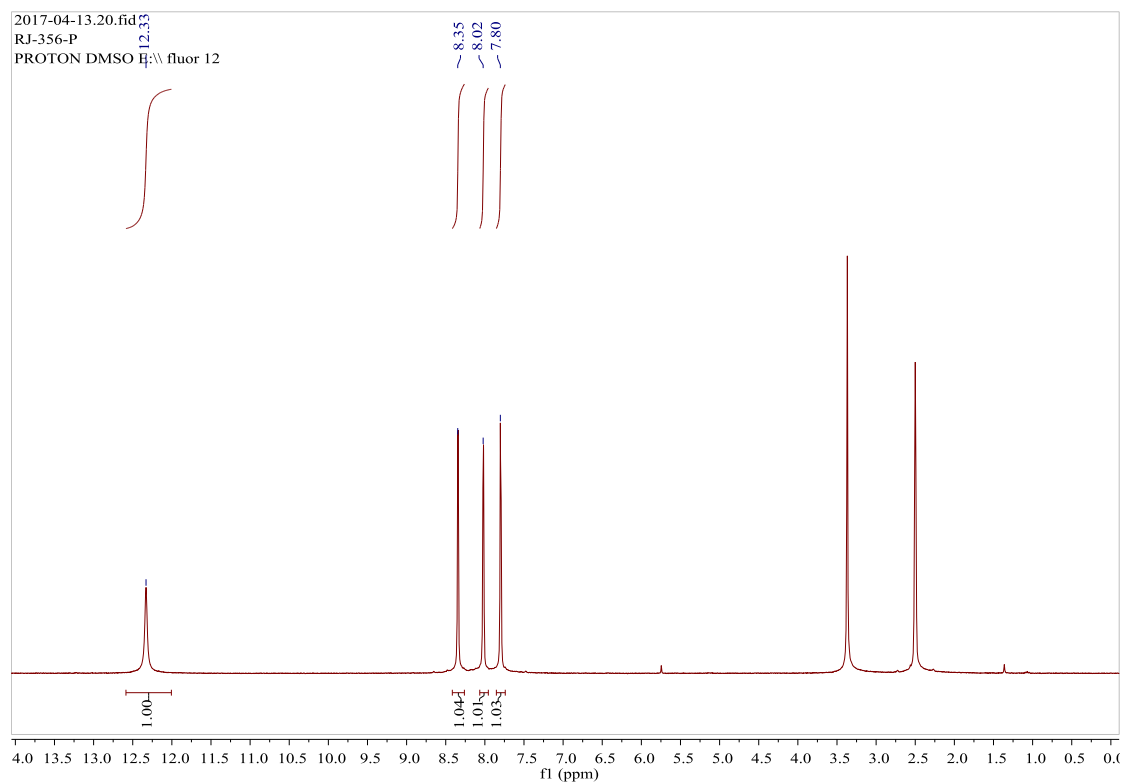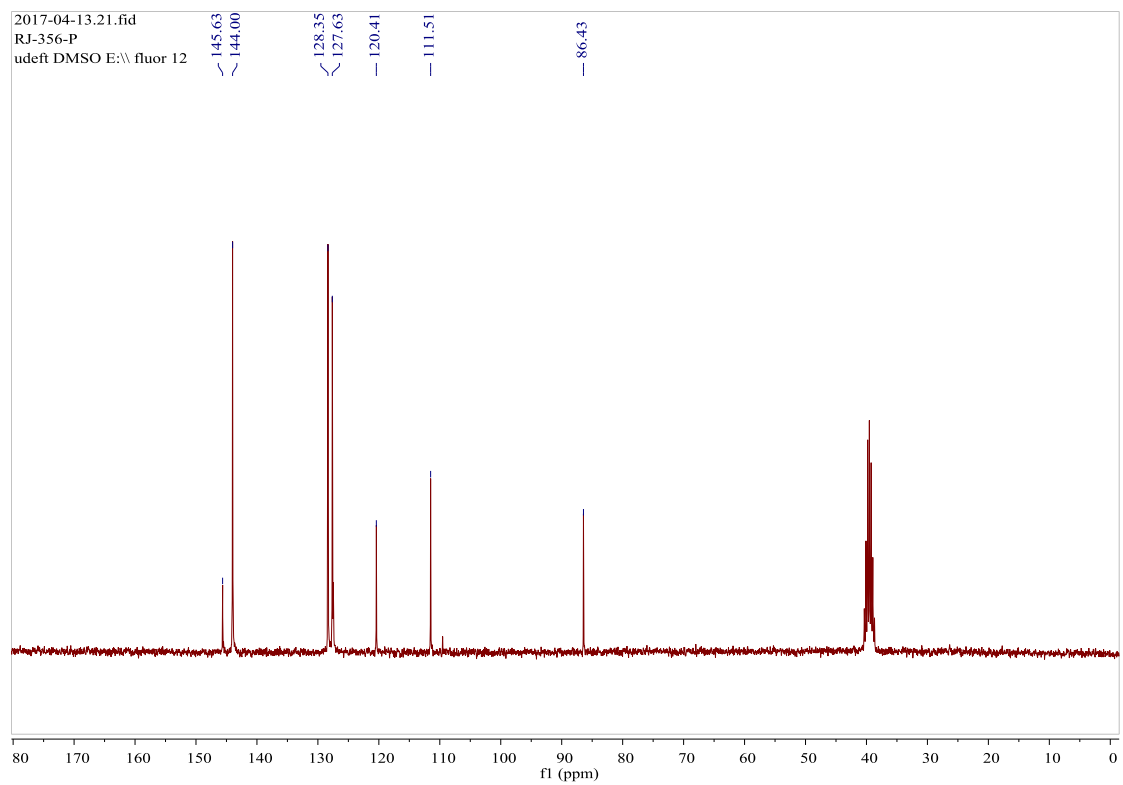

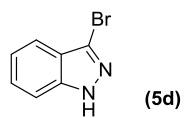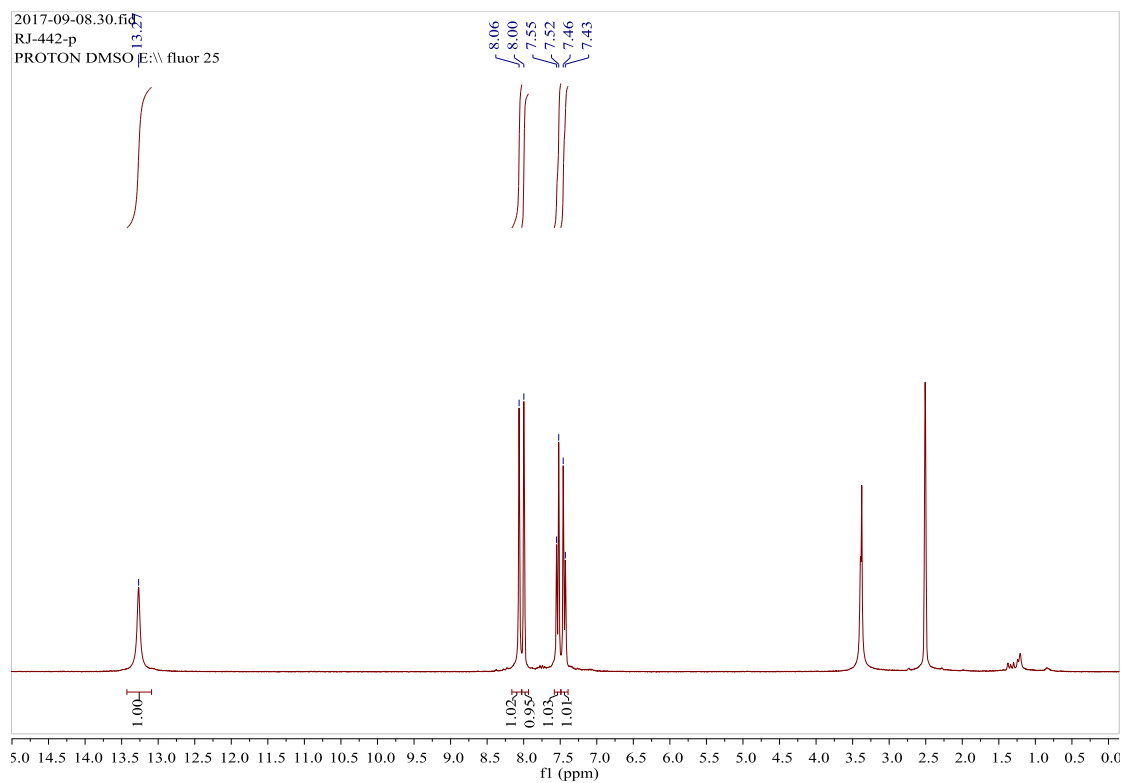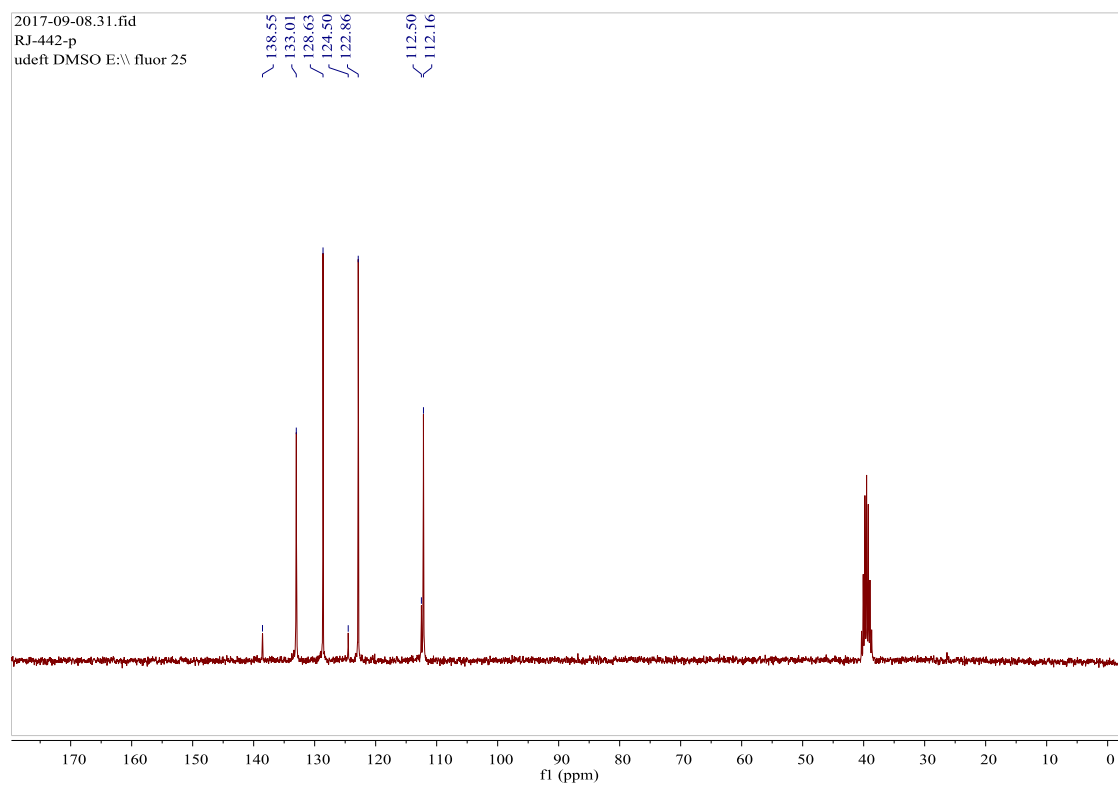

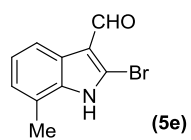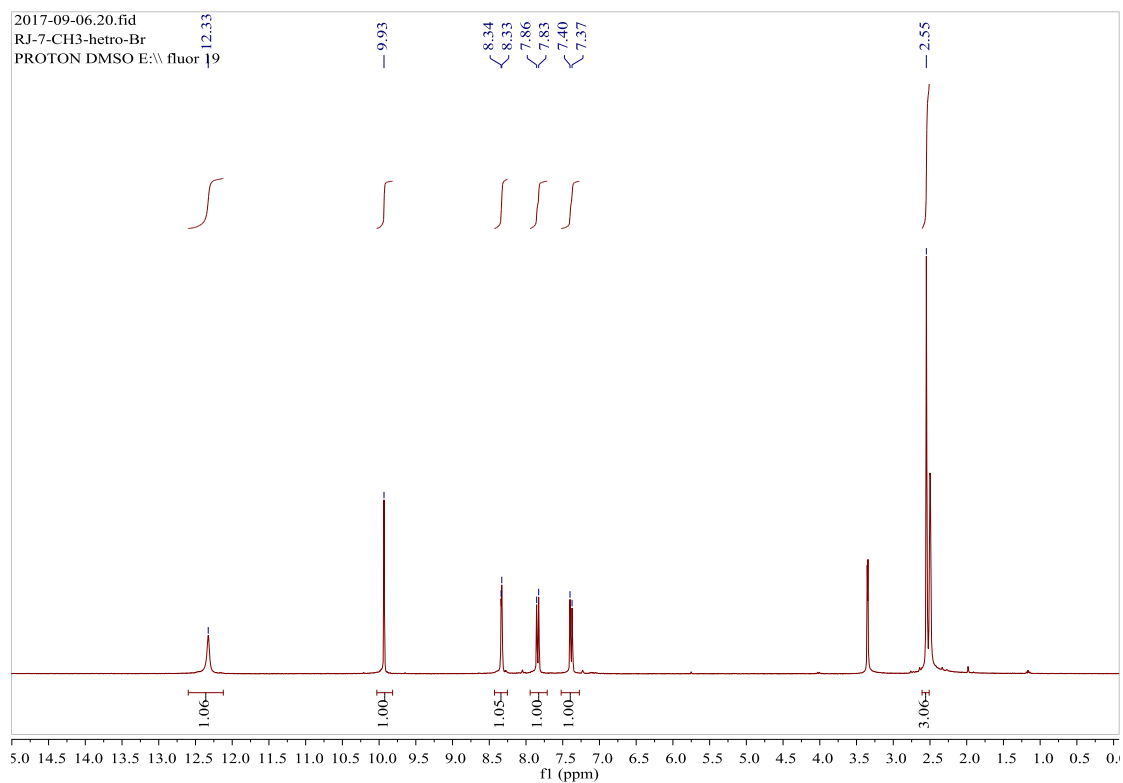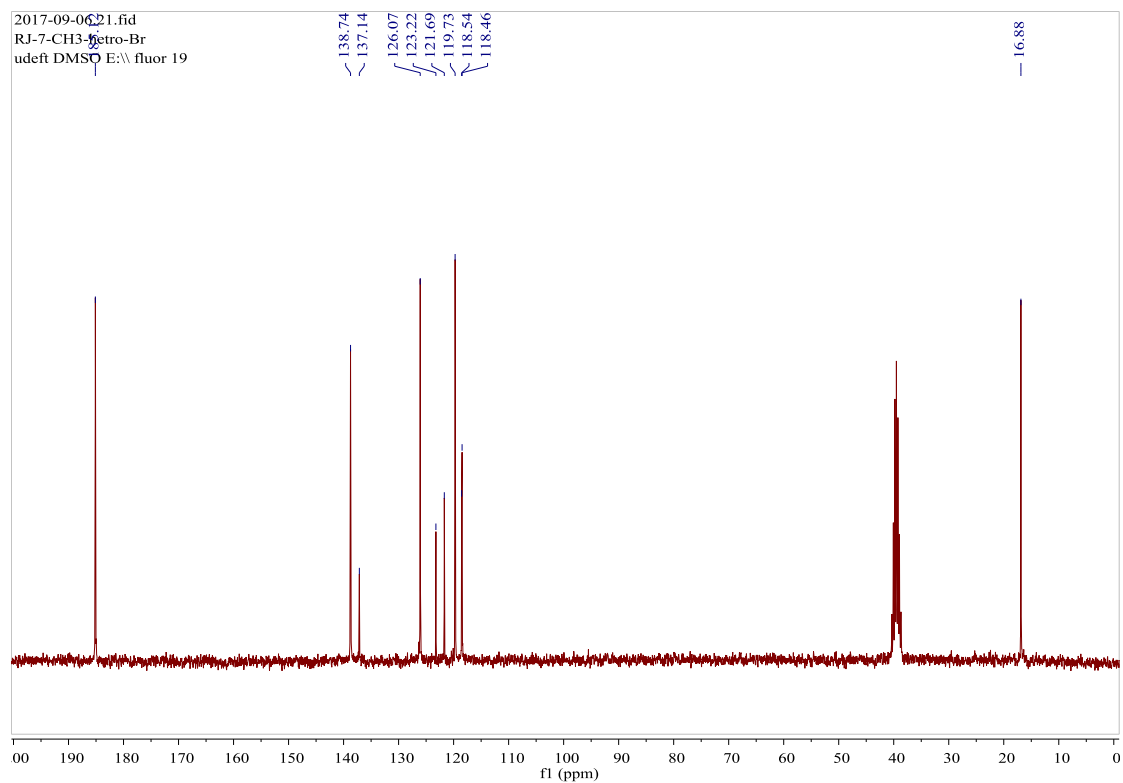

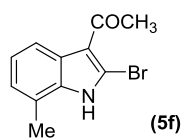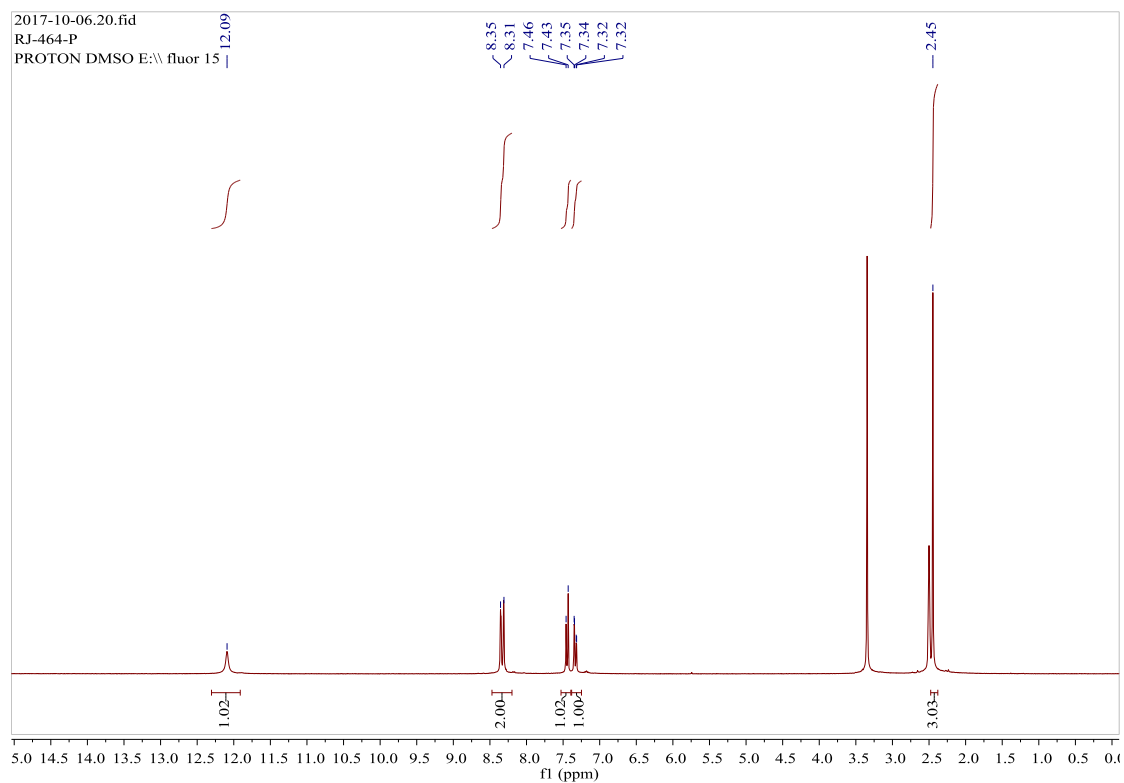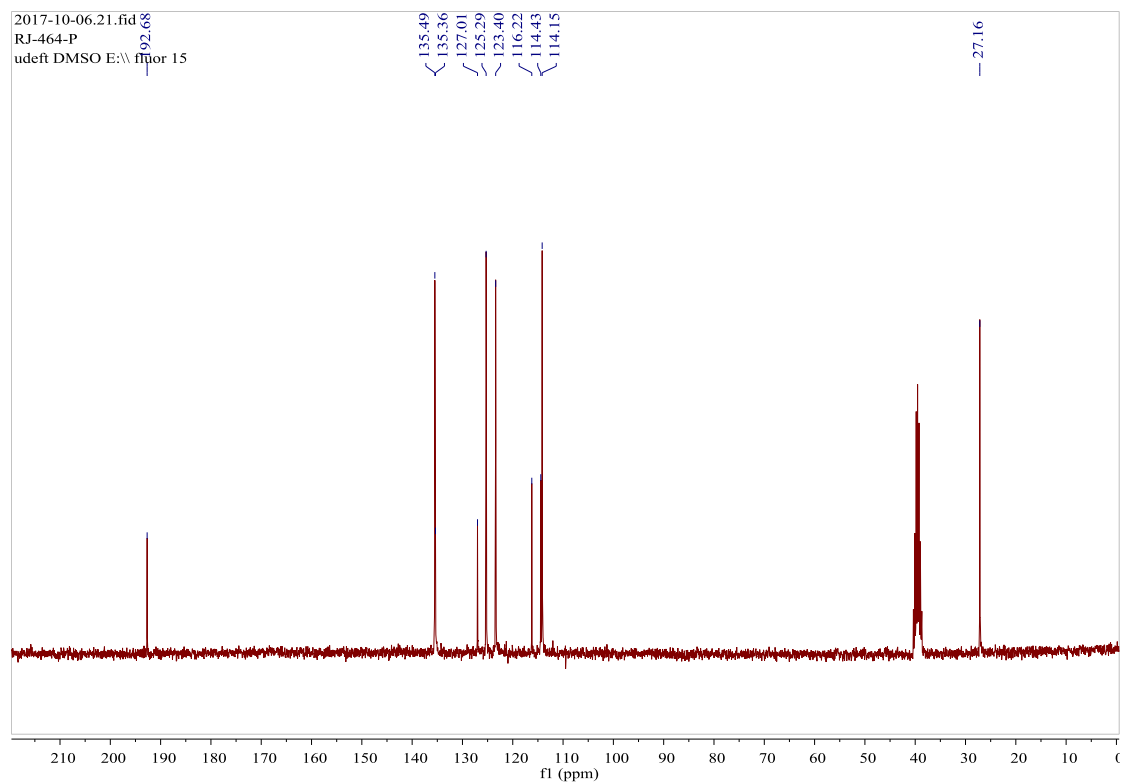

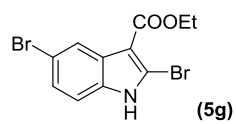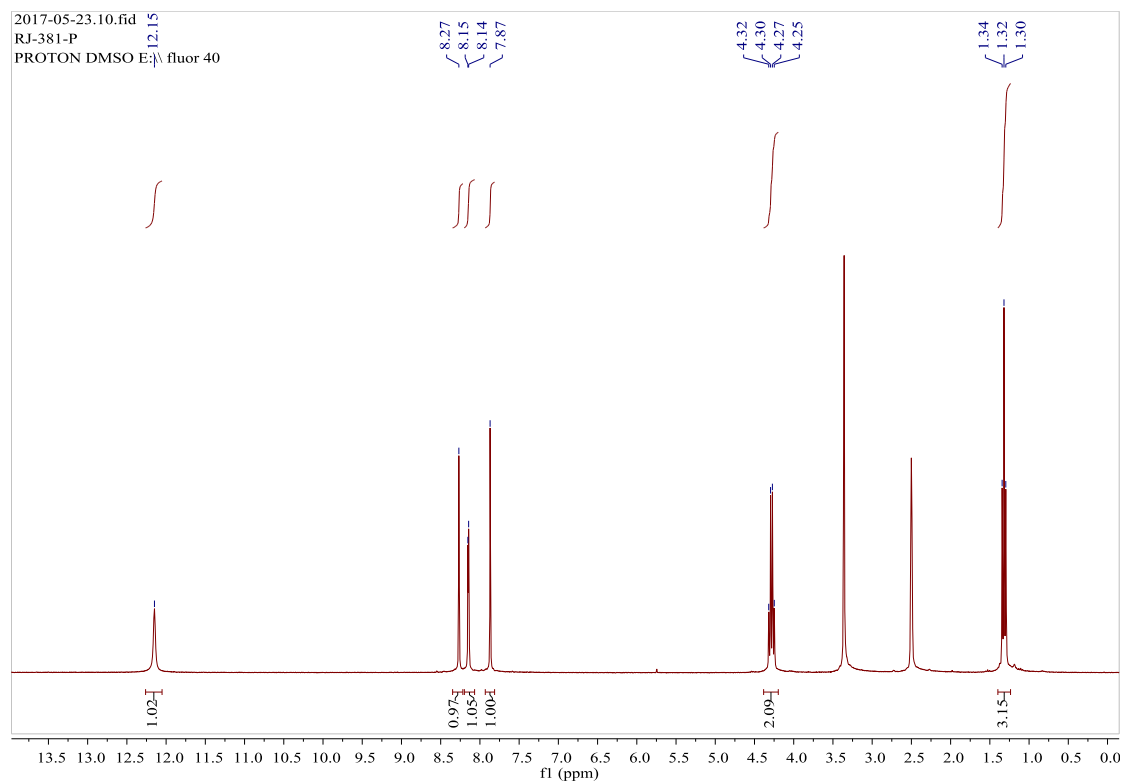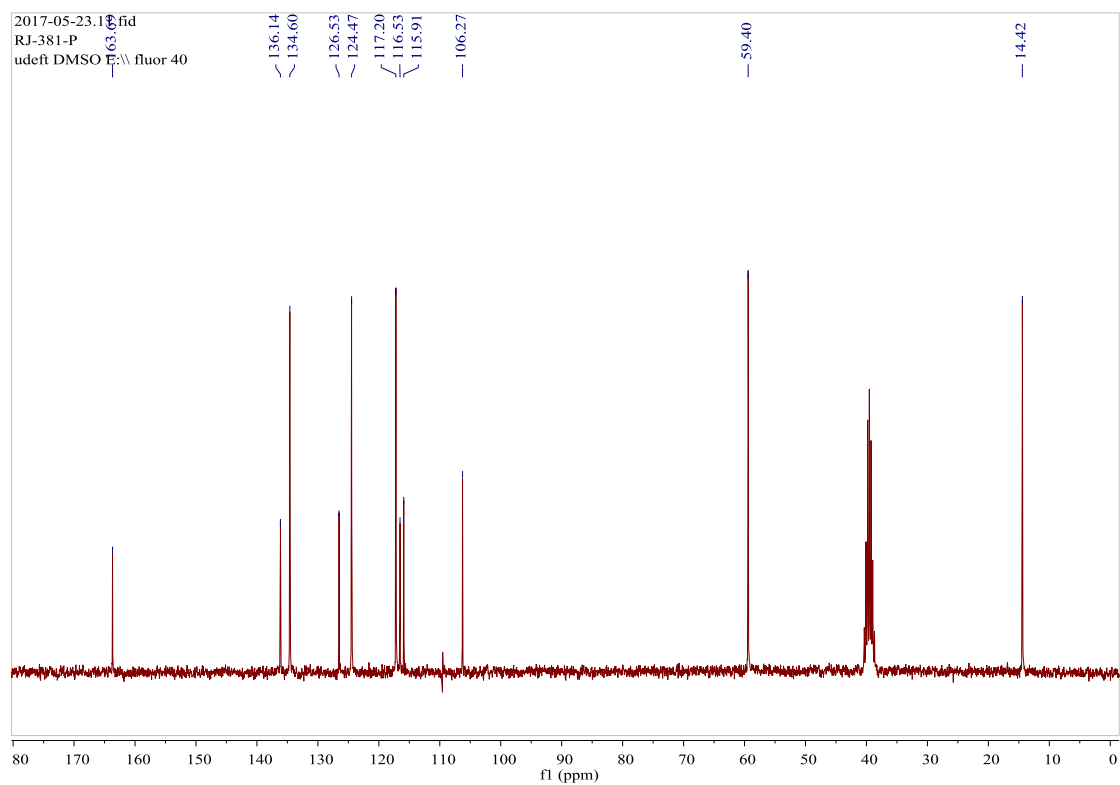

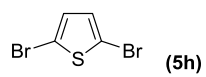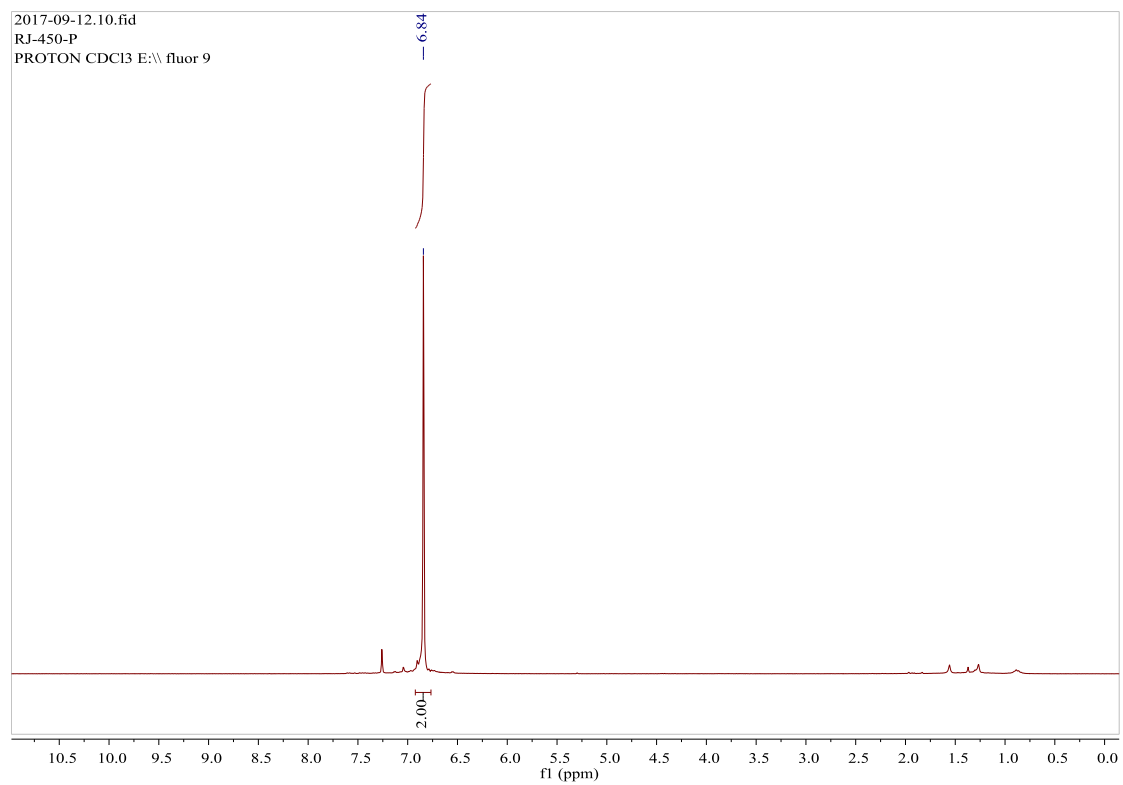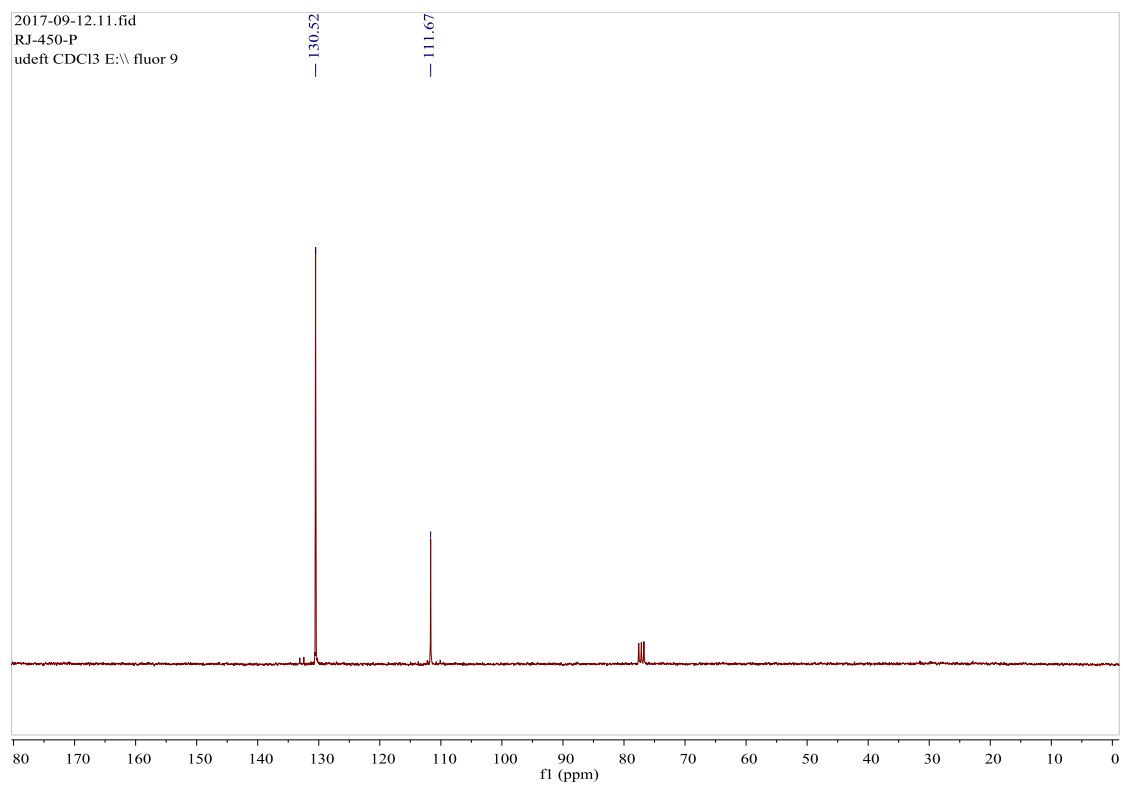

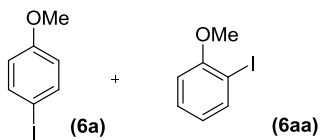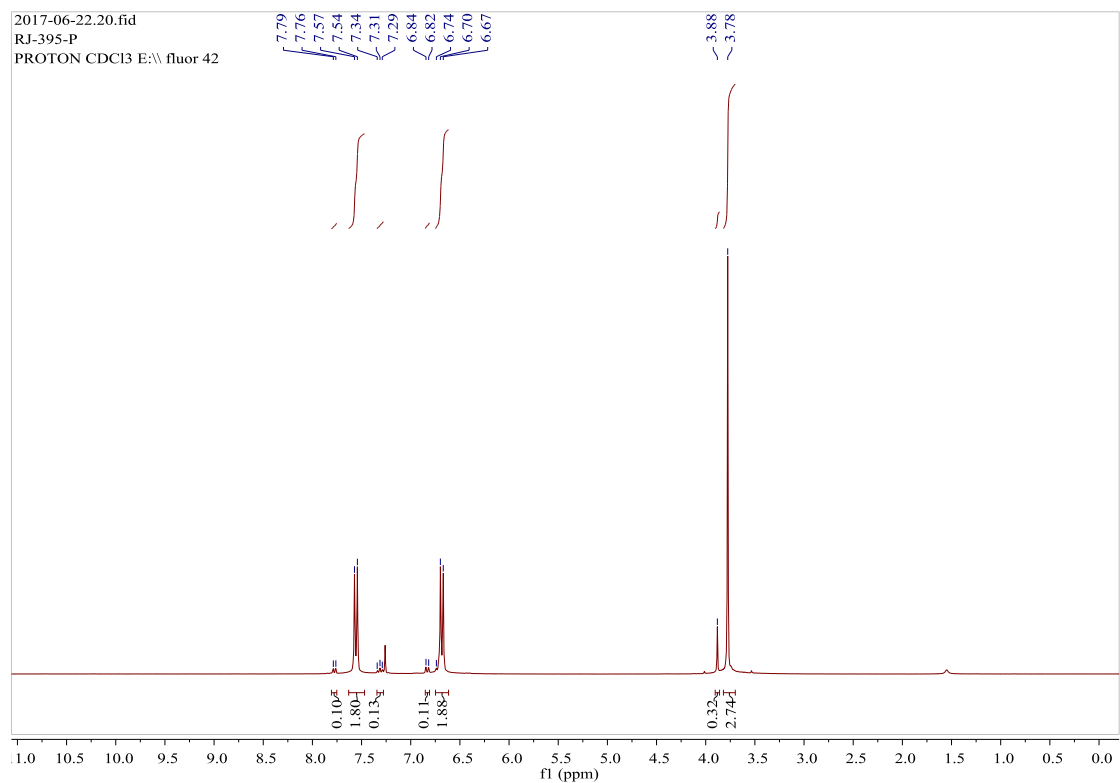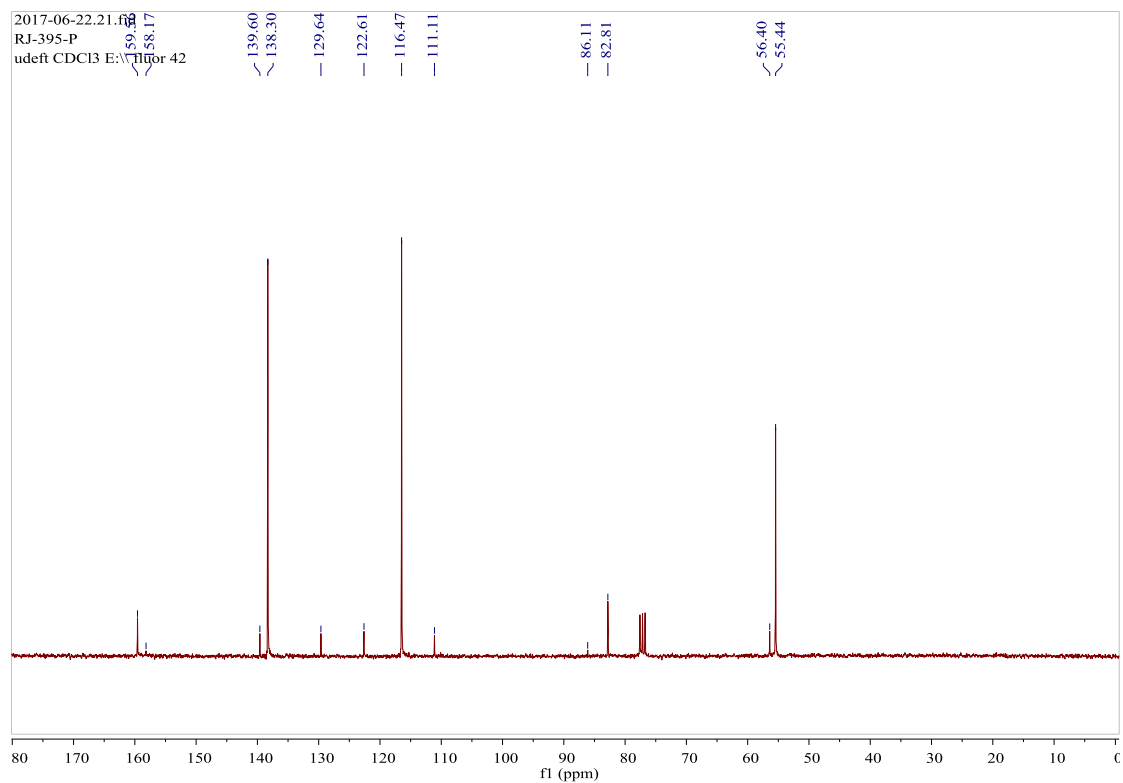

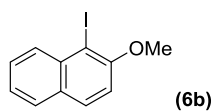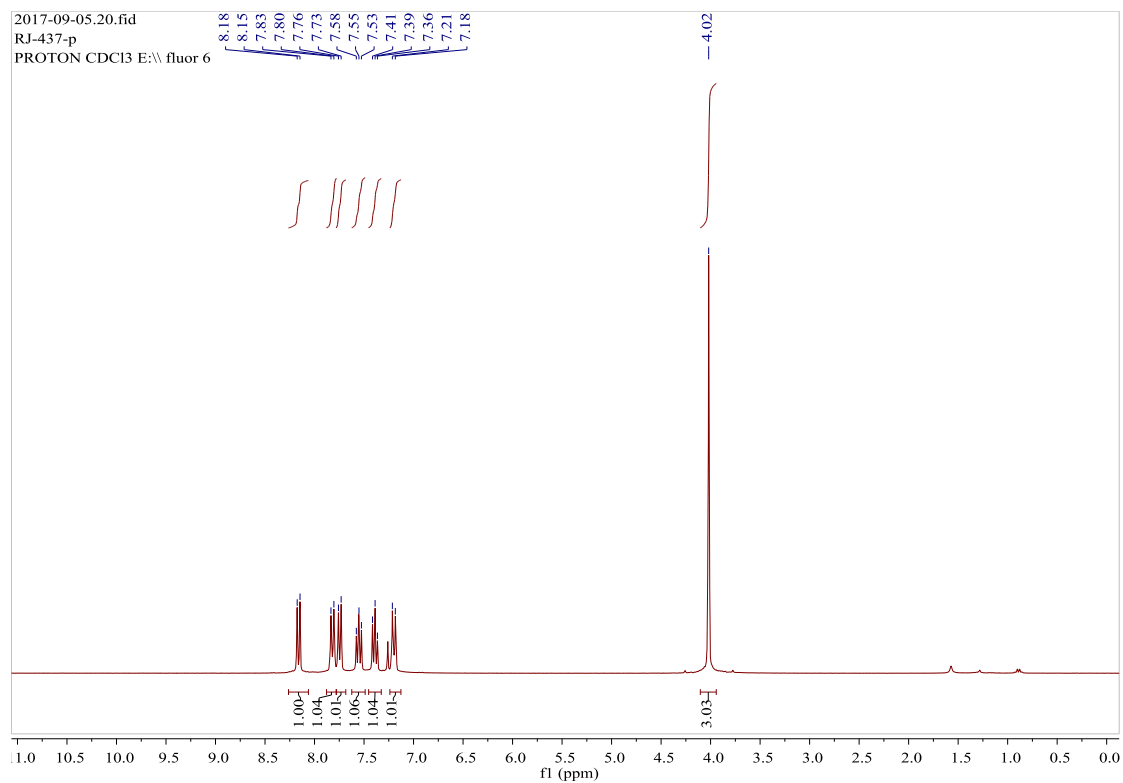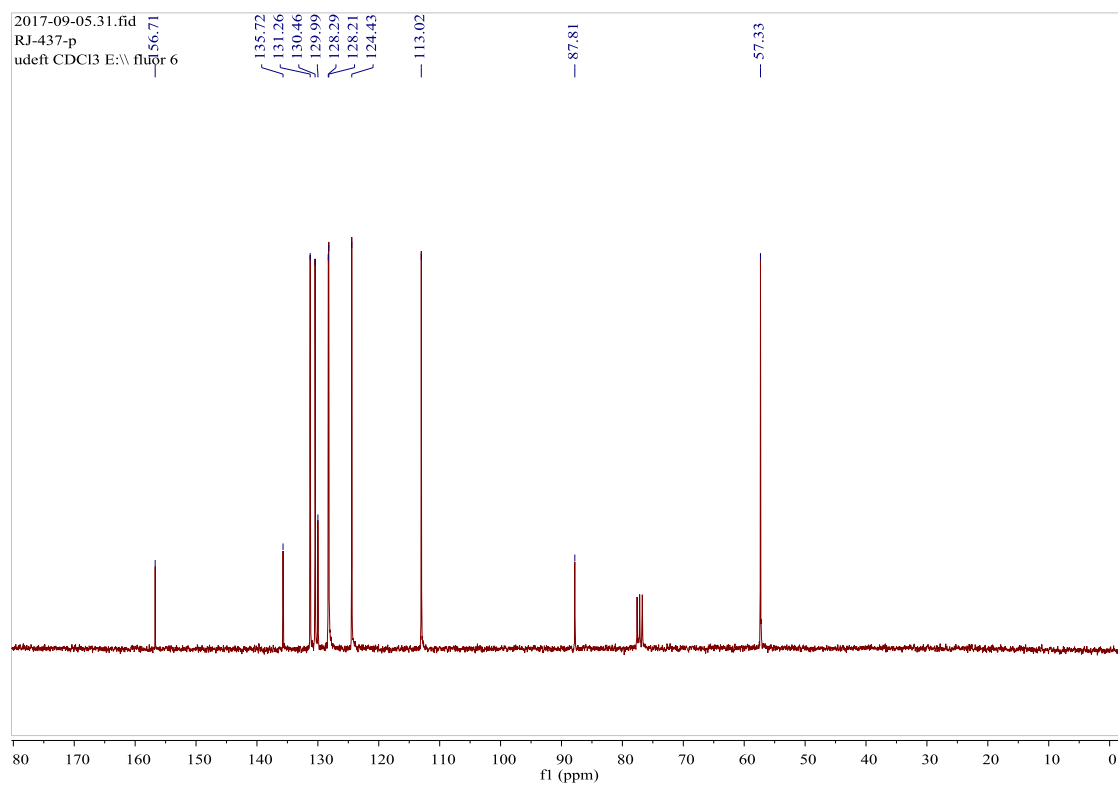

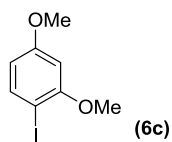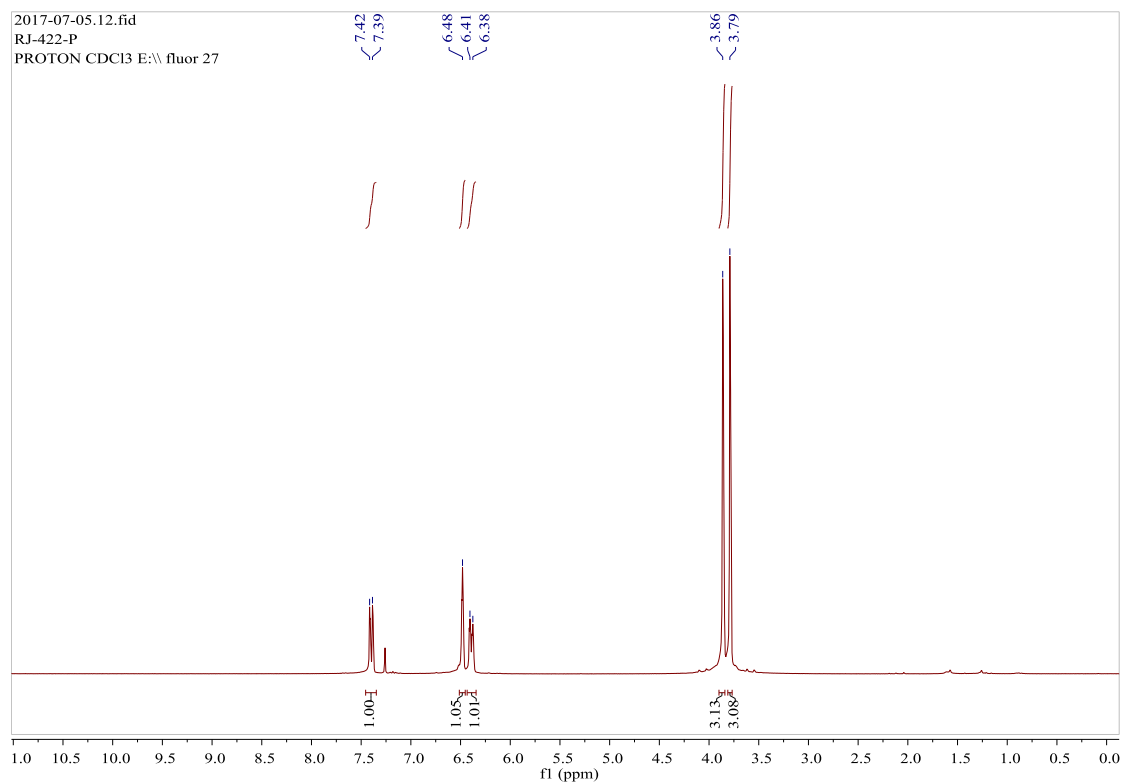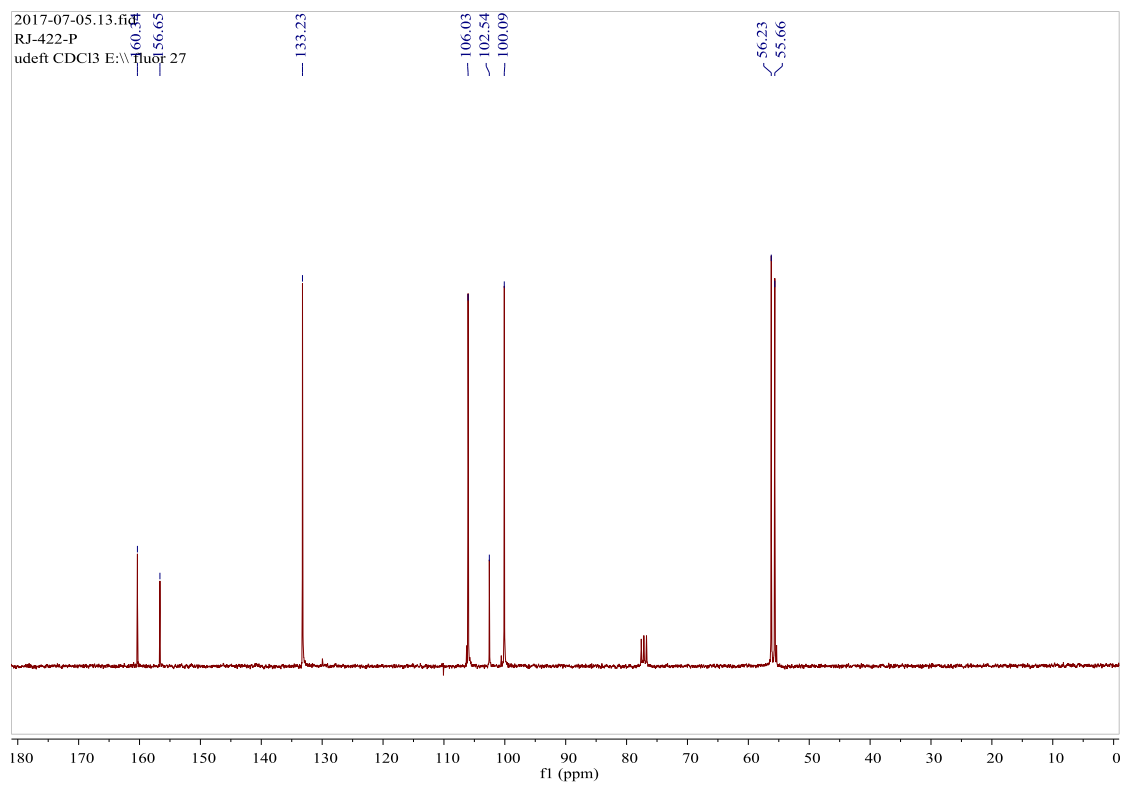

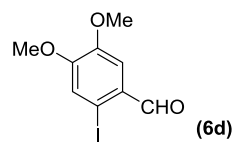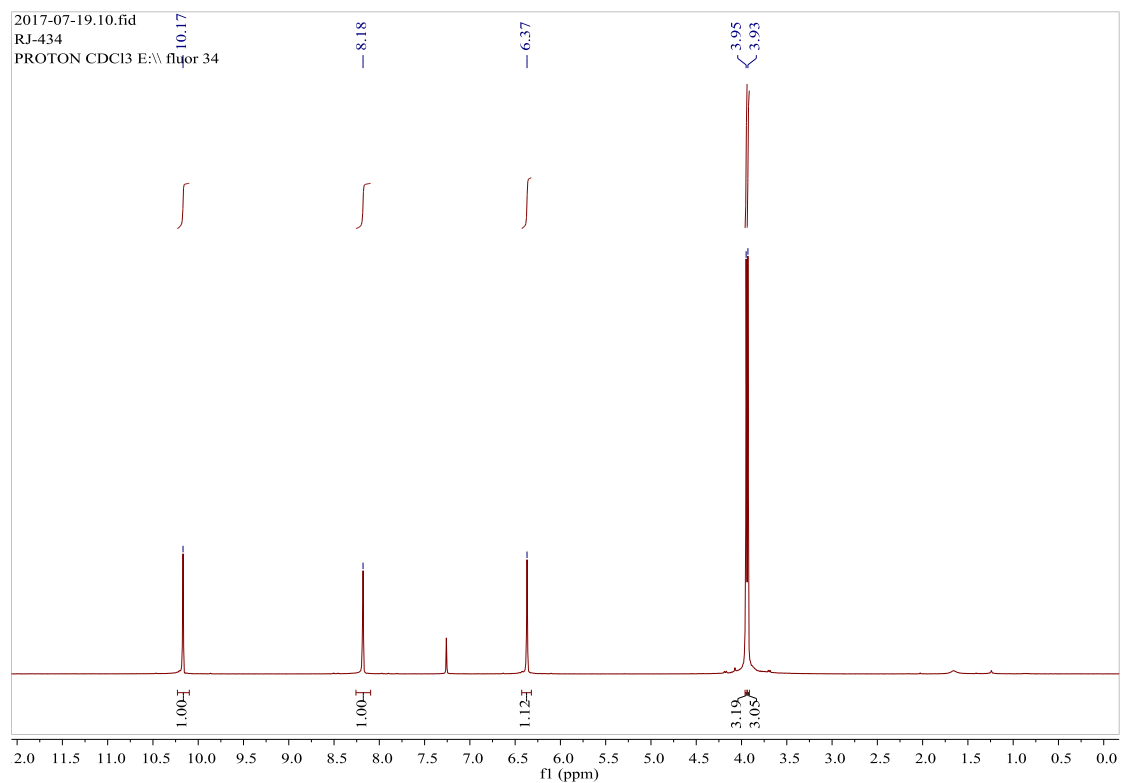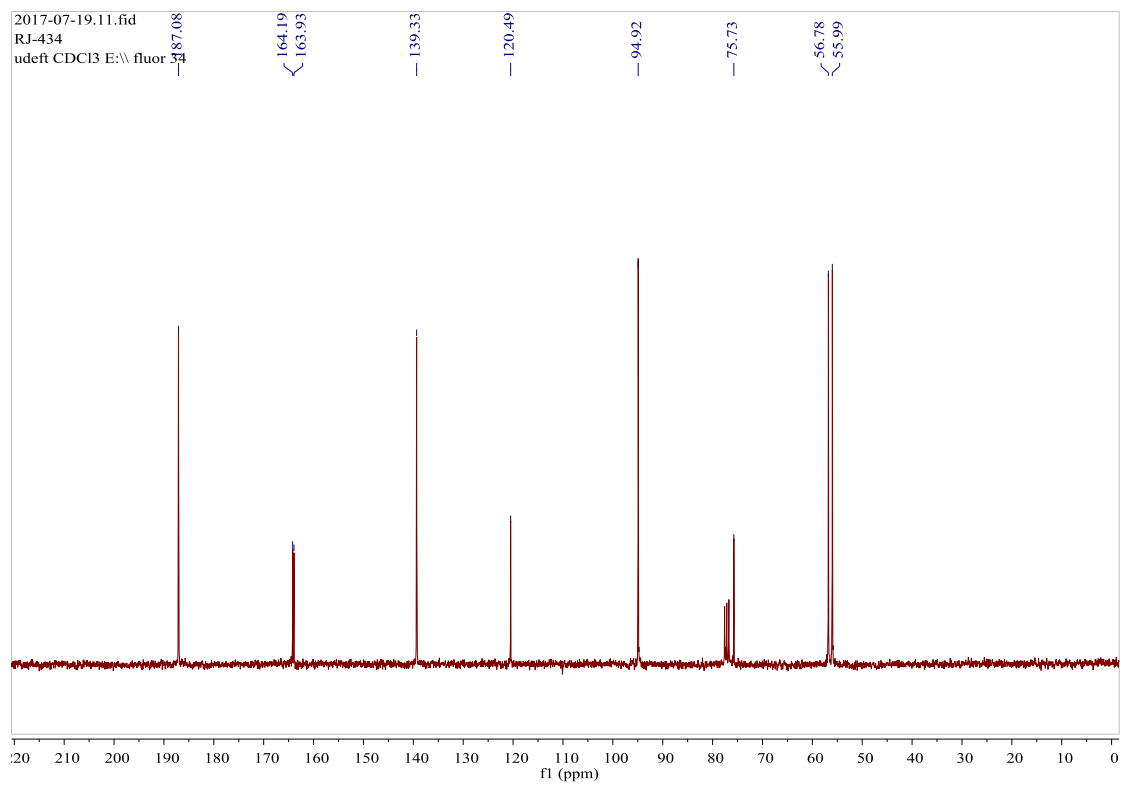

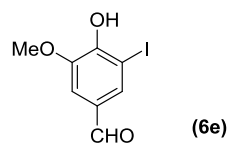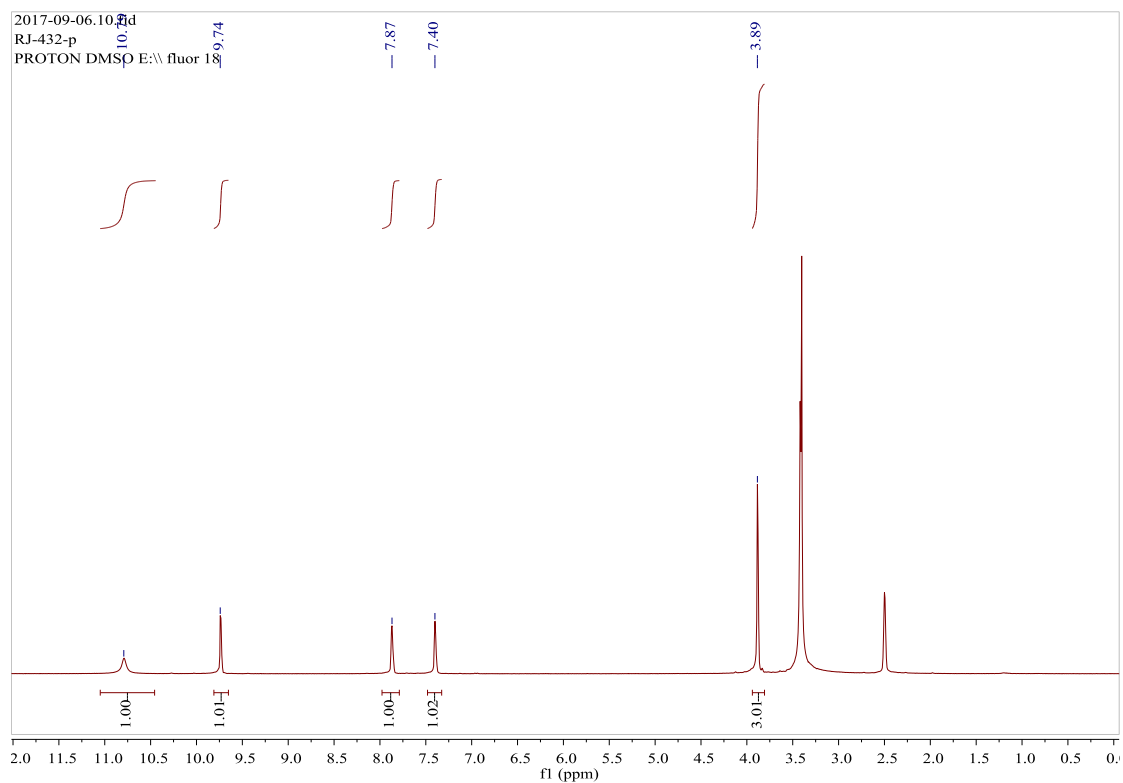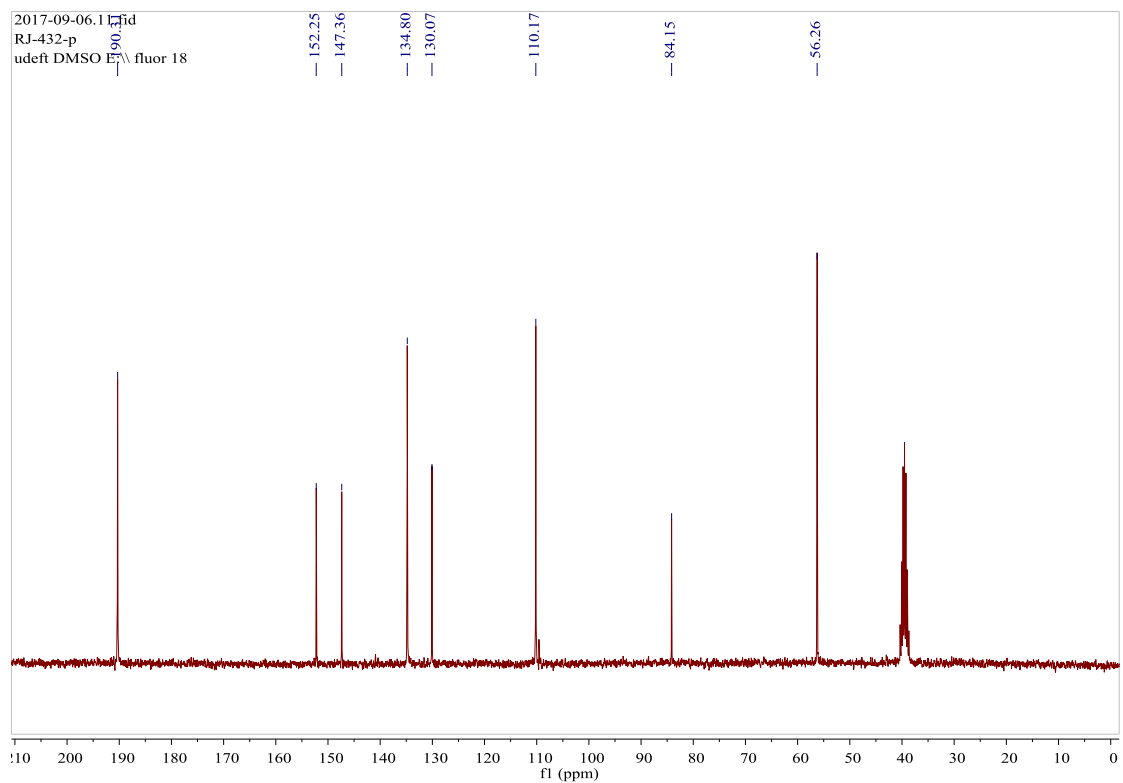

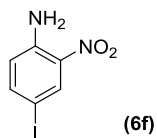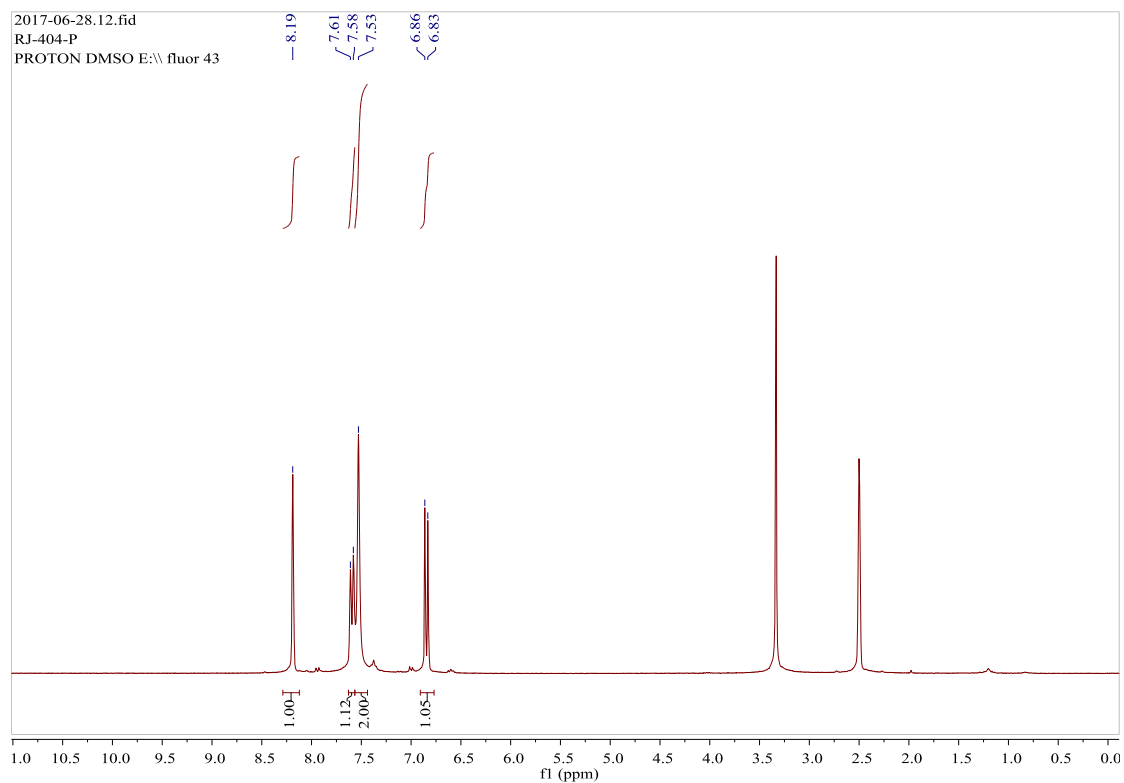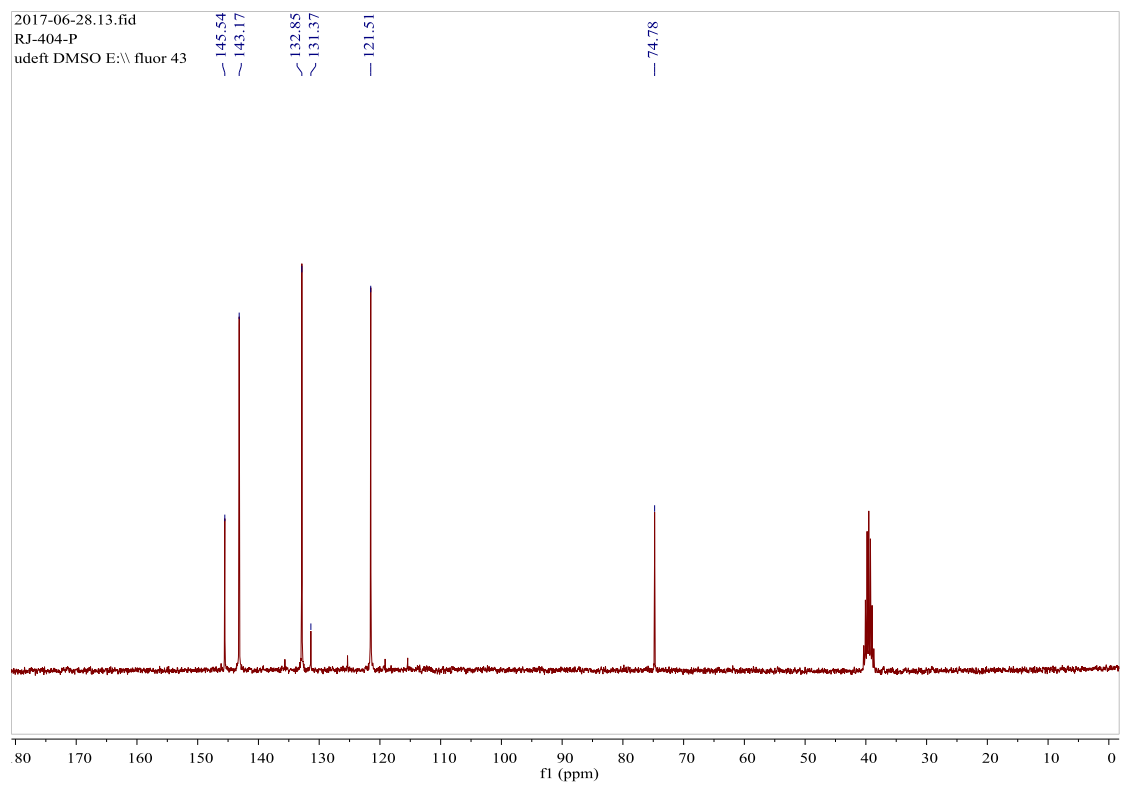

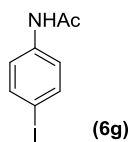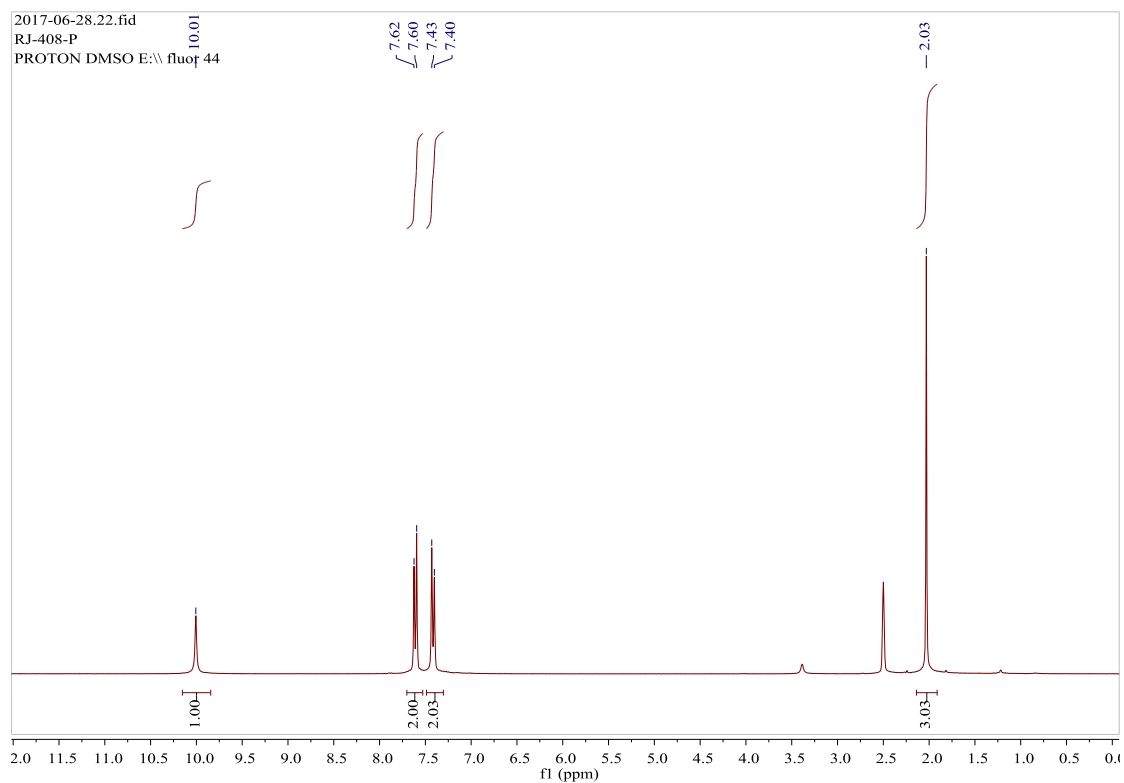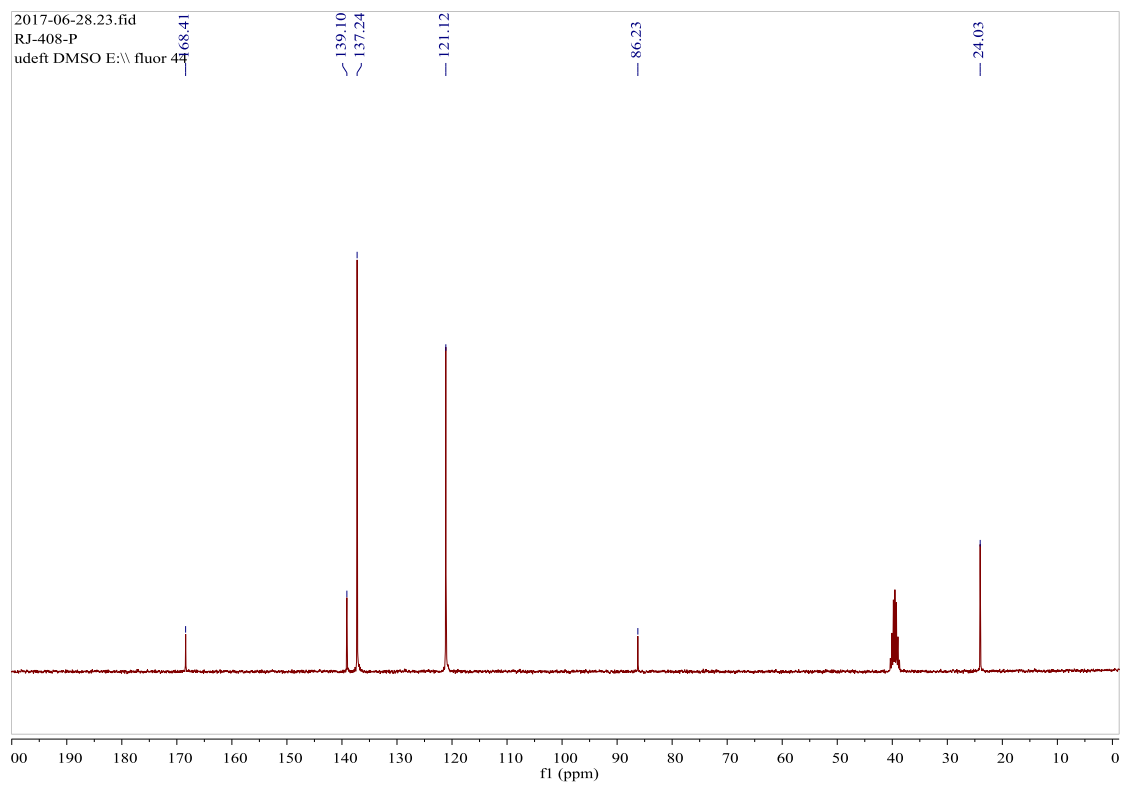

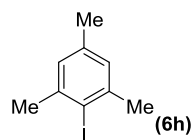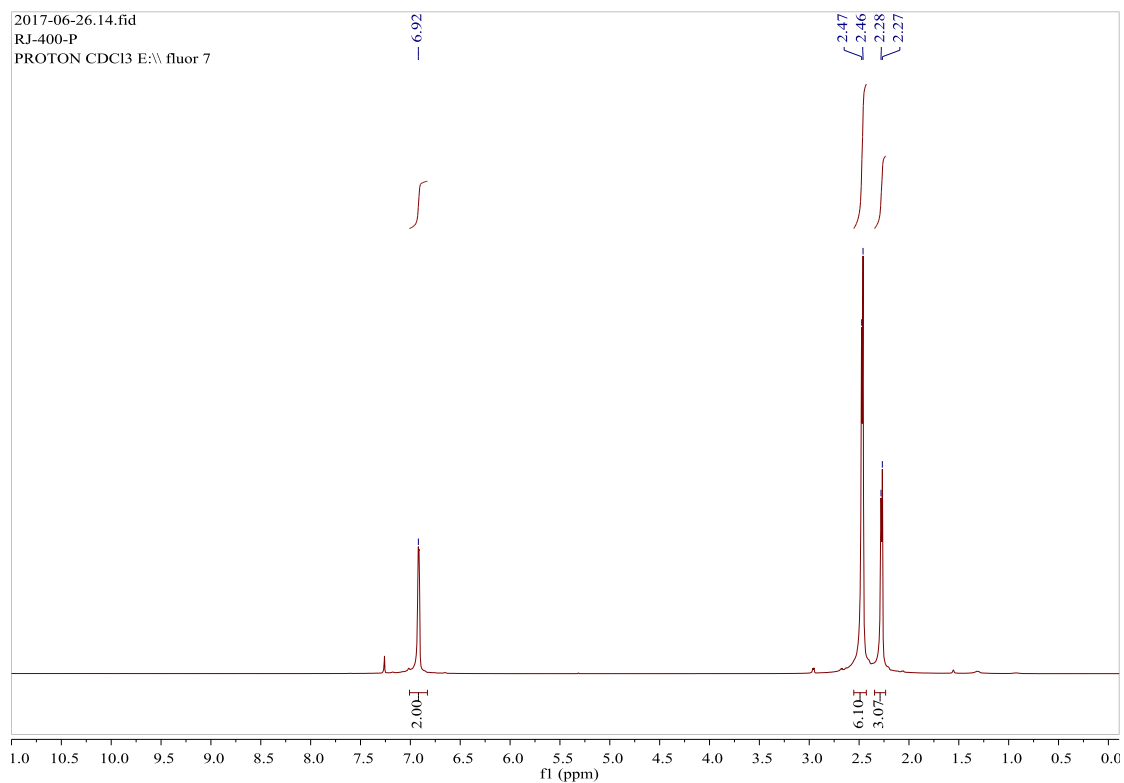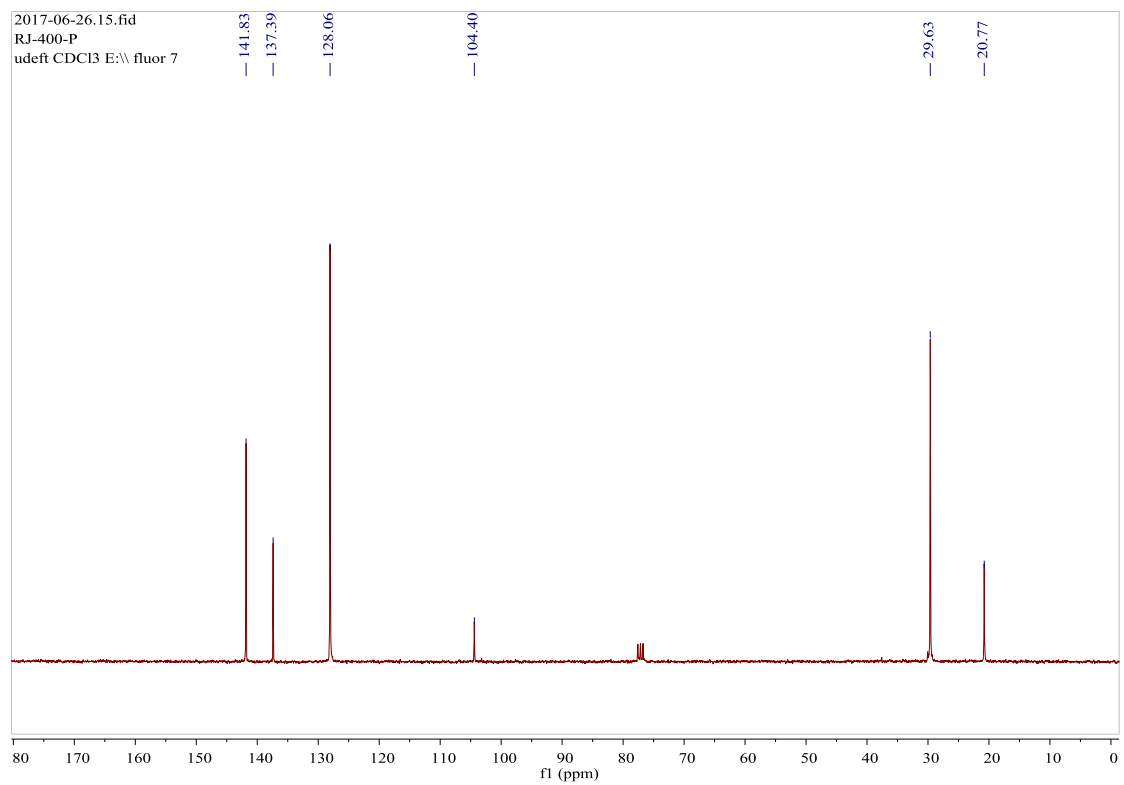

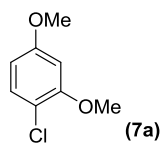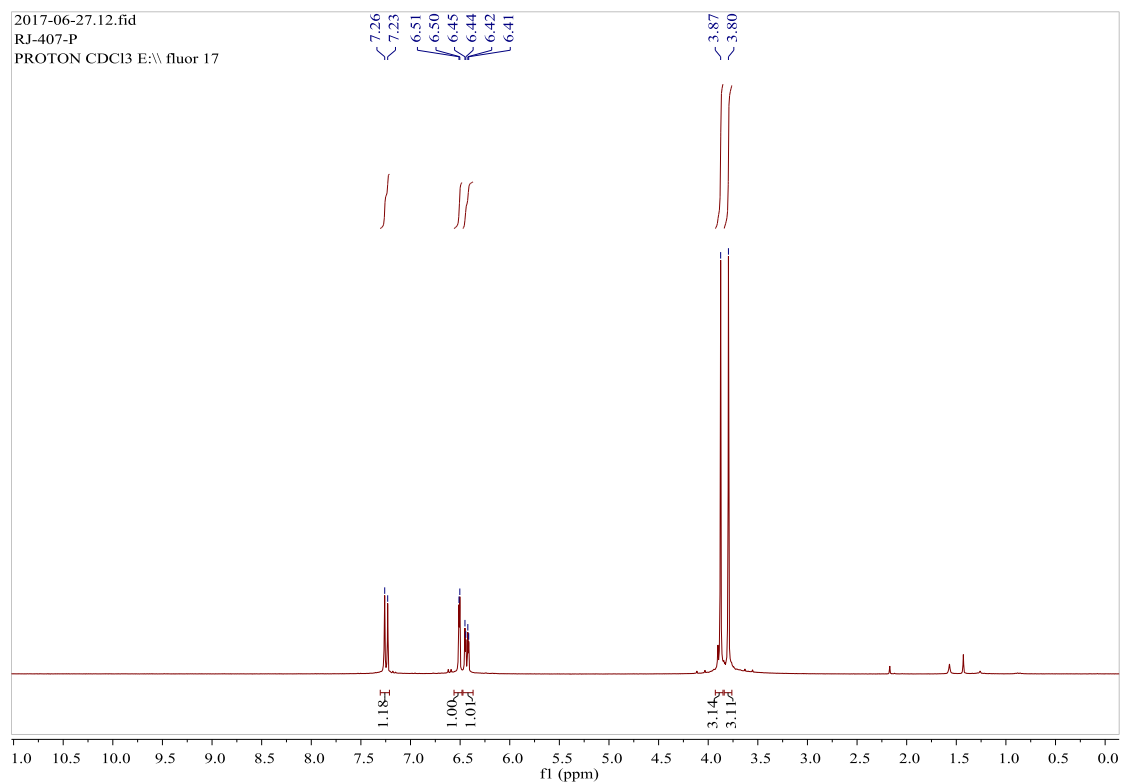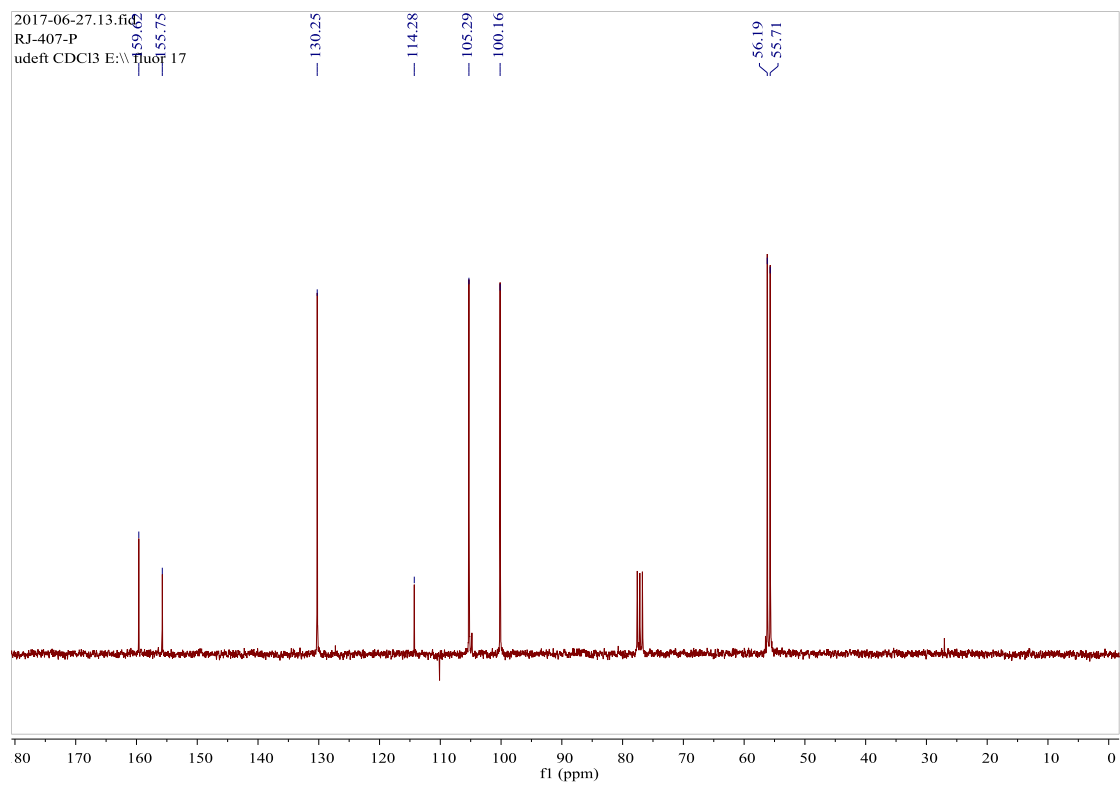

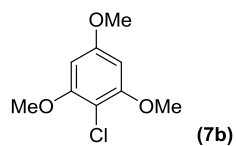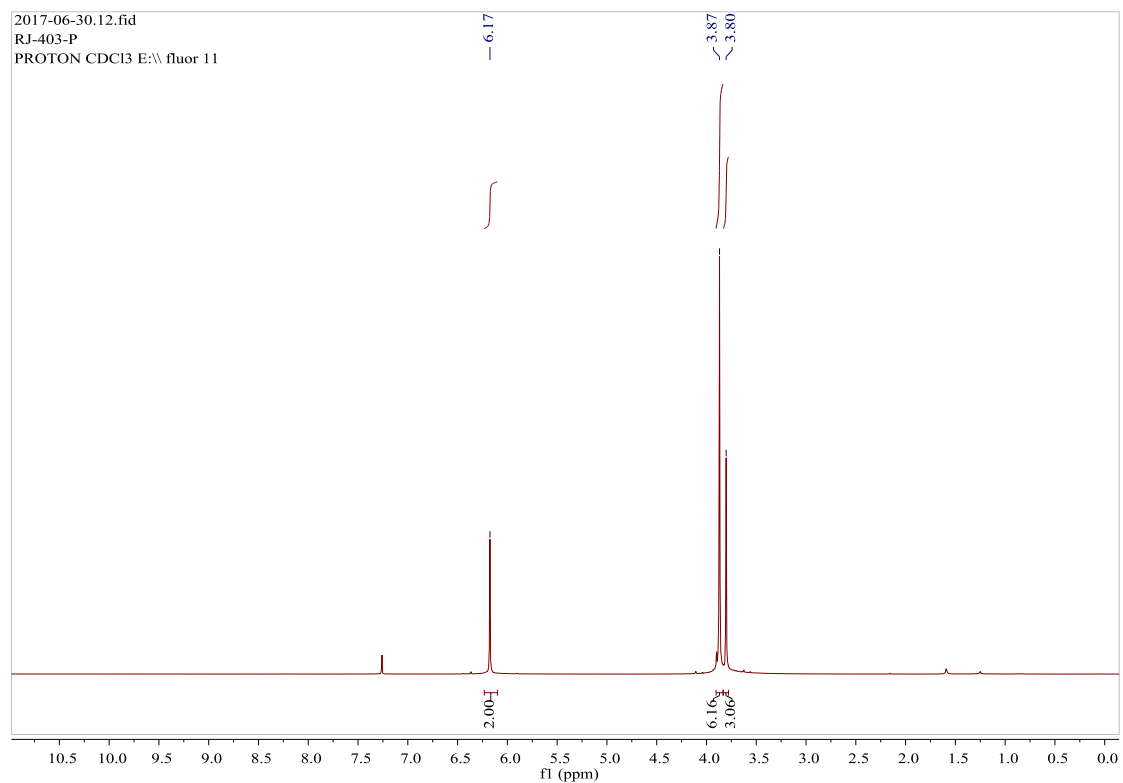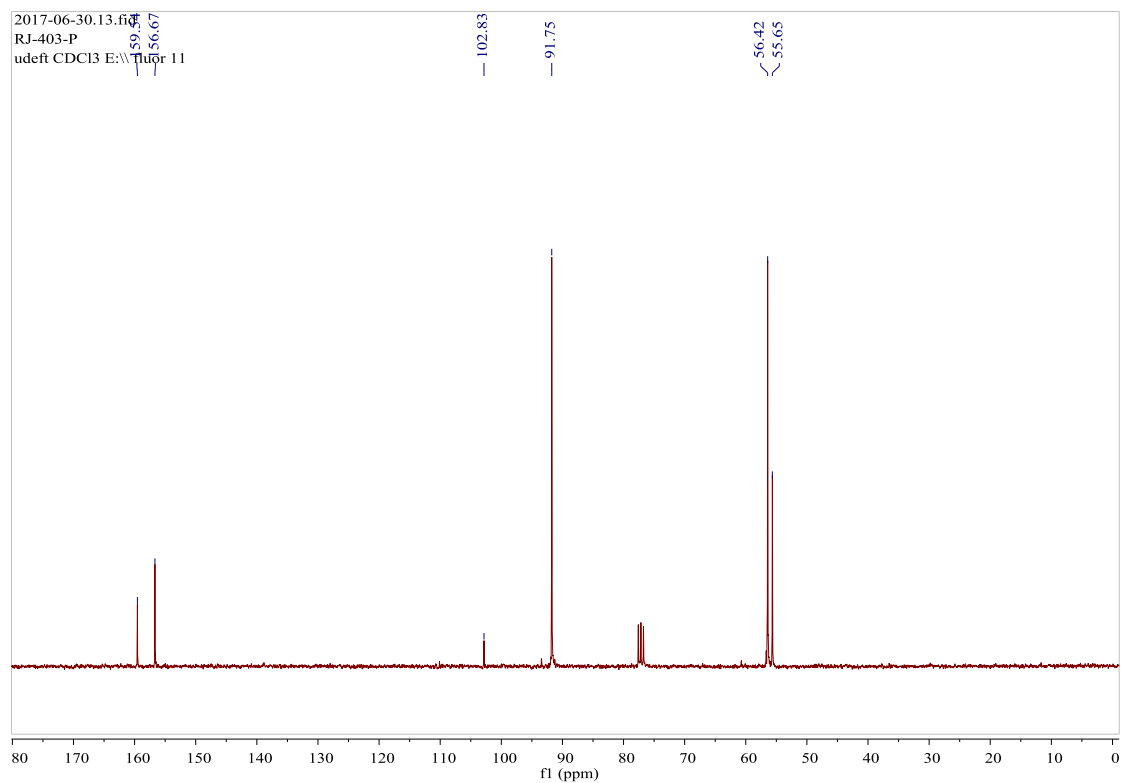

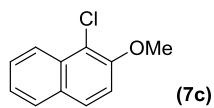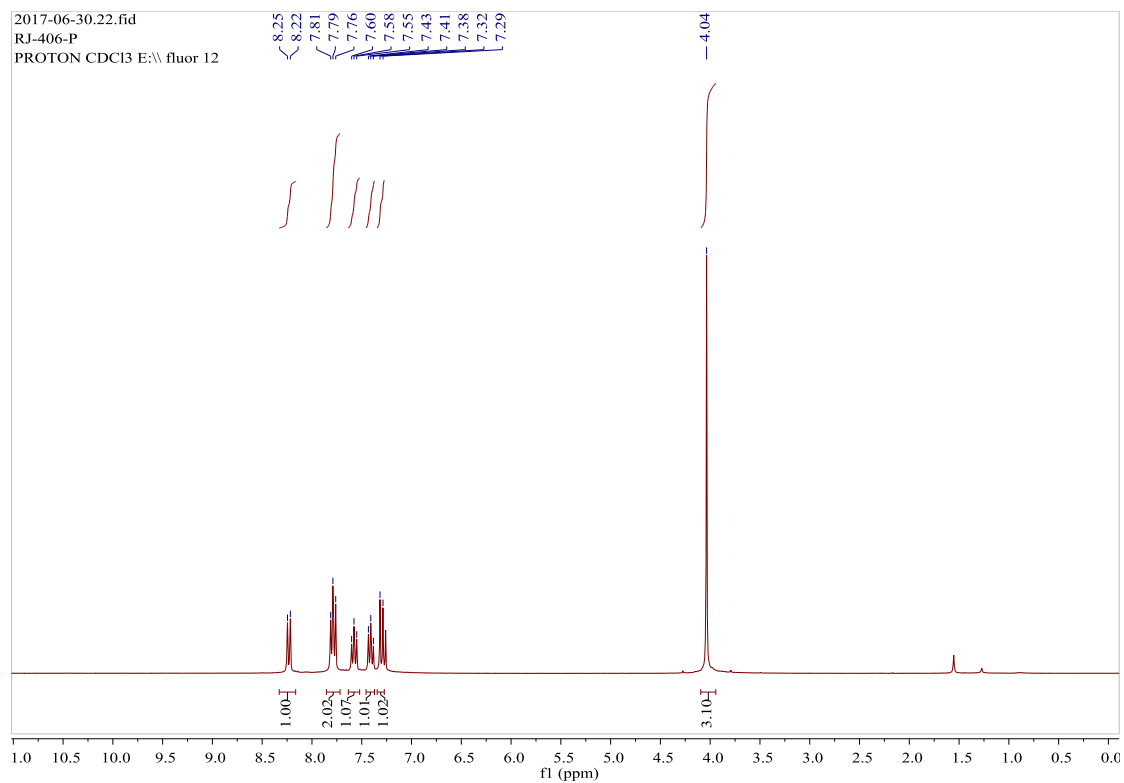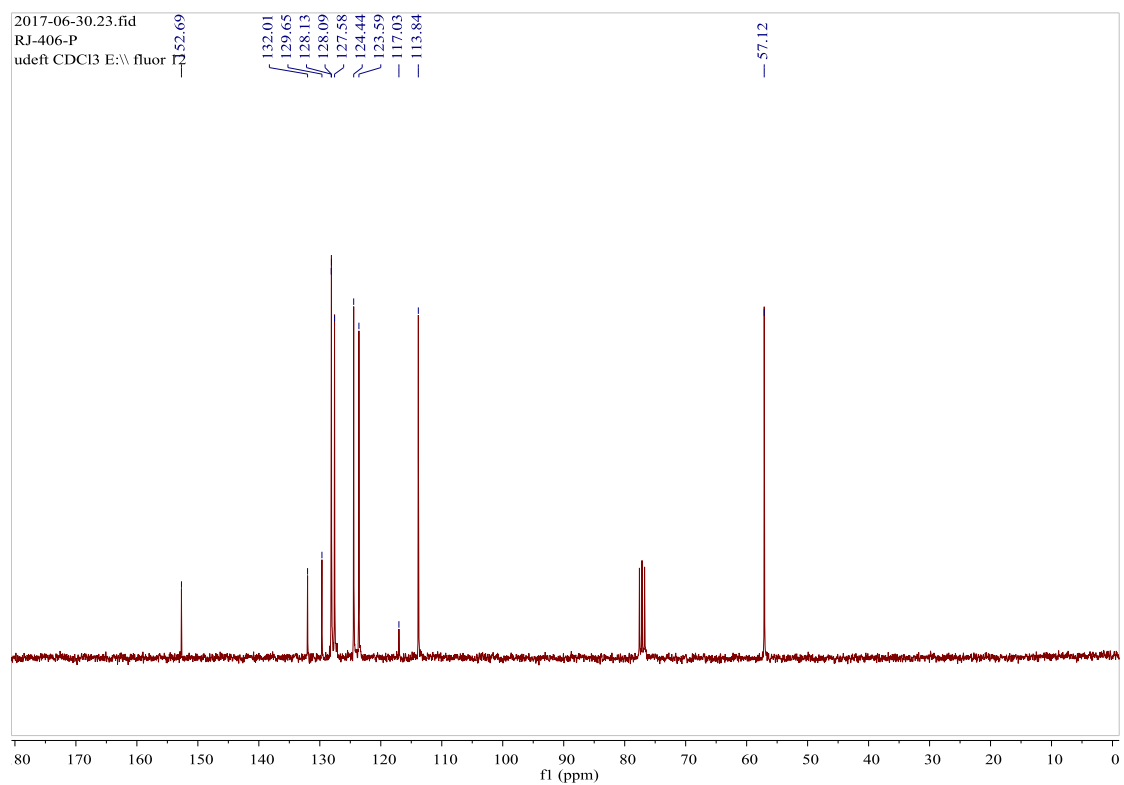

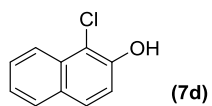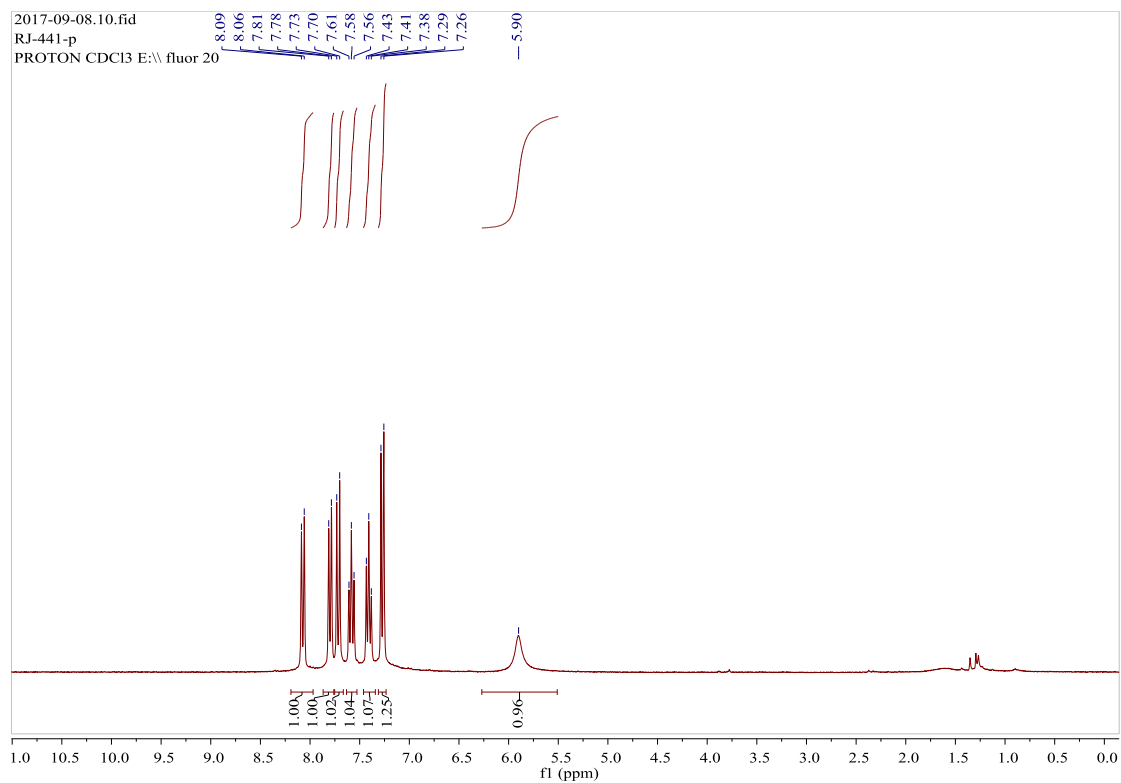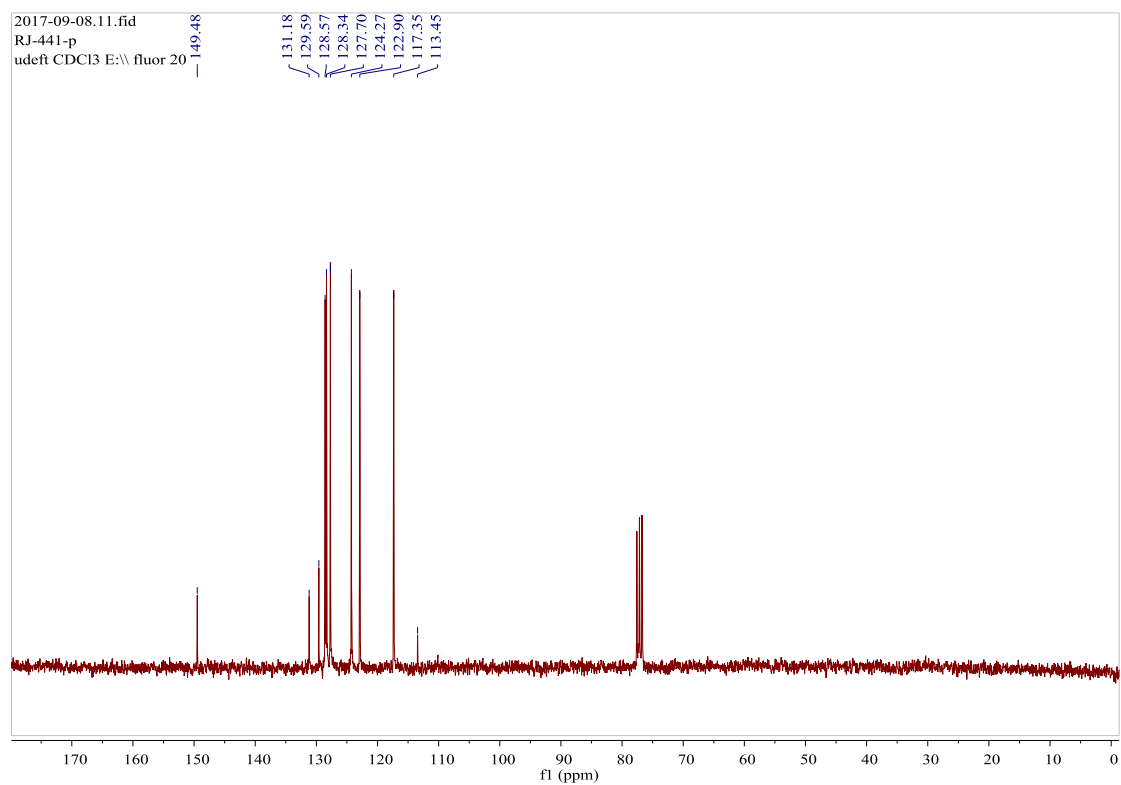

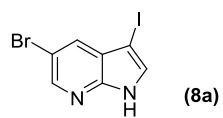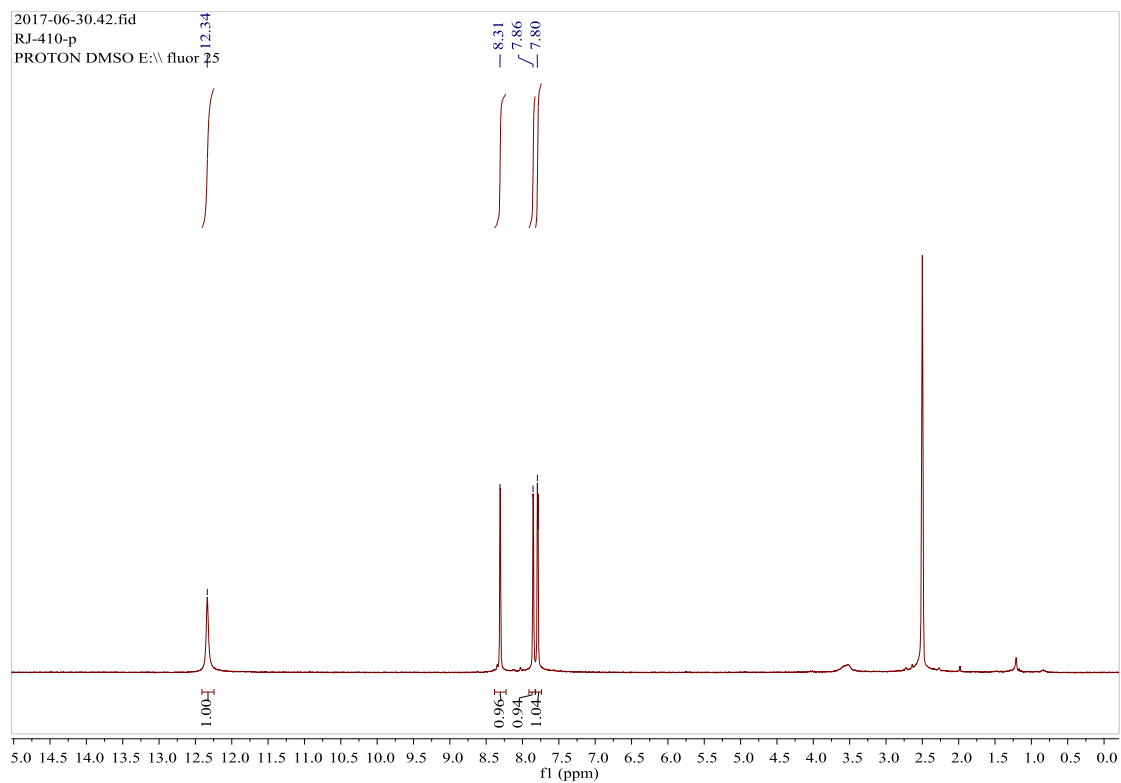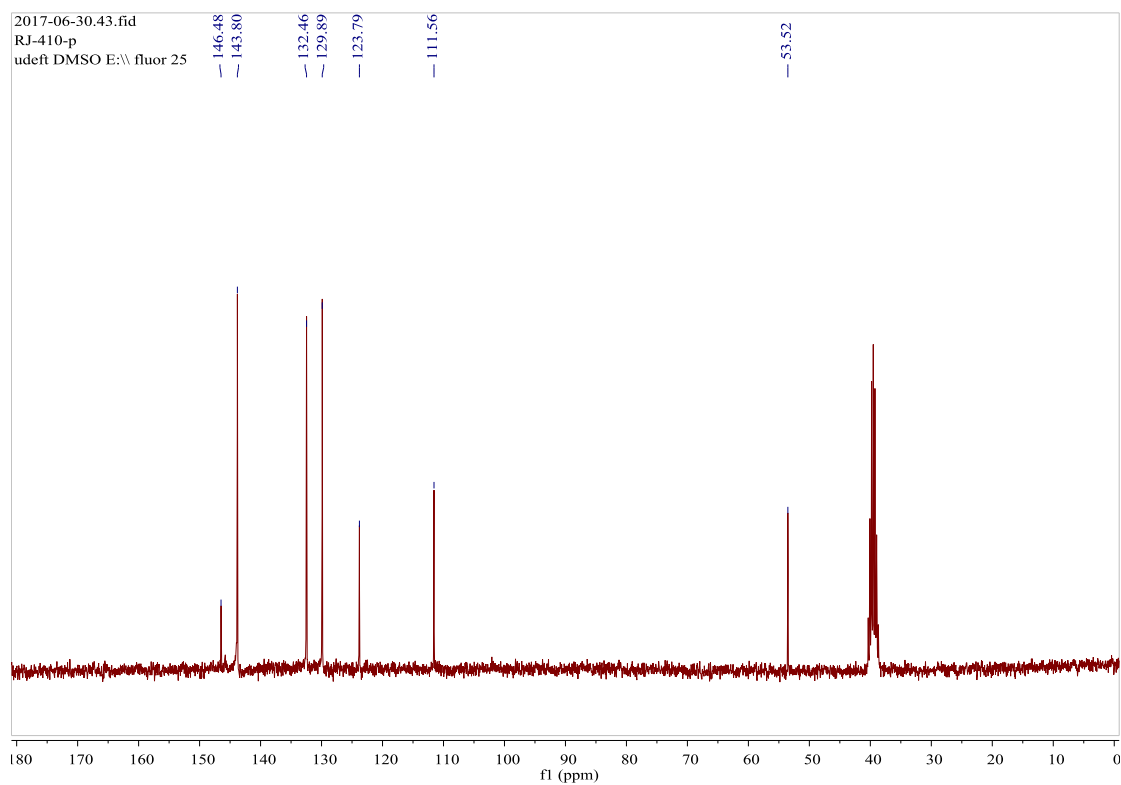

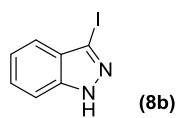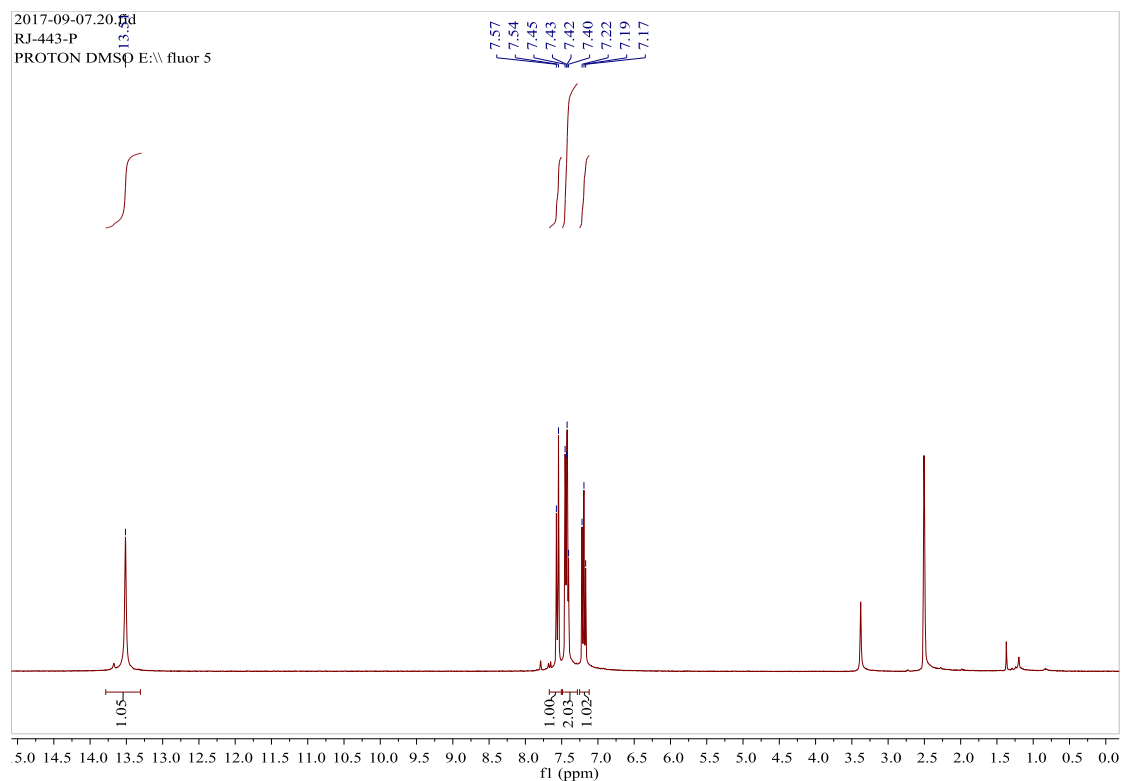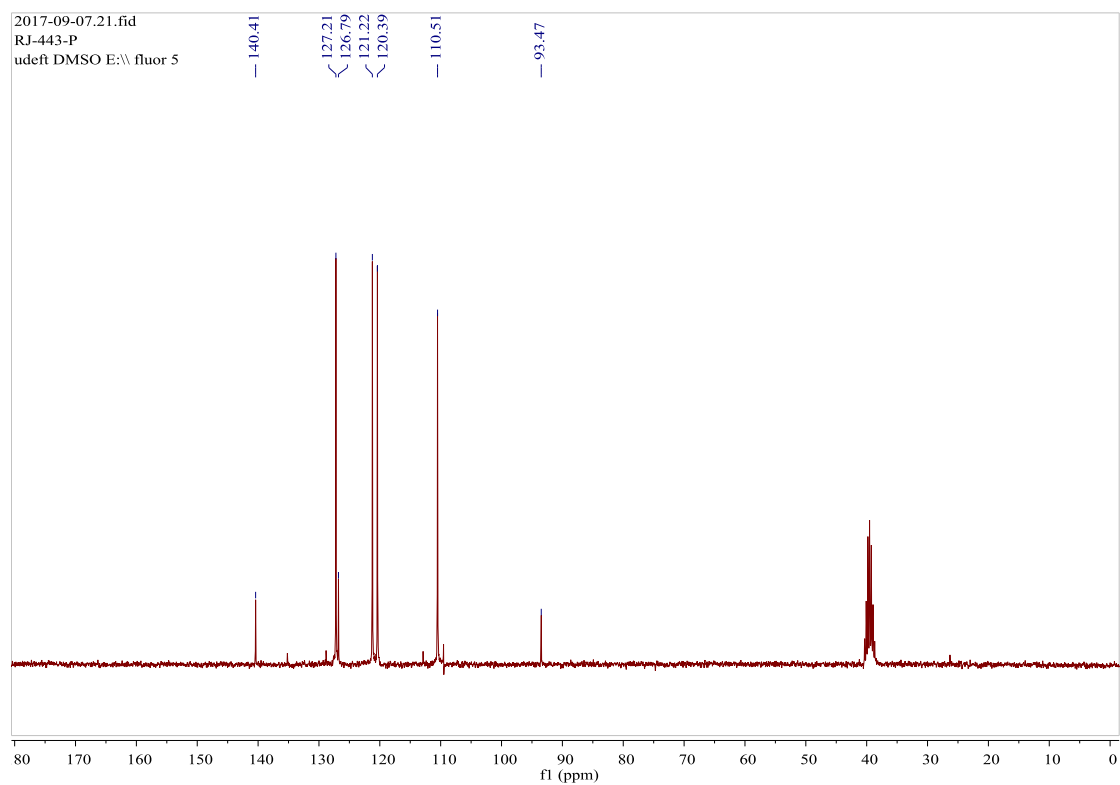

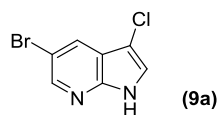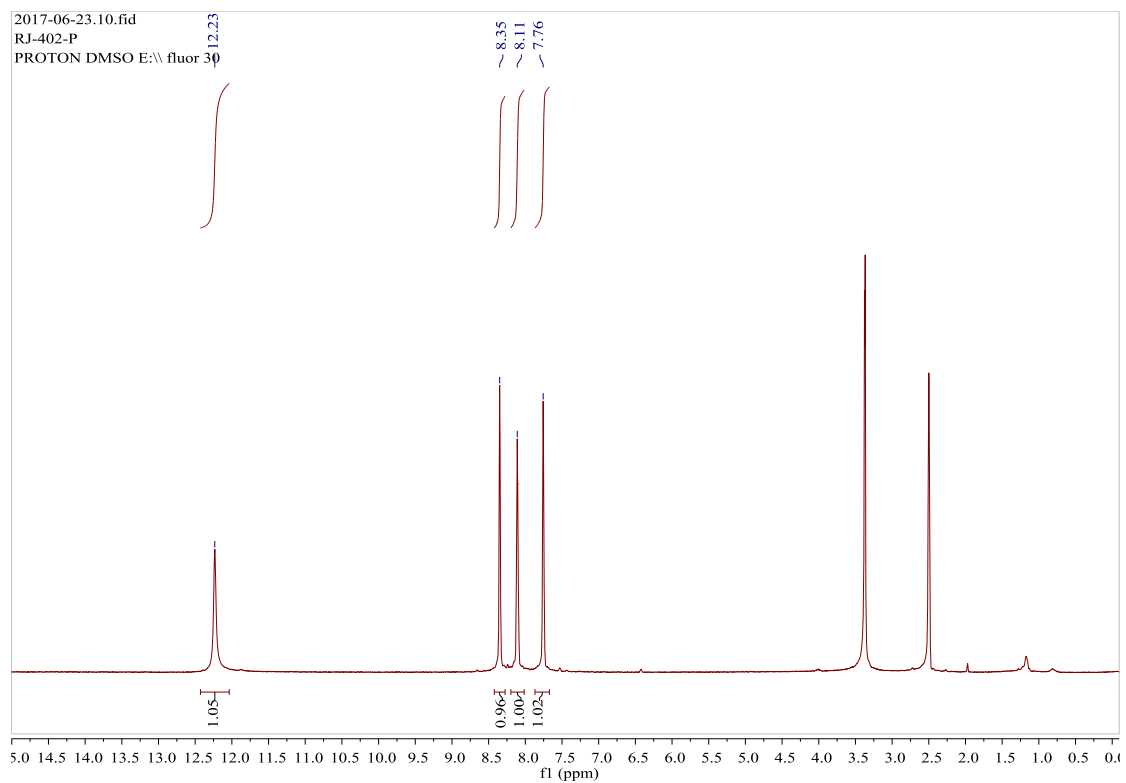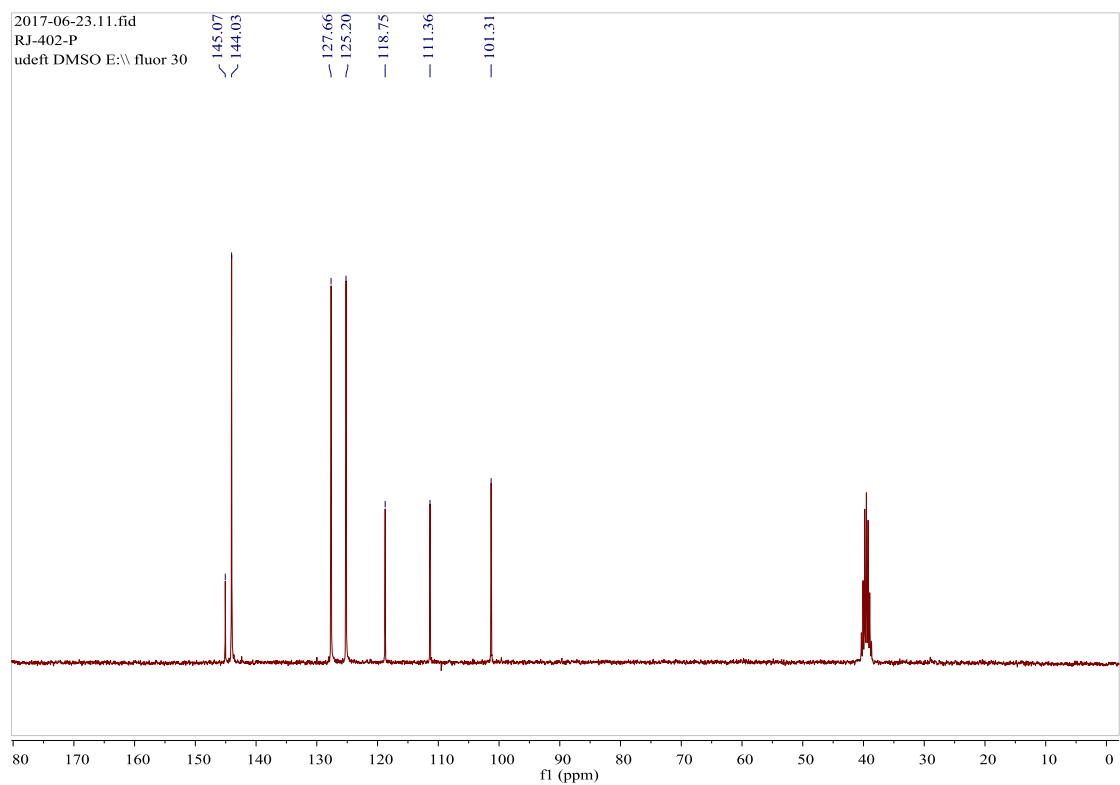

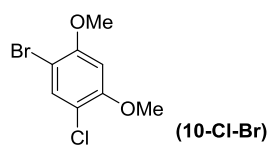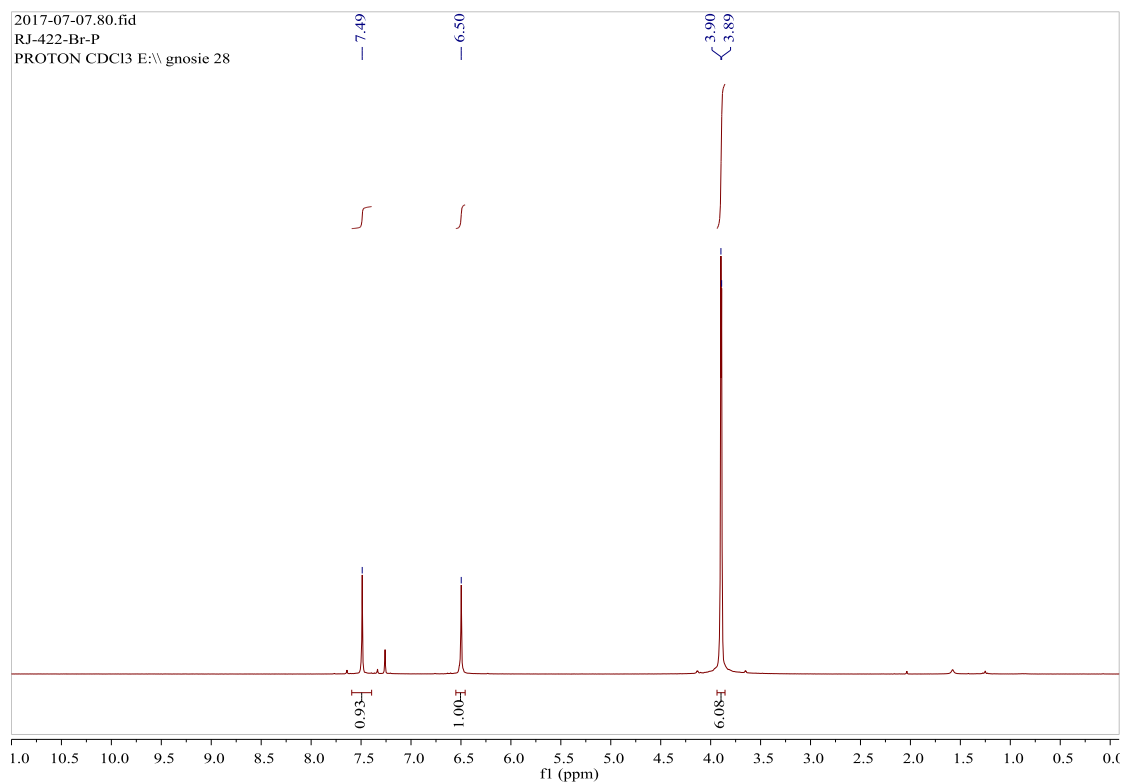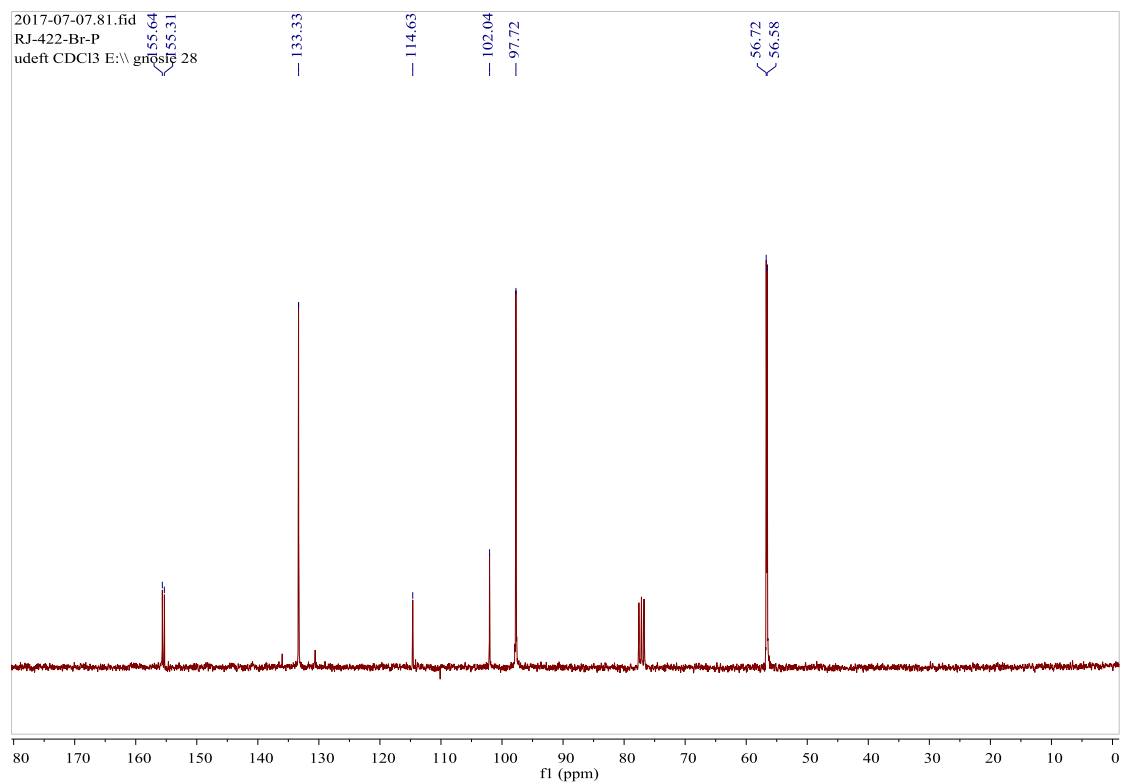

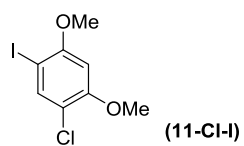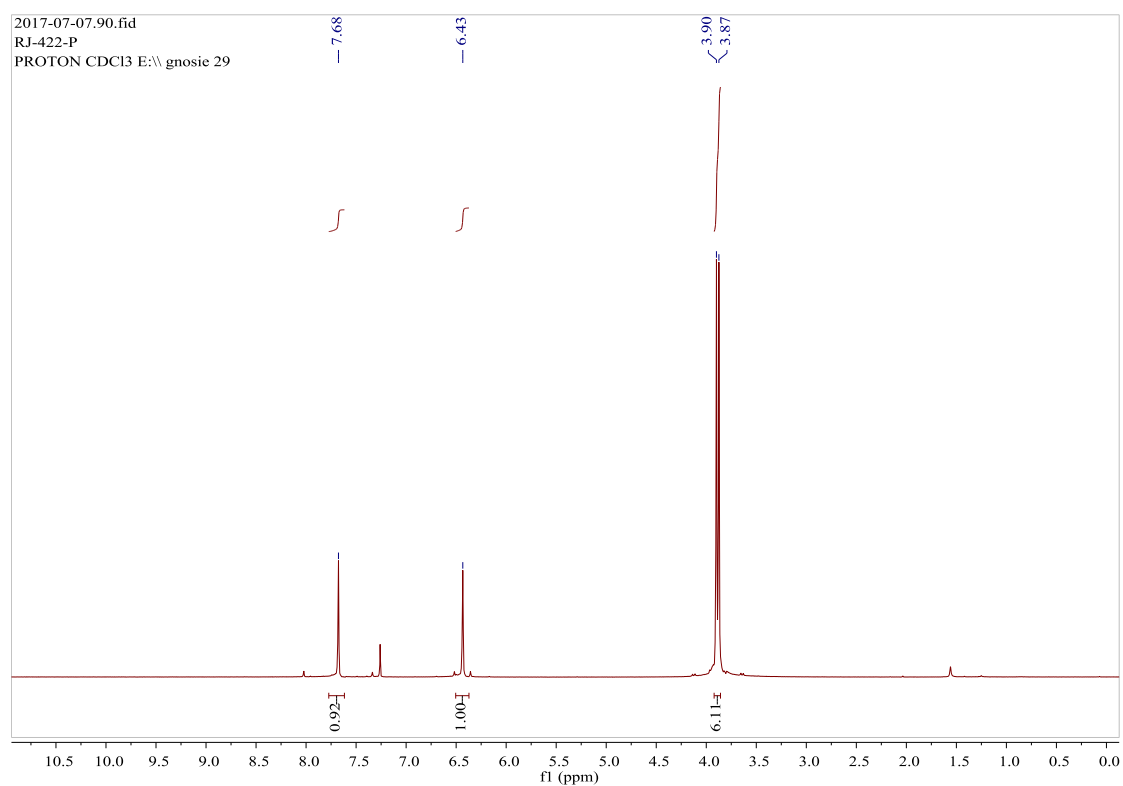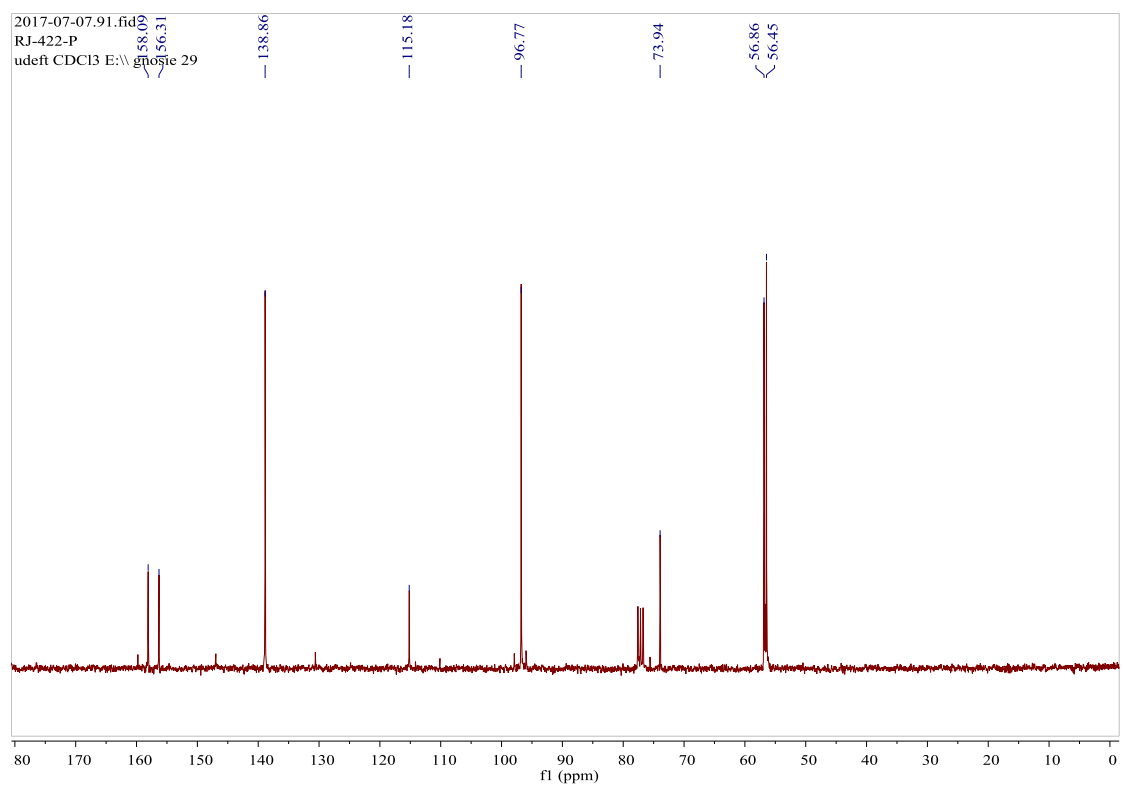

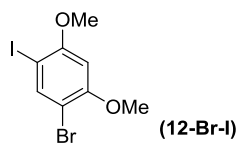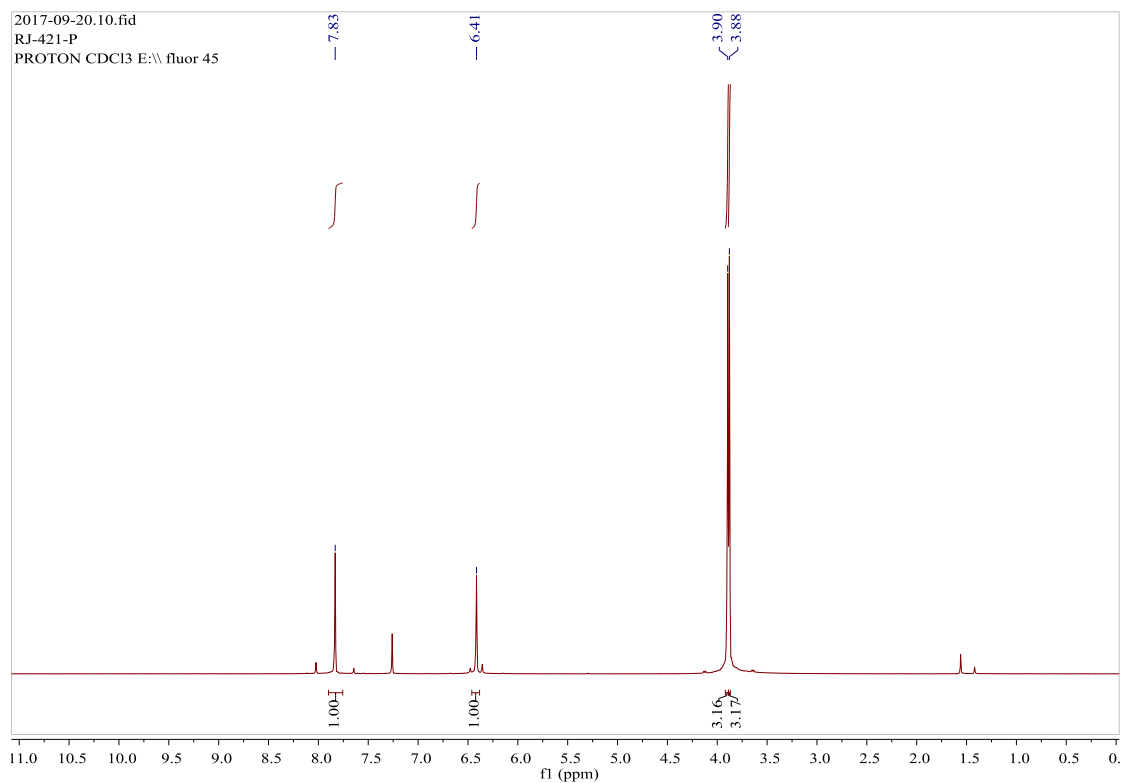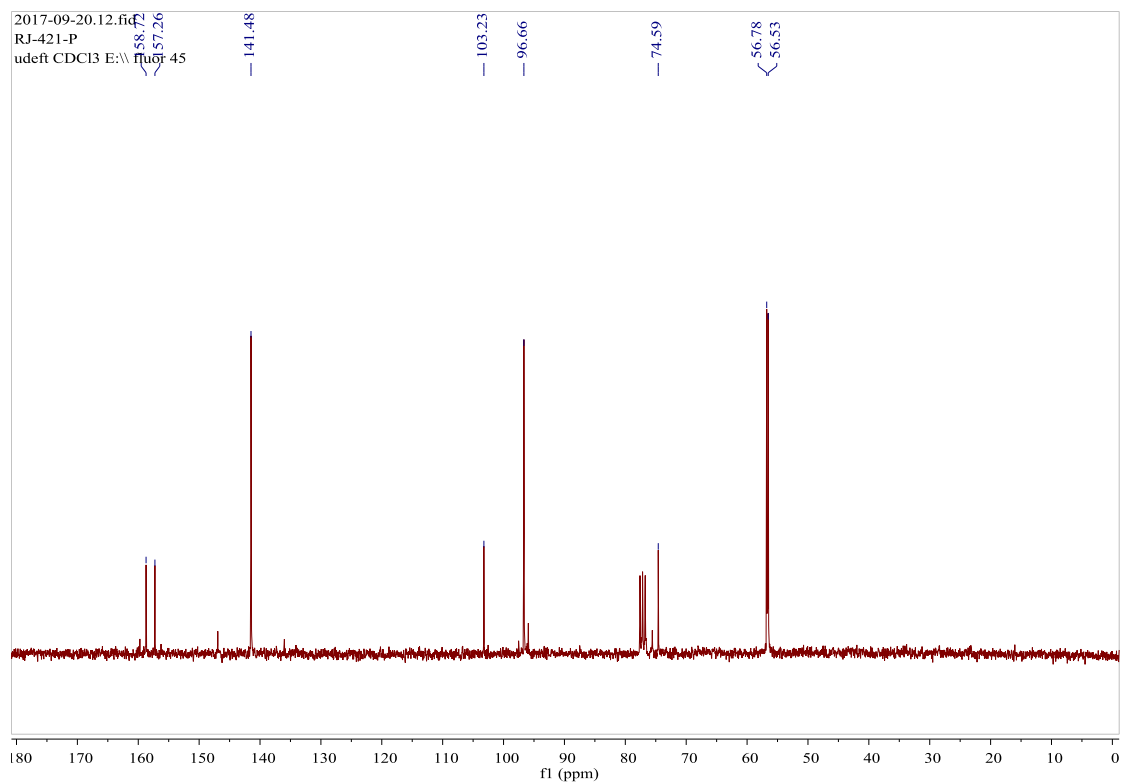

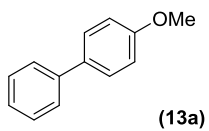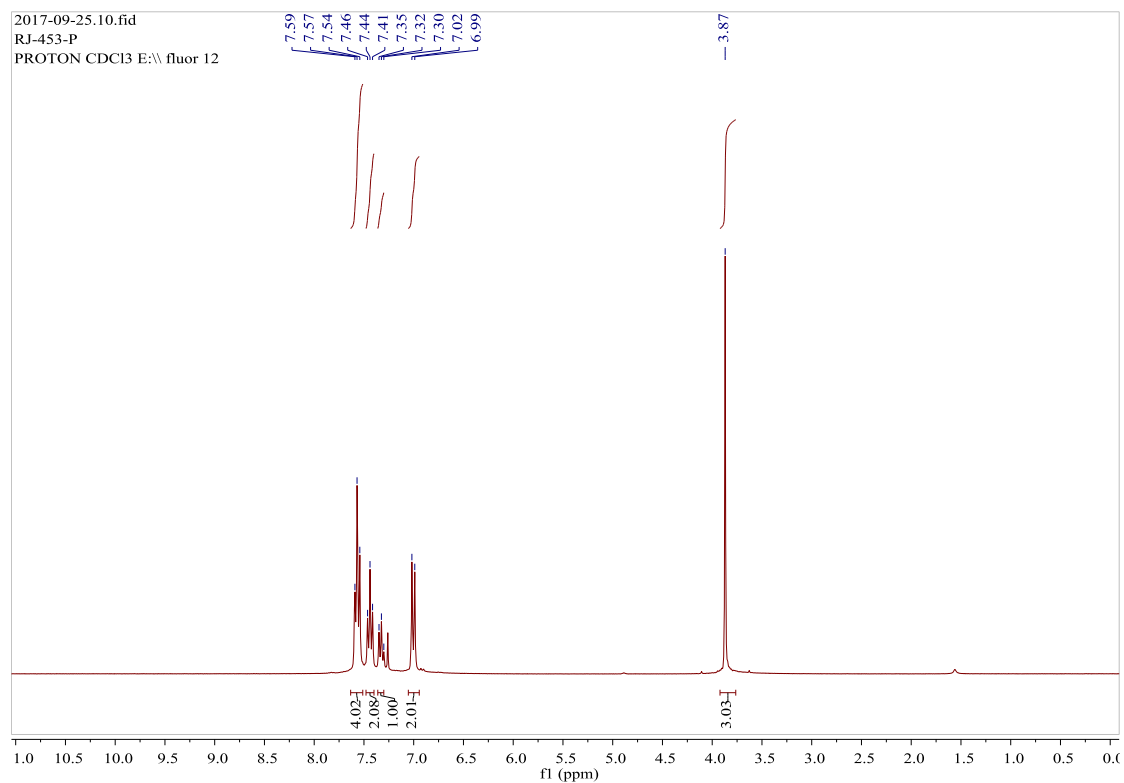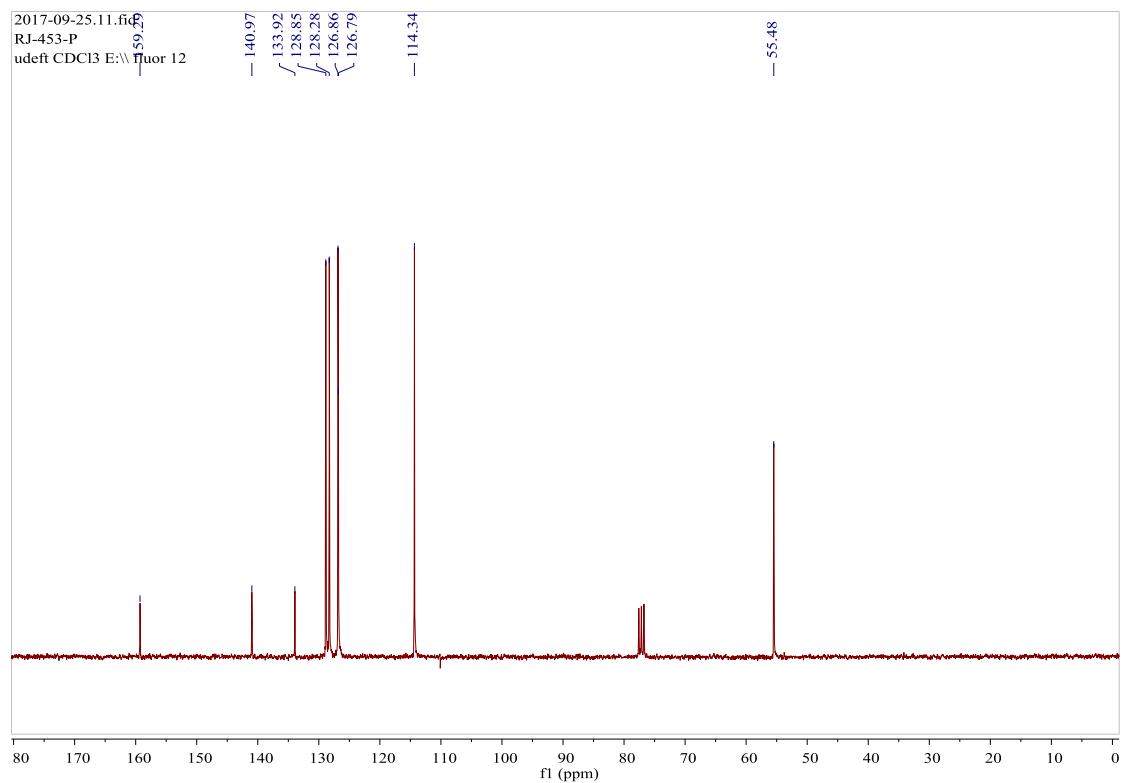

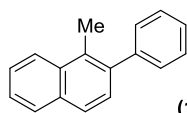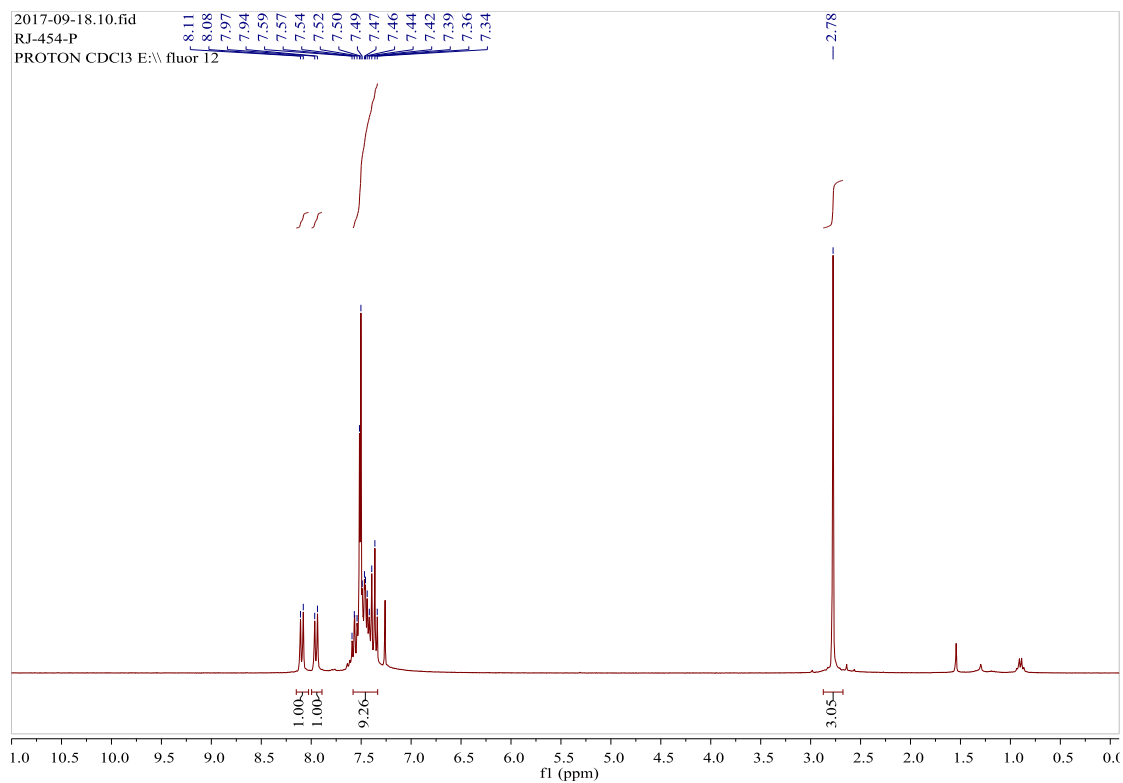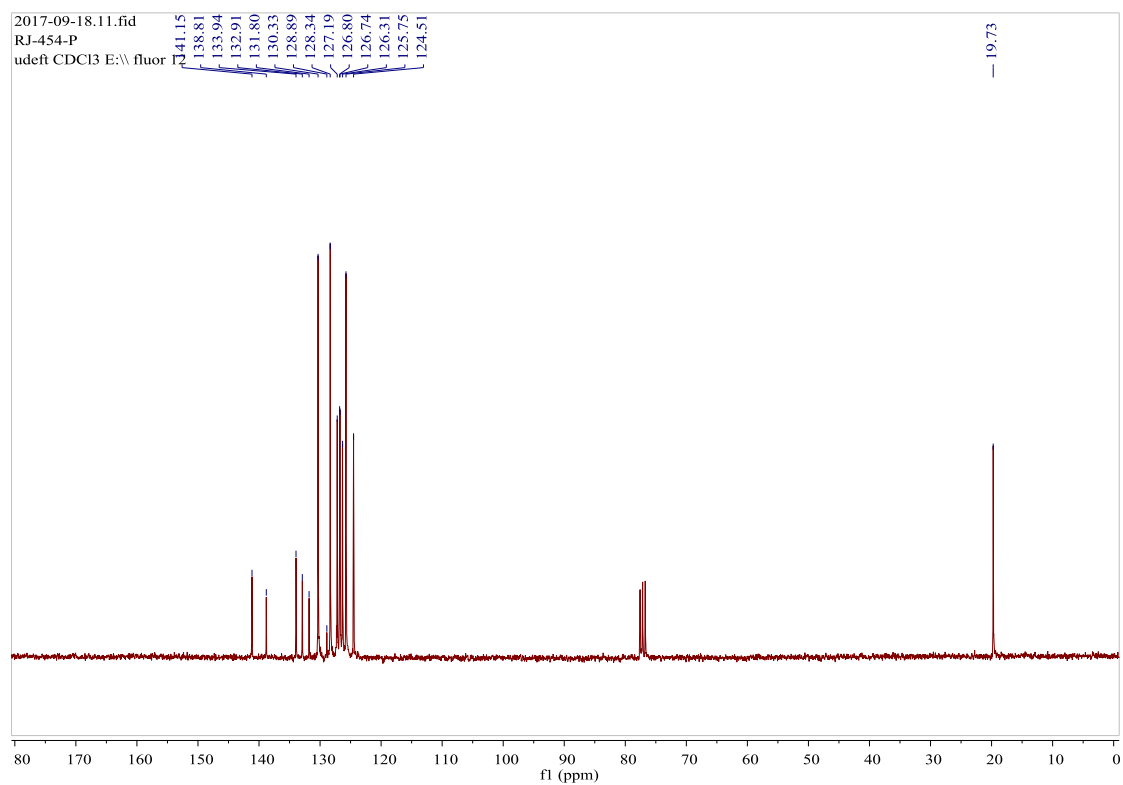

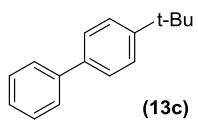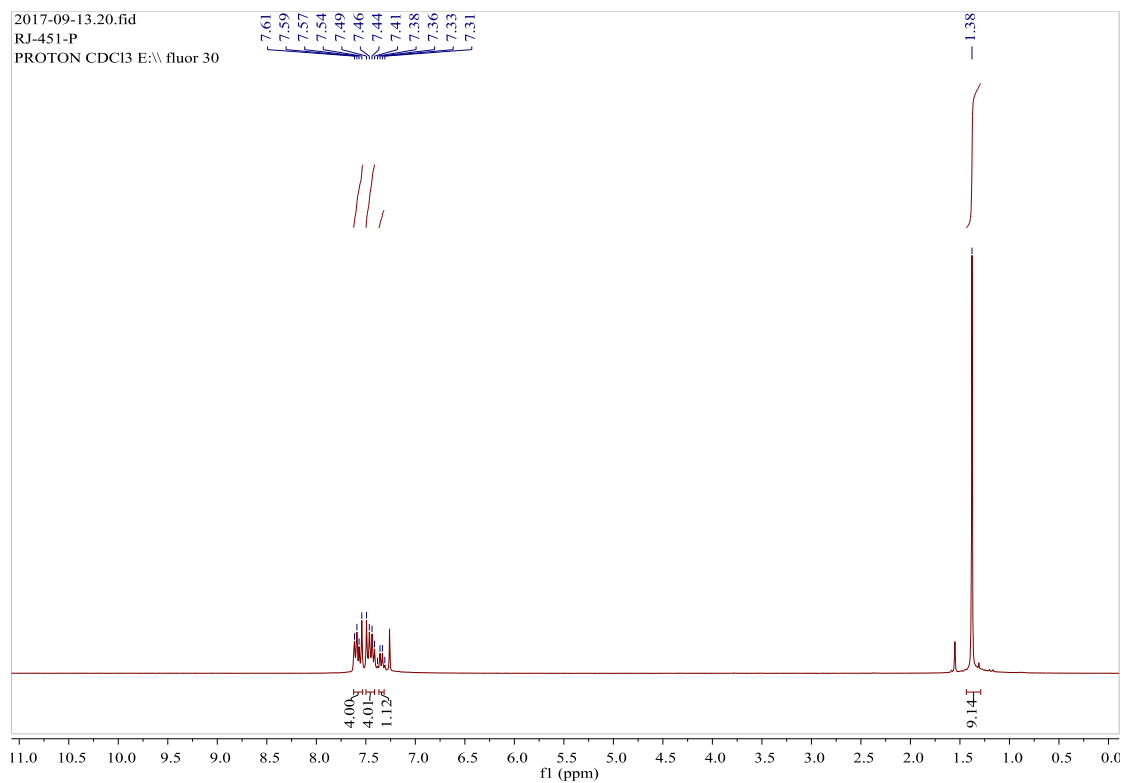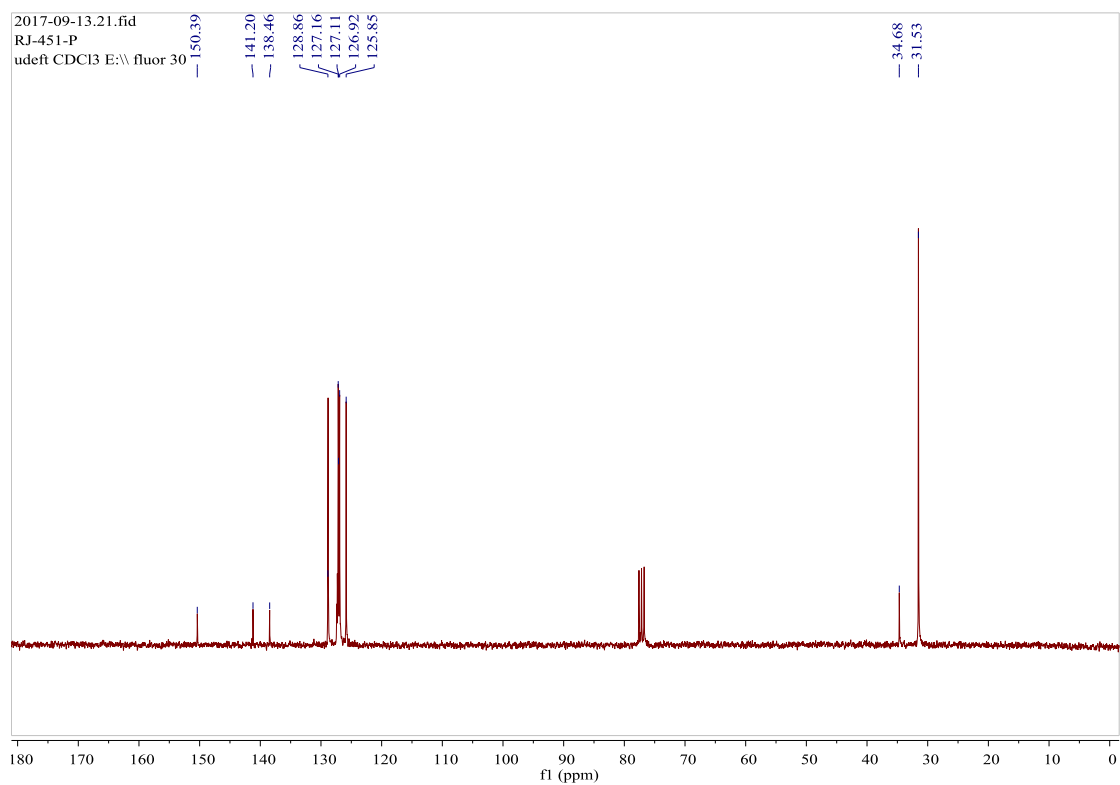

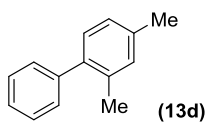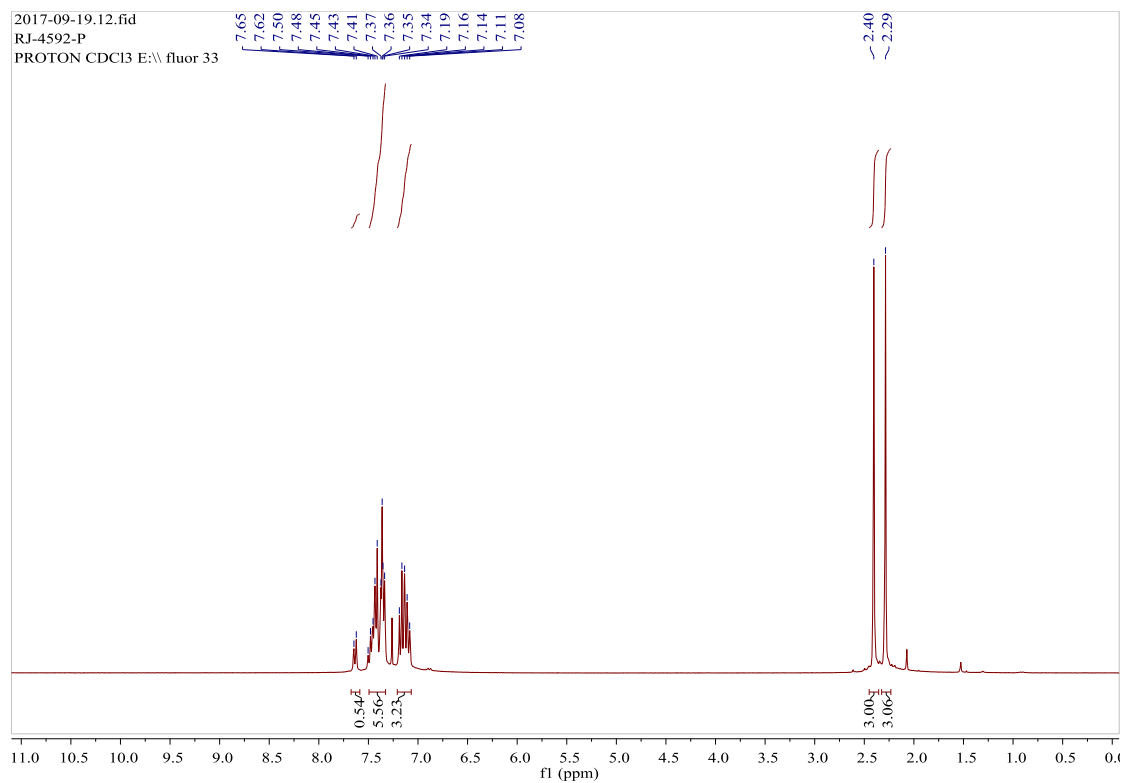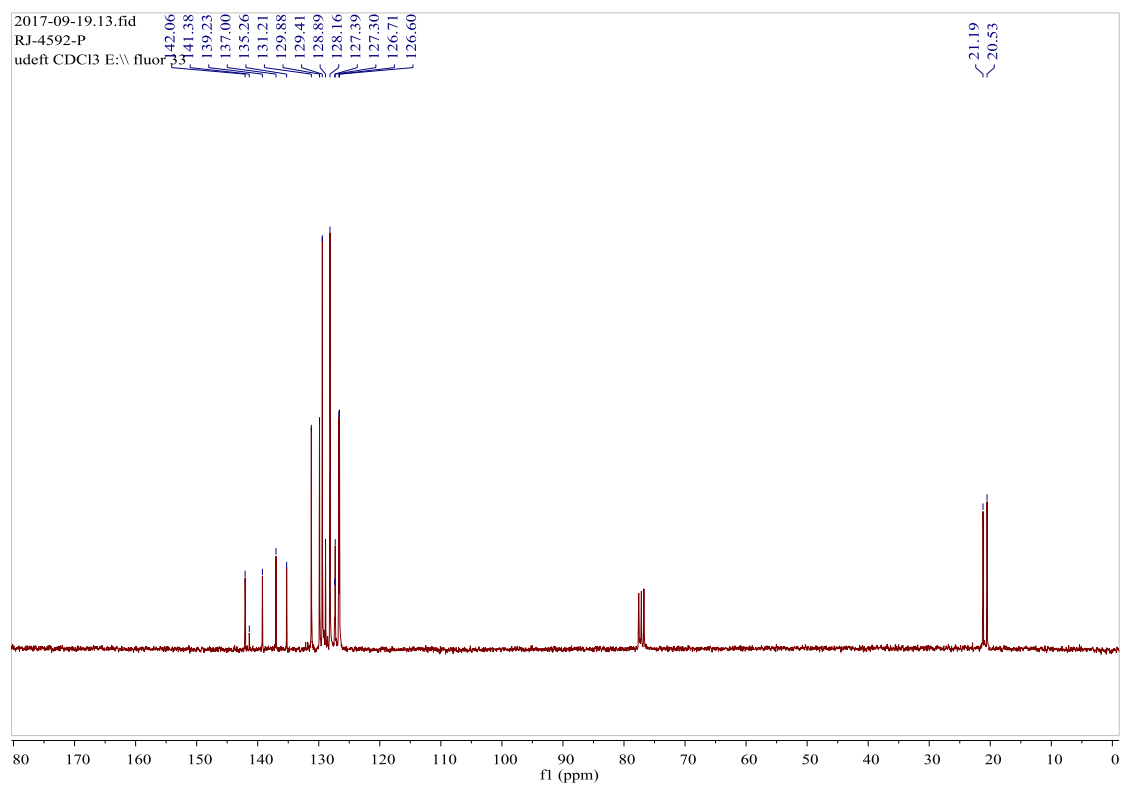

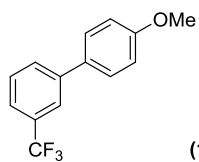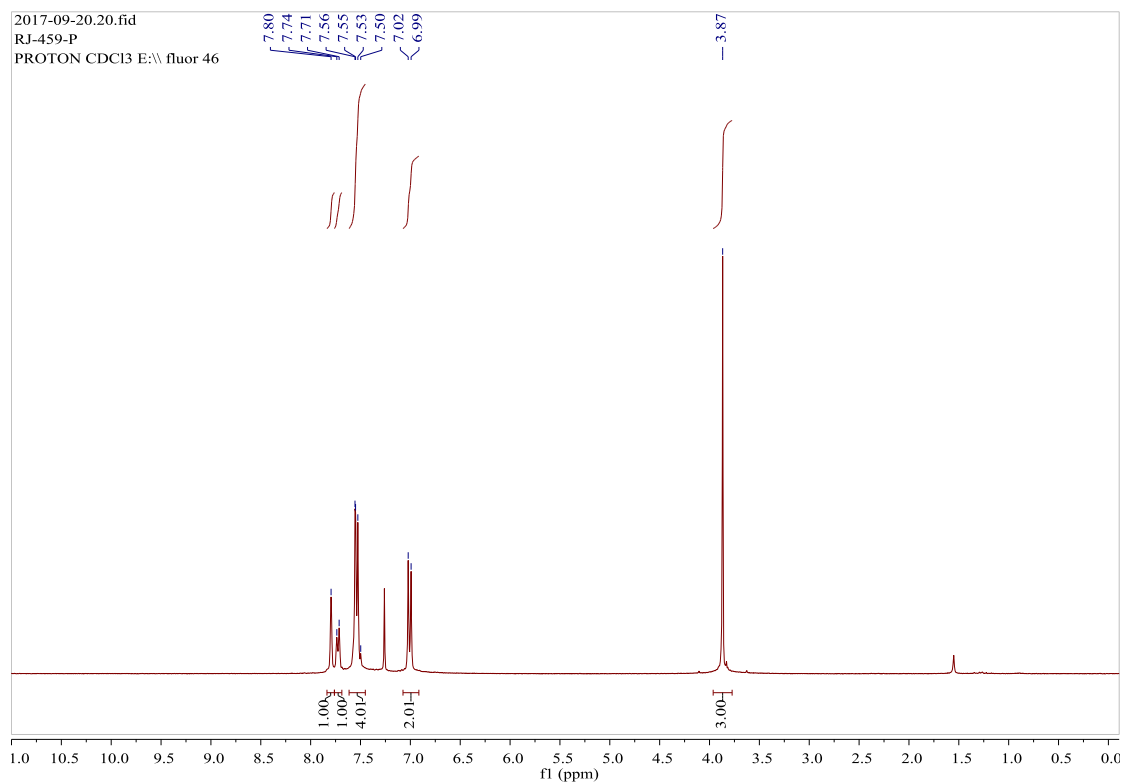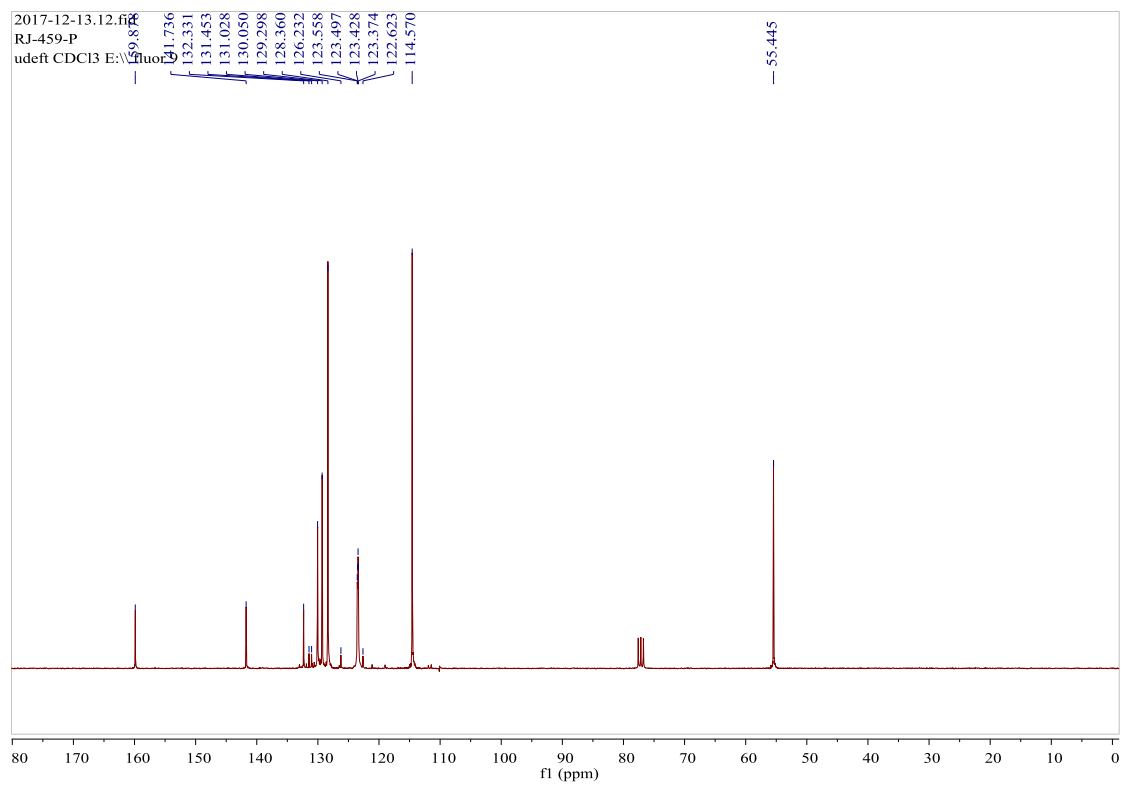

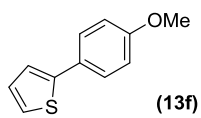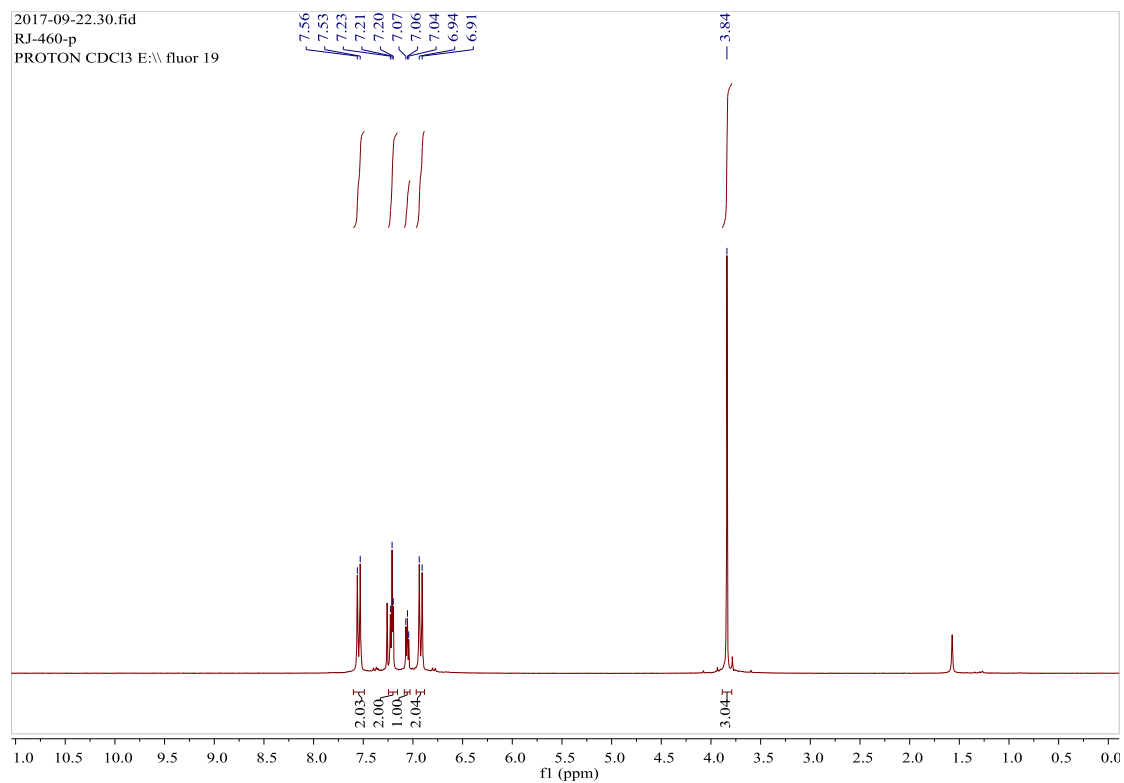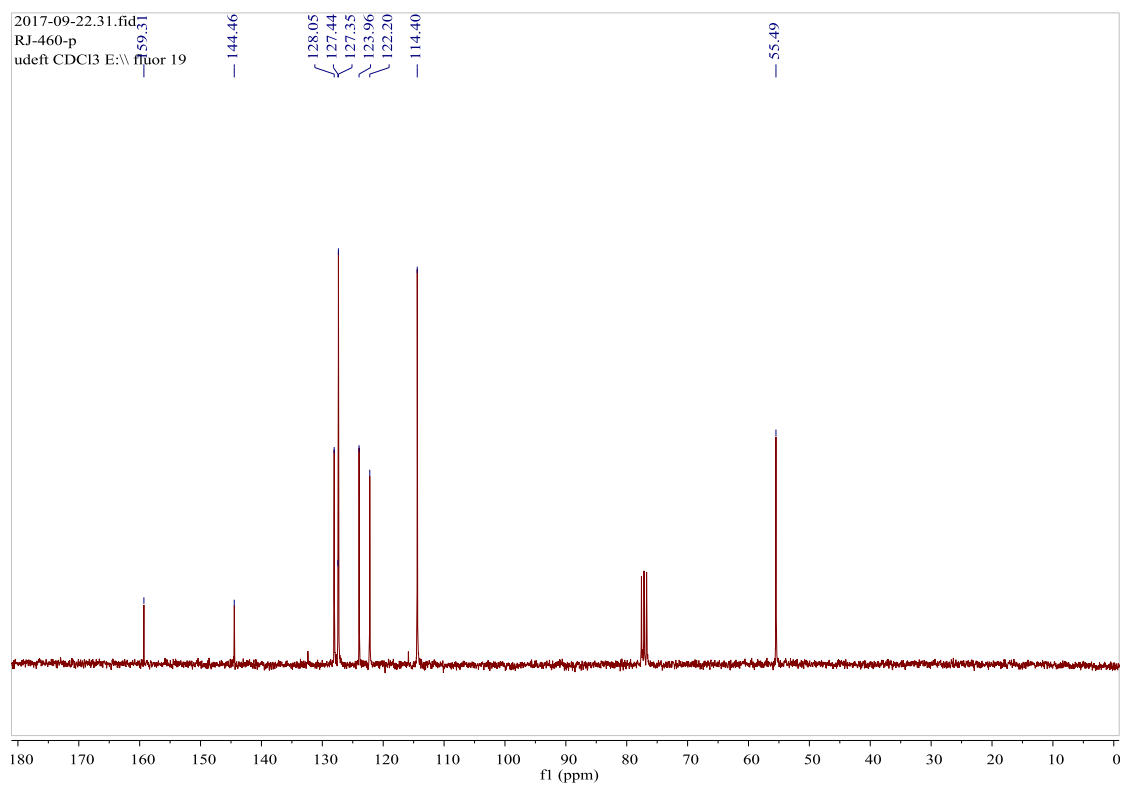

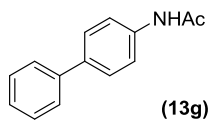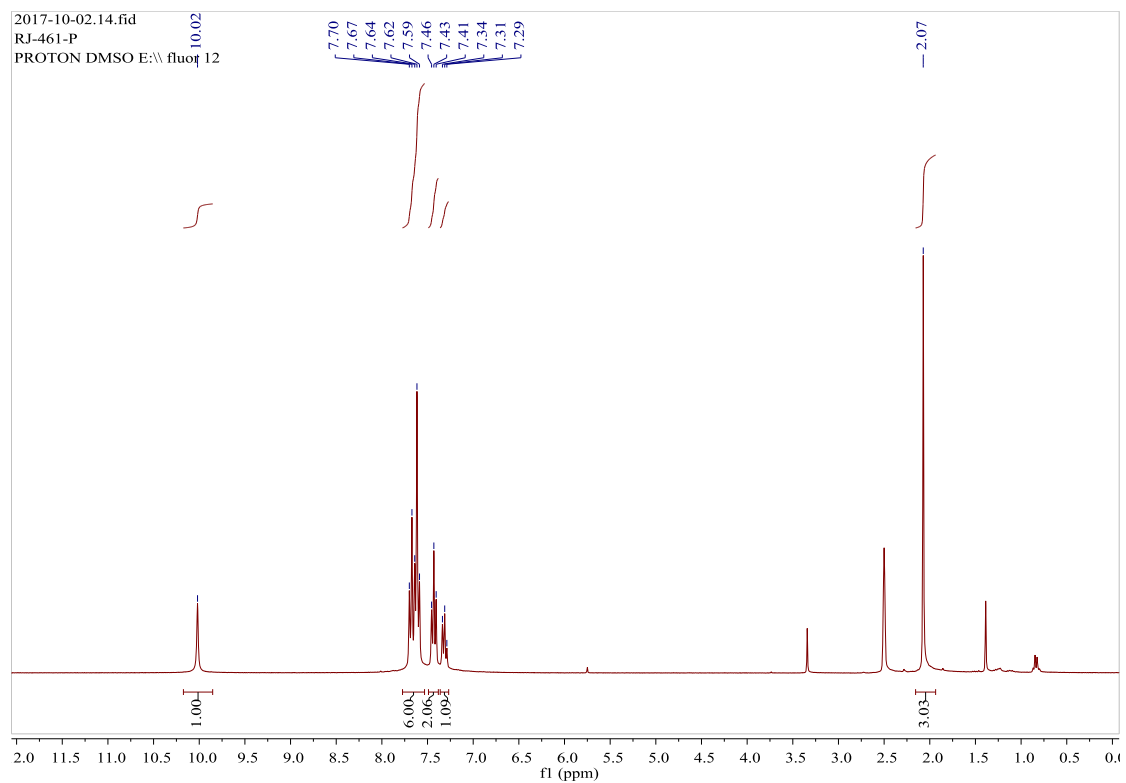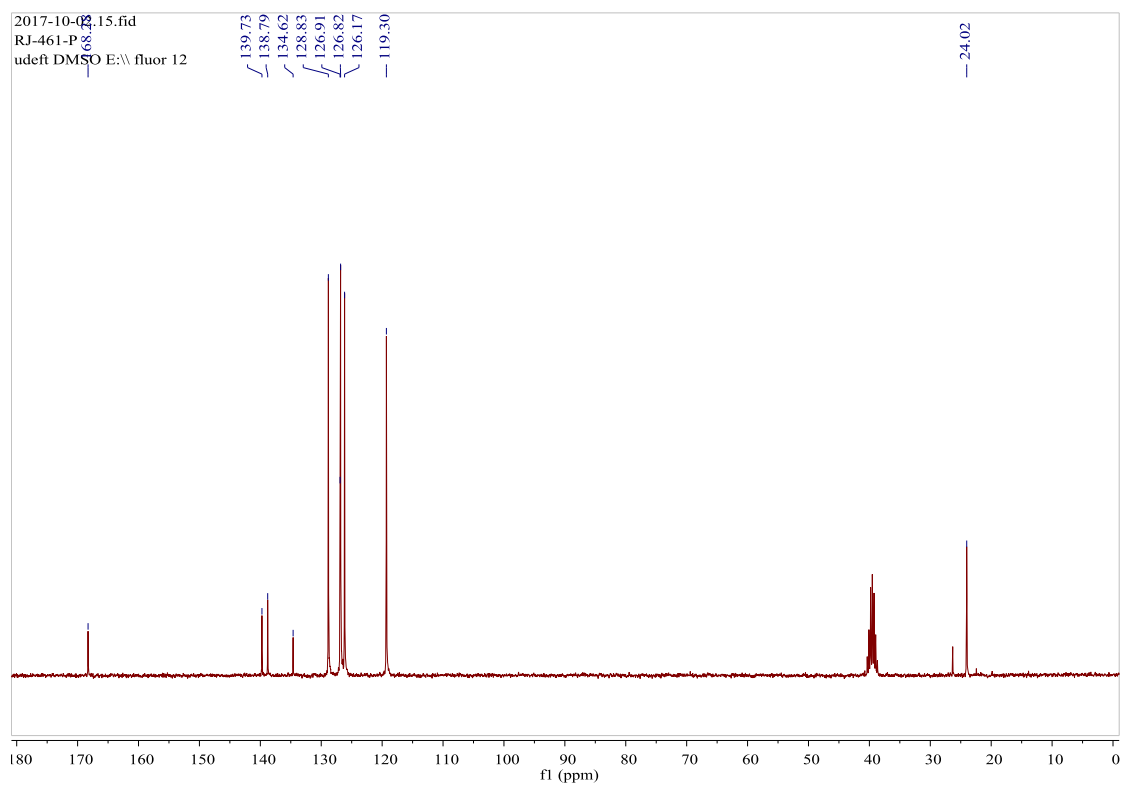

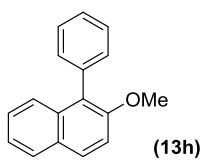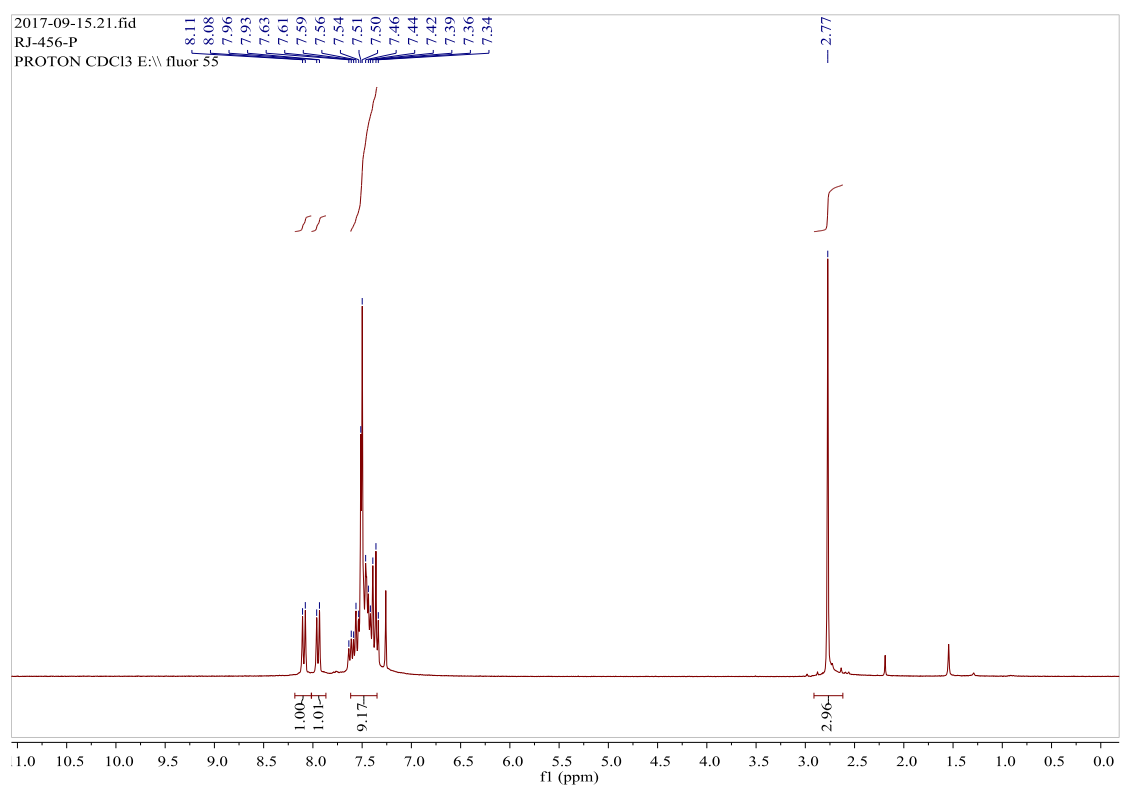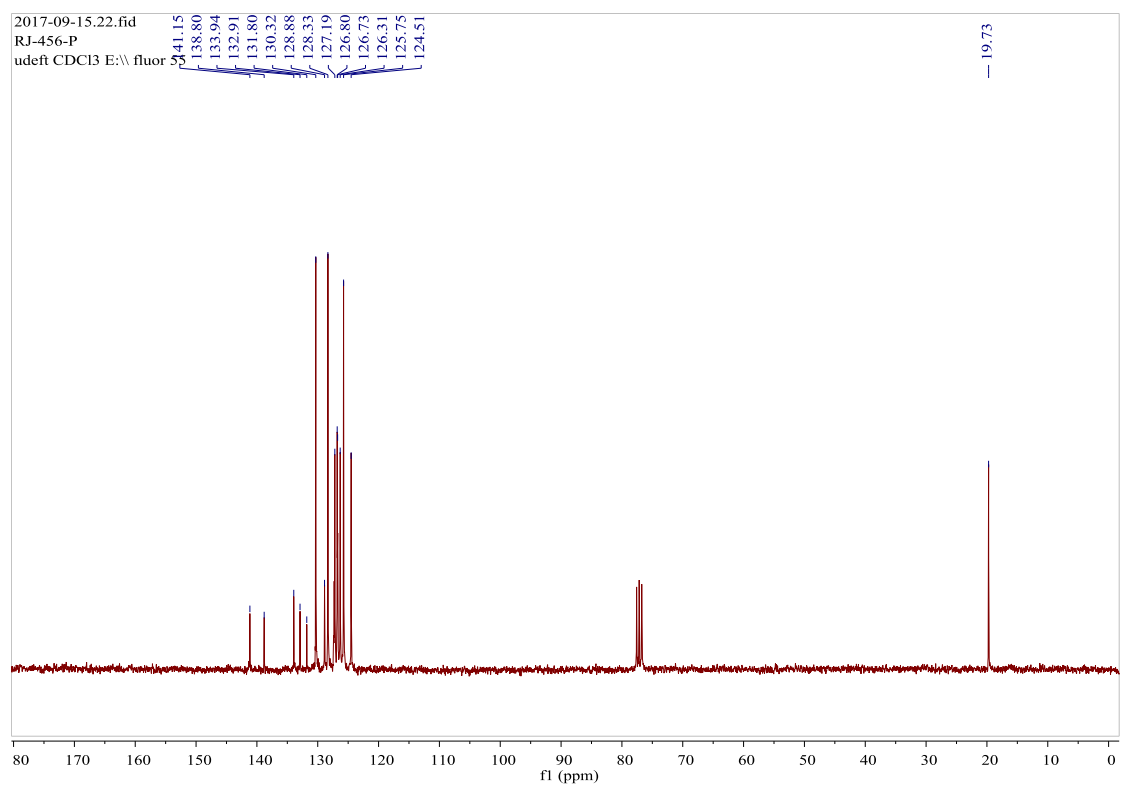



**1,4-dibromo-2,5-dimethylbenzene and 2-bromo-1,4-dimethylbenzene (5.9:1)**

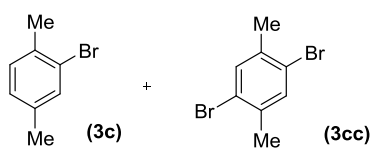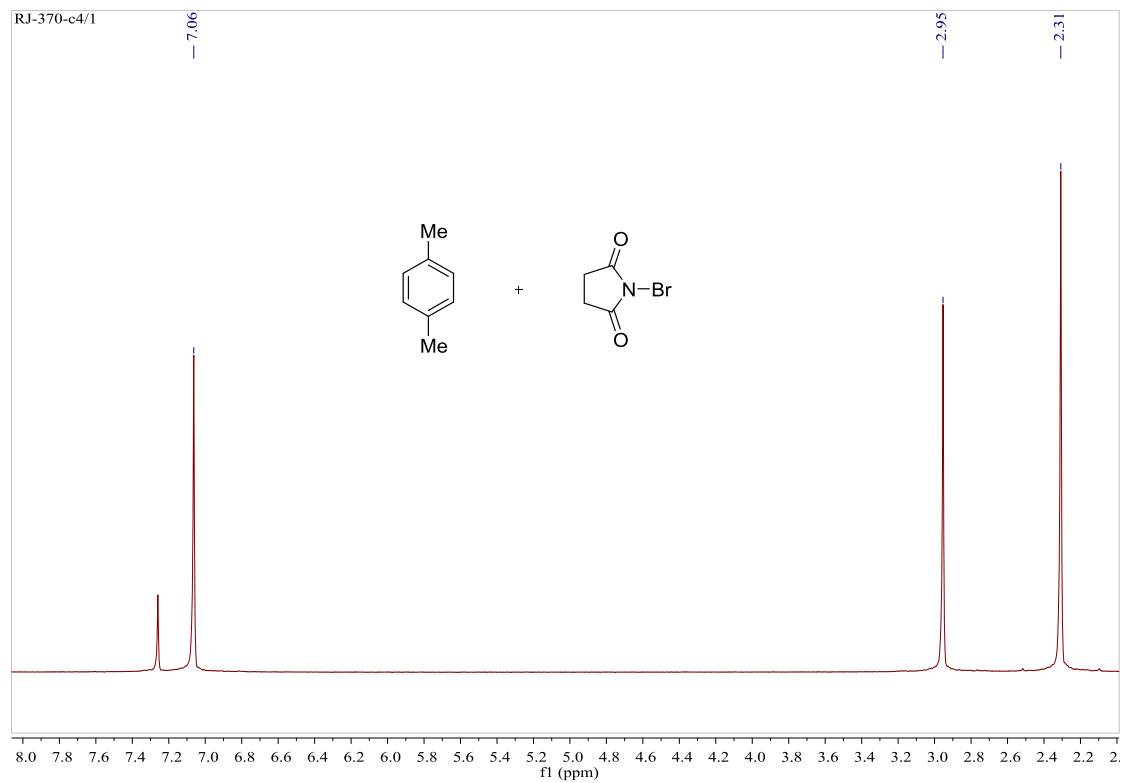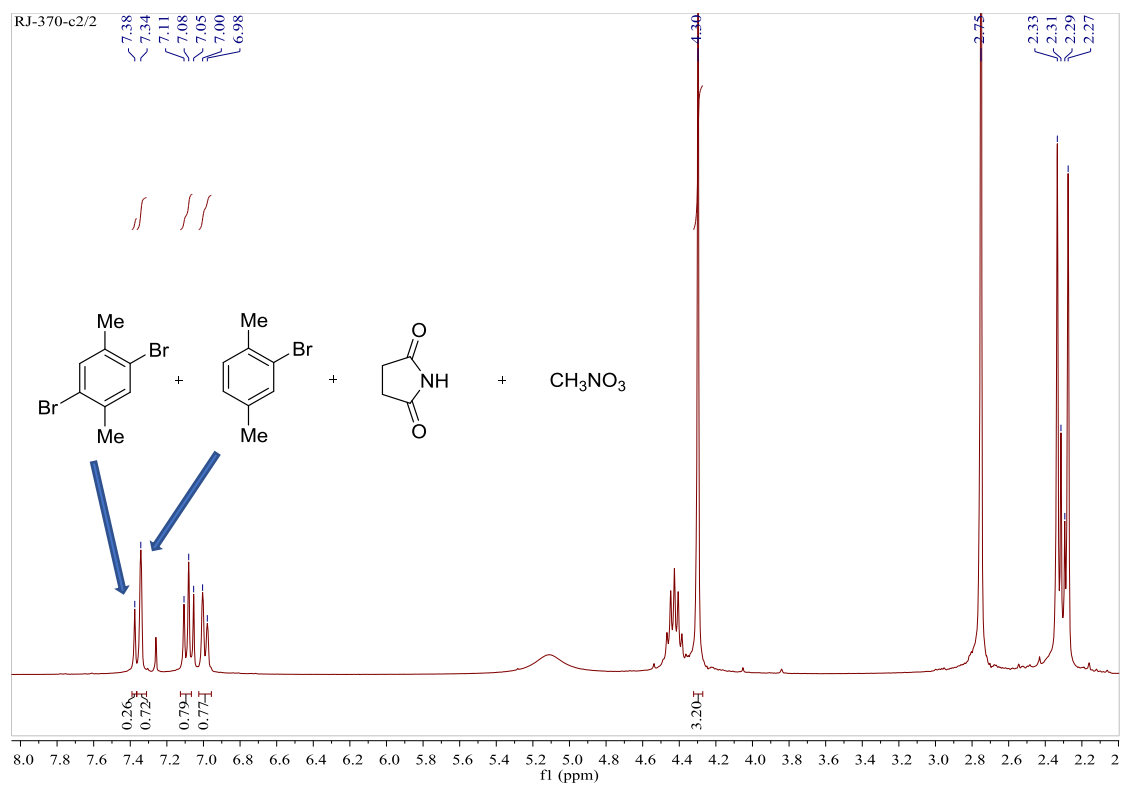

# 1-bromo-2,4-dimethylbenzene

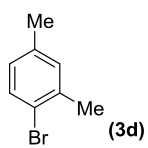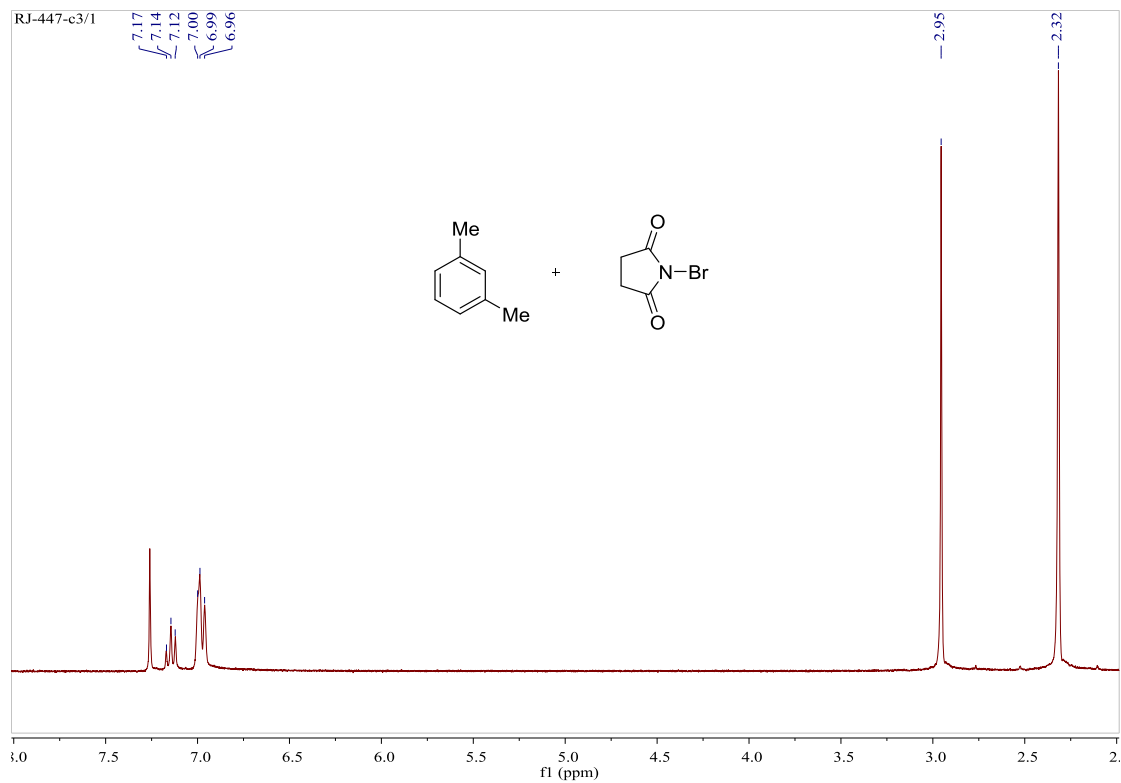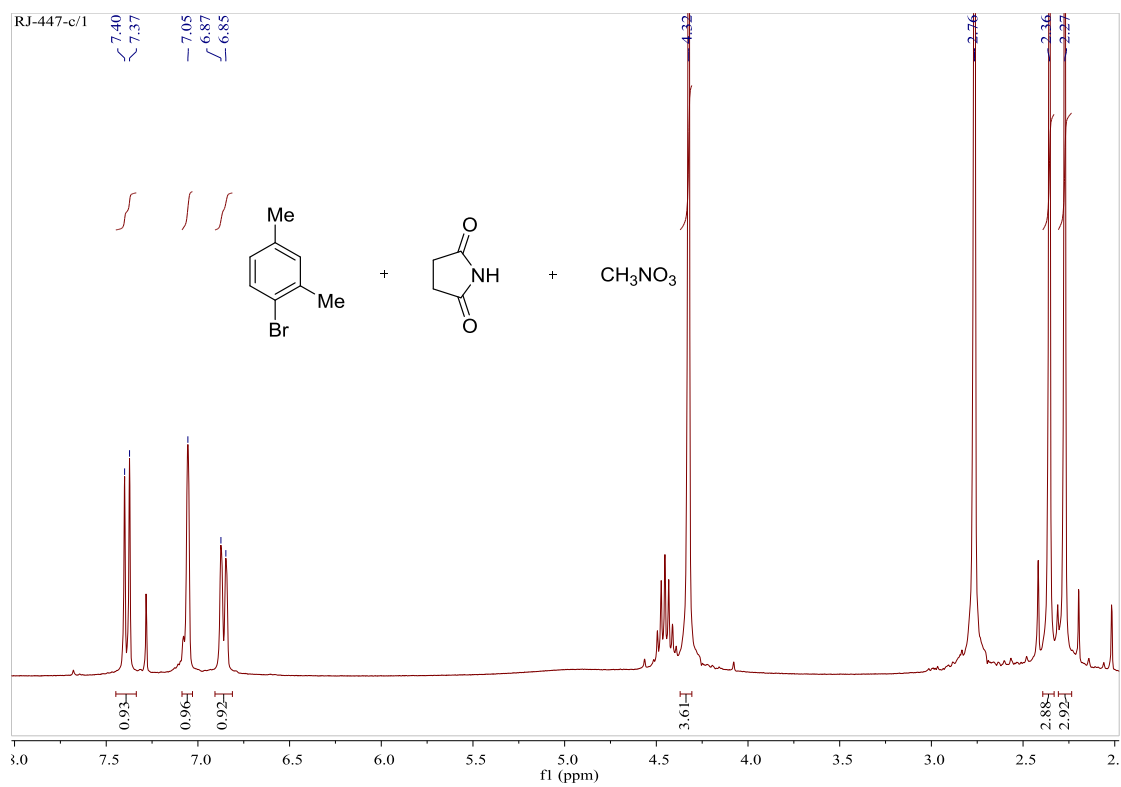

**1-bromo-2,3-dimethylbenzene and 4-bromo-1,2-dimethylbenzene (4.8:1)**

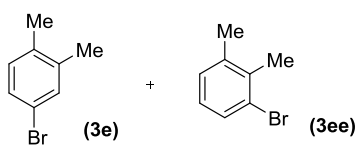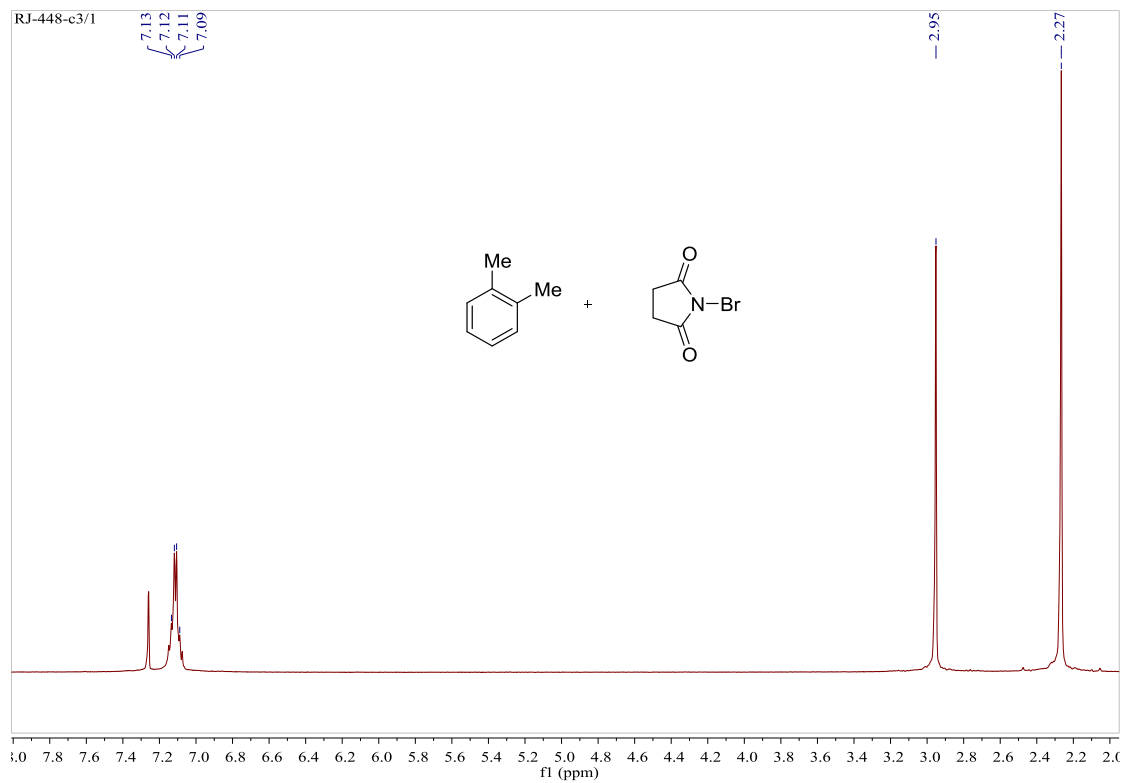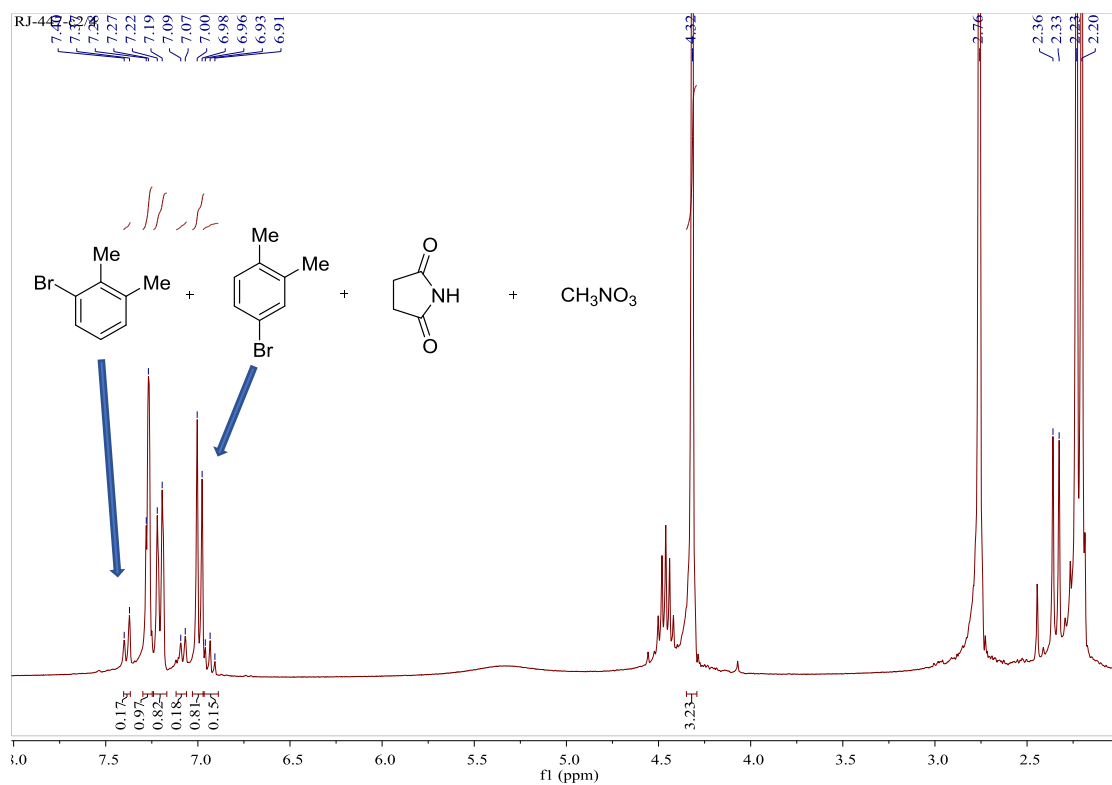

**1-bromonaphthalene compound with 2-bromonaphthalene (24:1)**

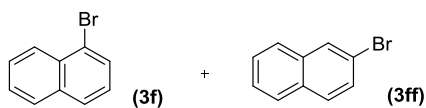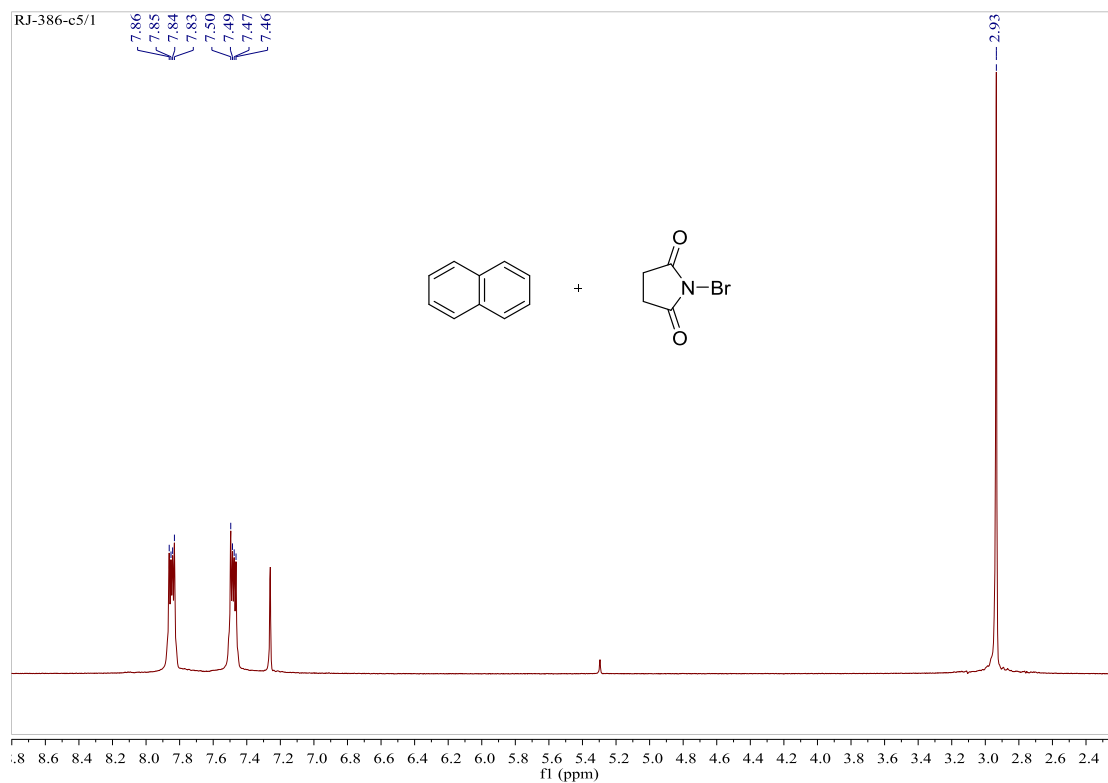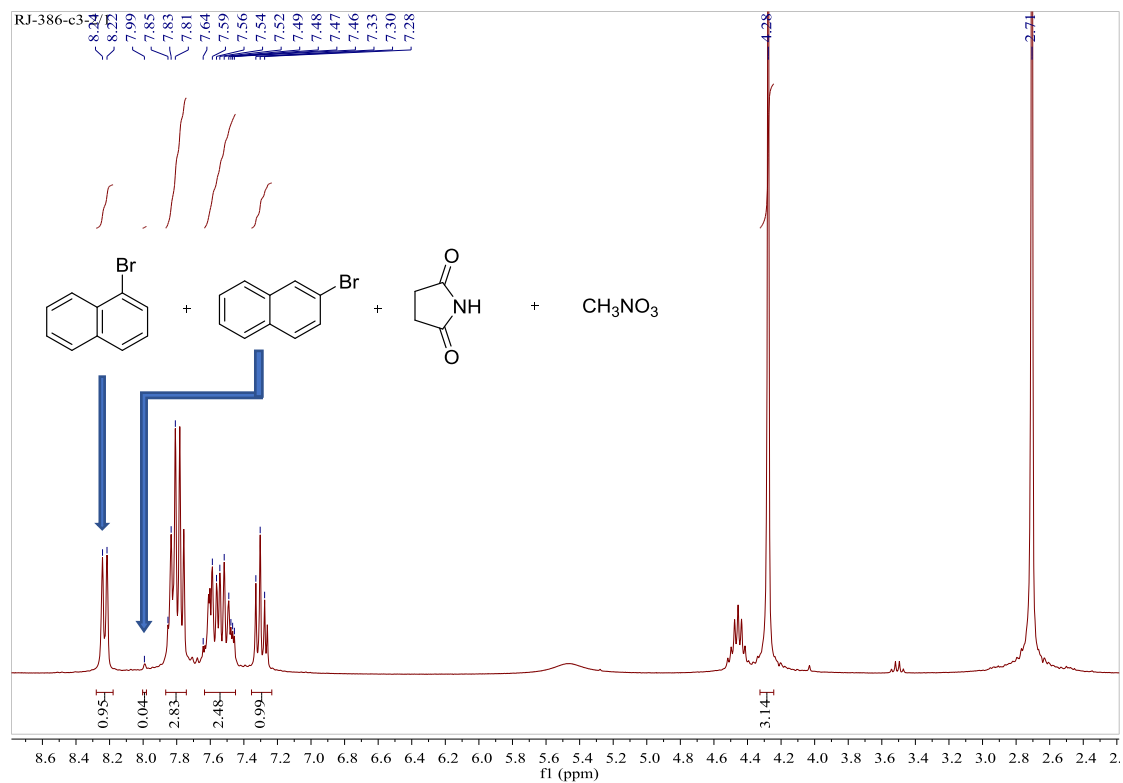

# 1-bromo-4-(tert-butyl)benzene

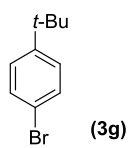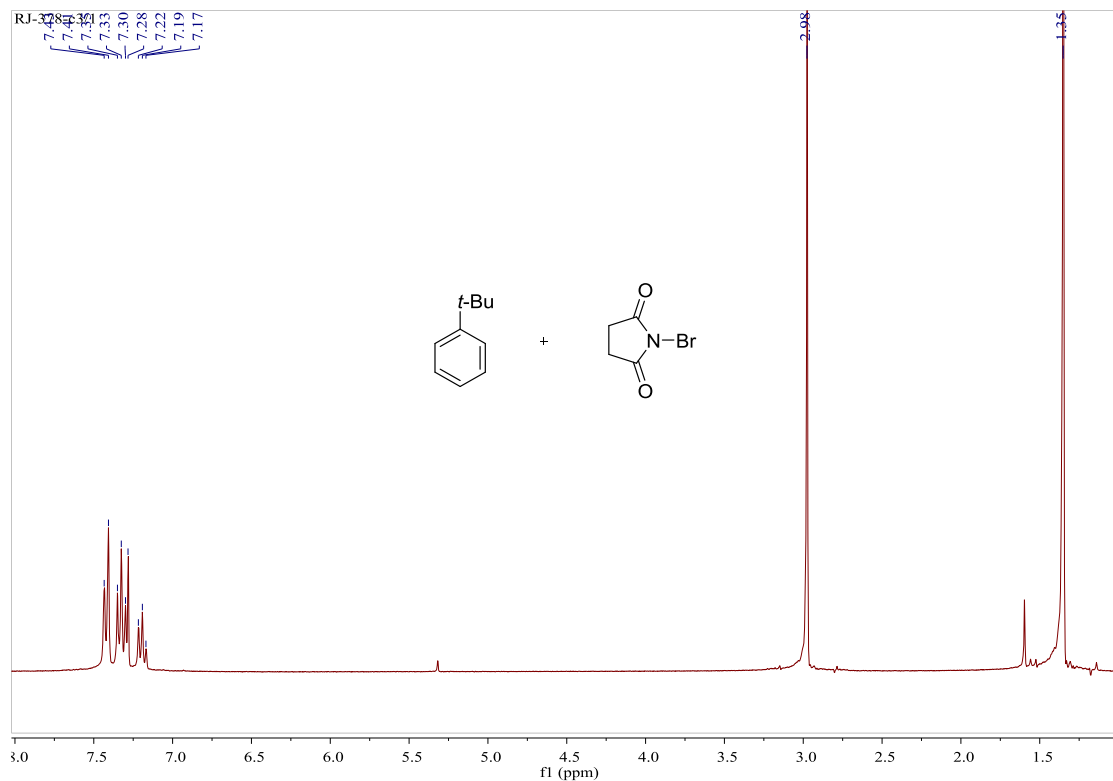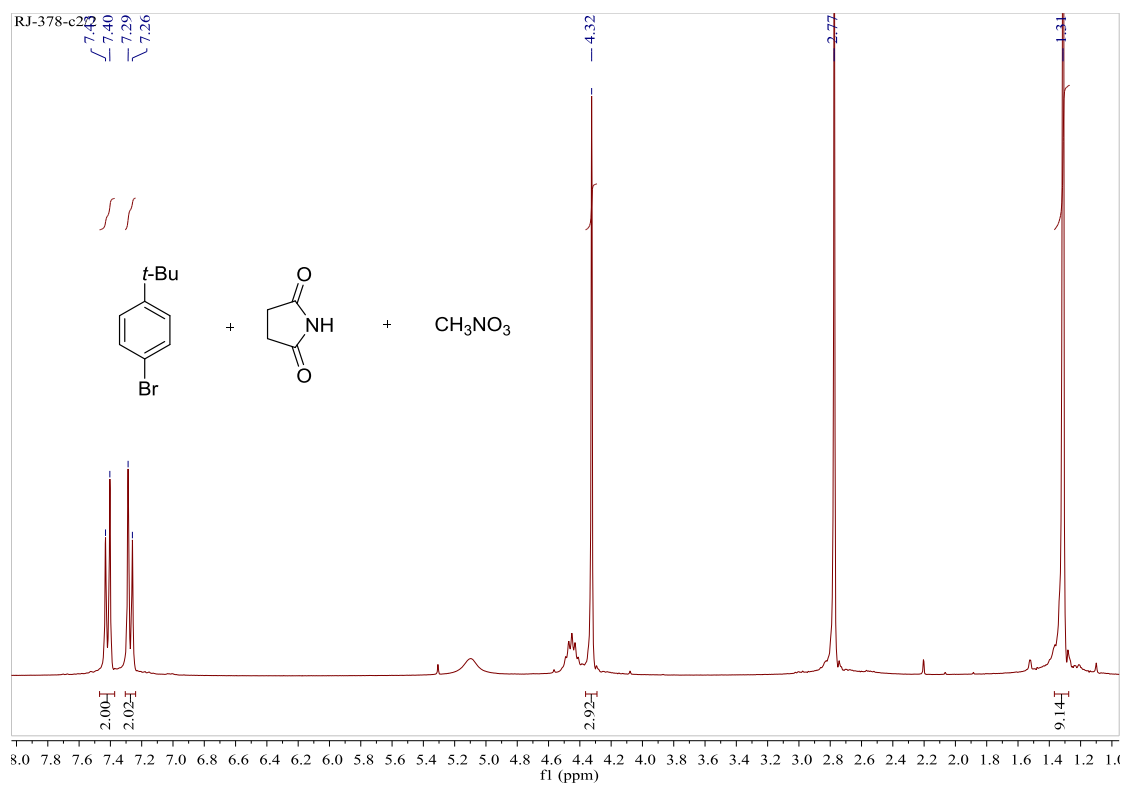

# 1-bromo-2-octylbenzene and 1-bromo-4-octylbenzene (4.8:1)

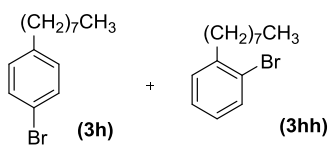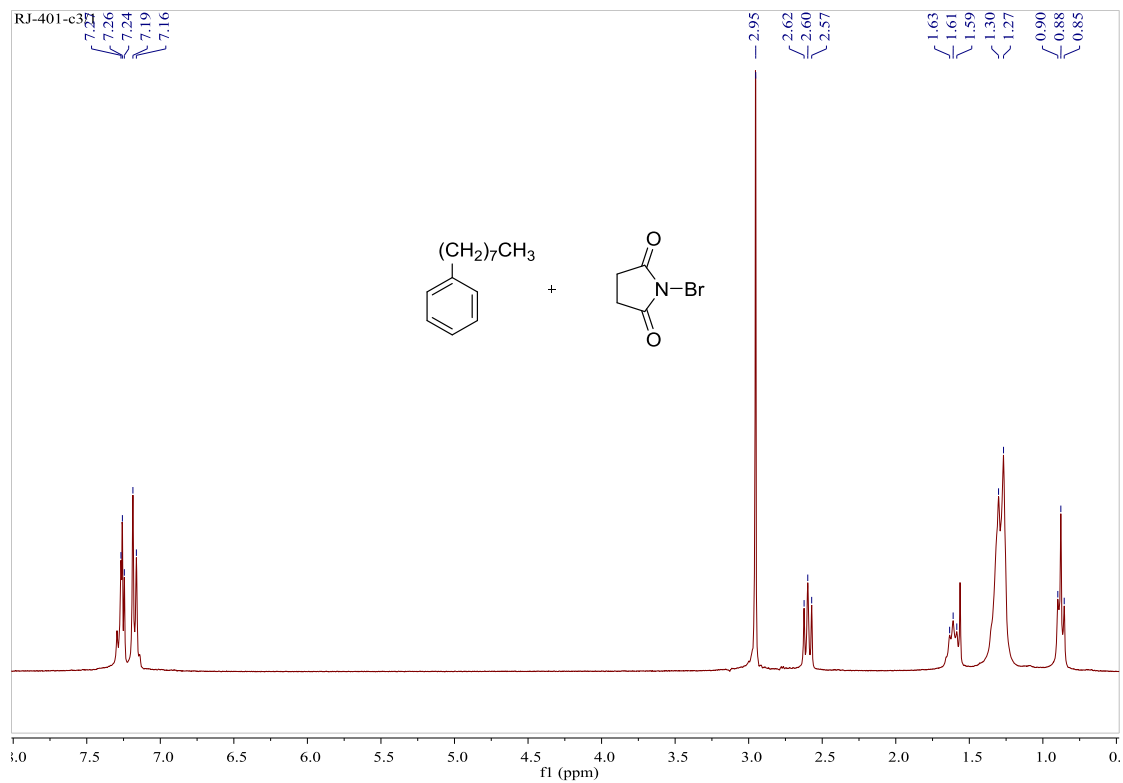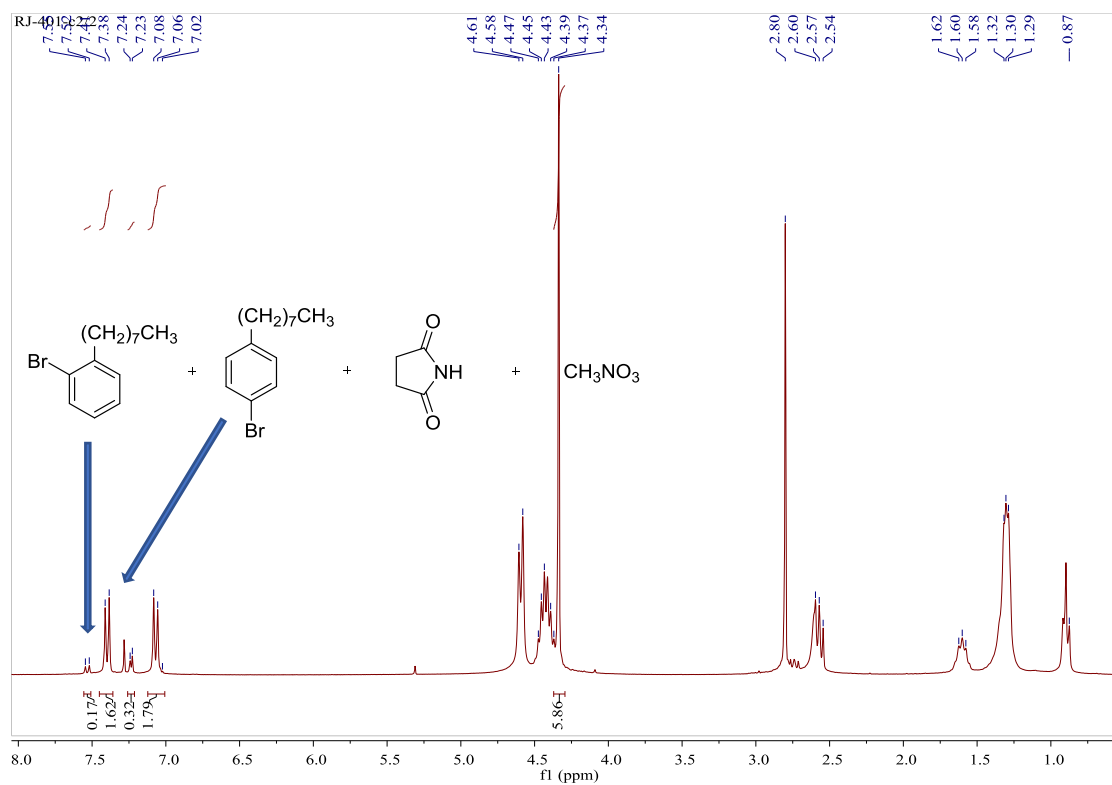

**1-bromo-2-methylbenzene and 1-bromo-4-methylbenzene (3.0:1)**

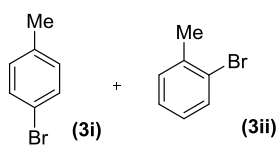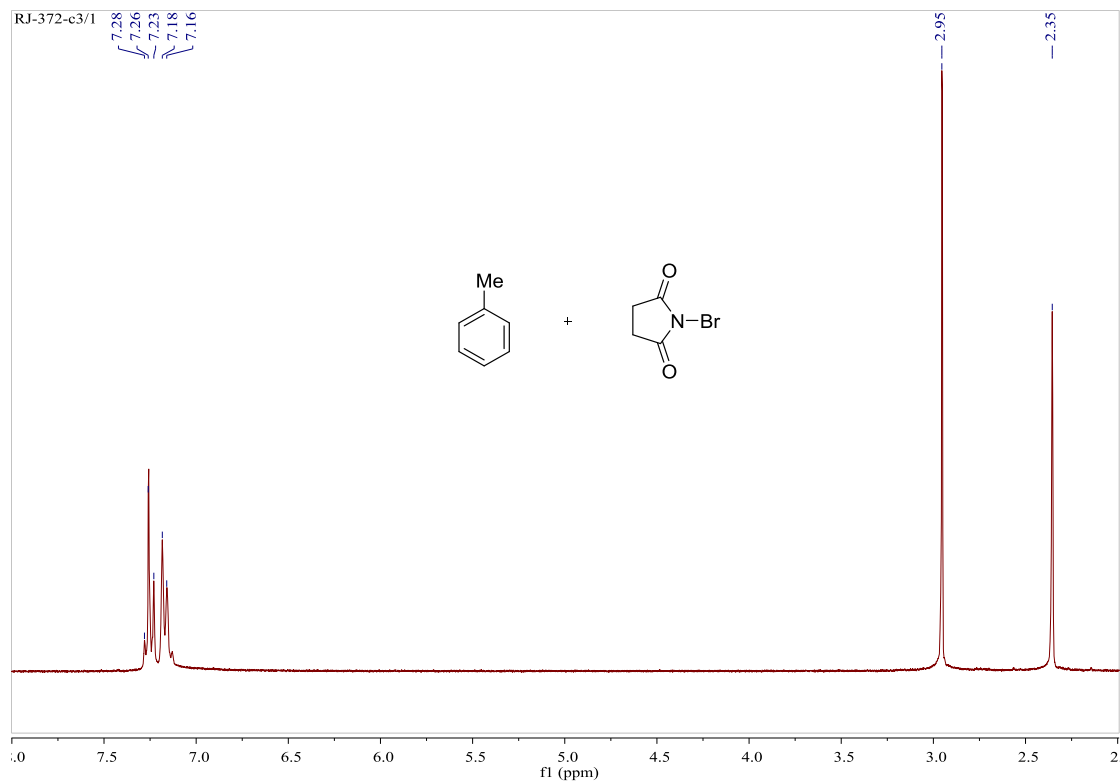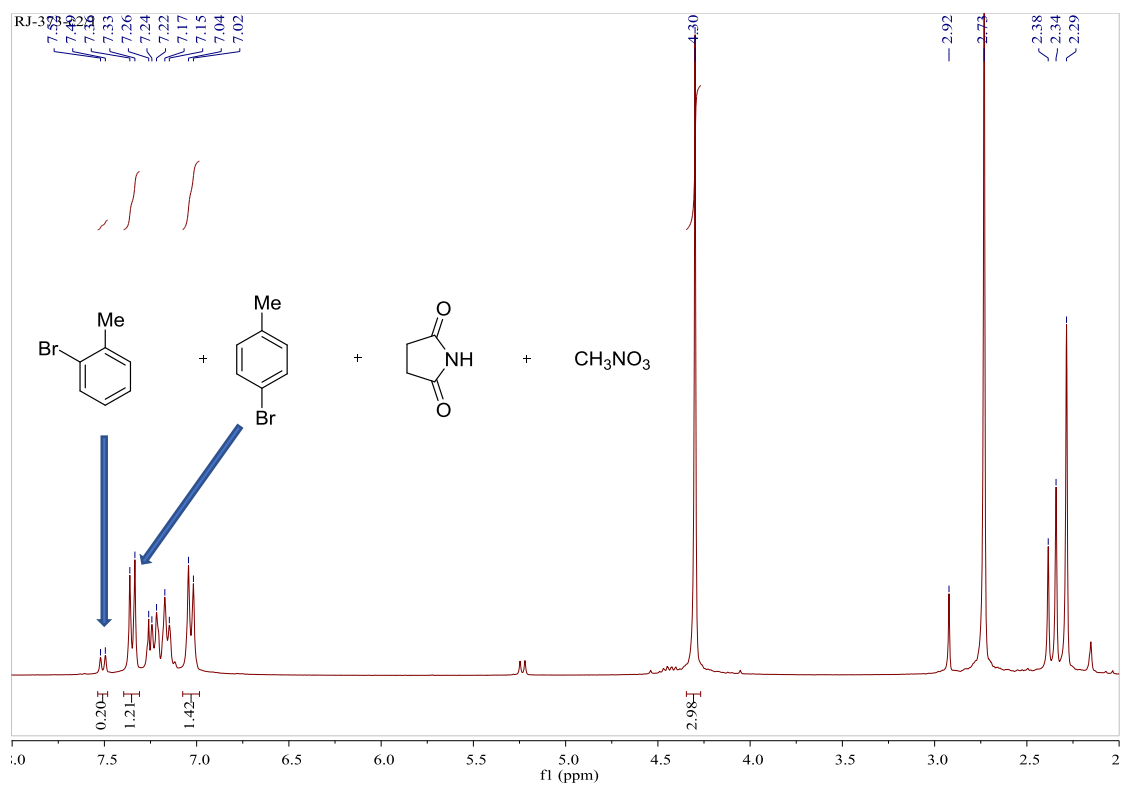

# 1-iodo-2,4-dimethylbenzene

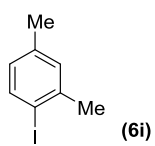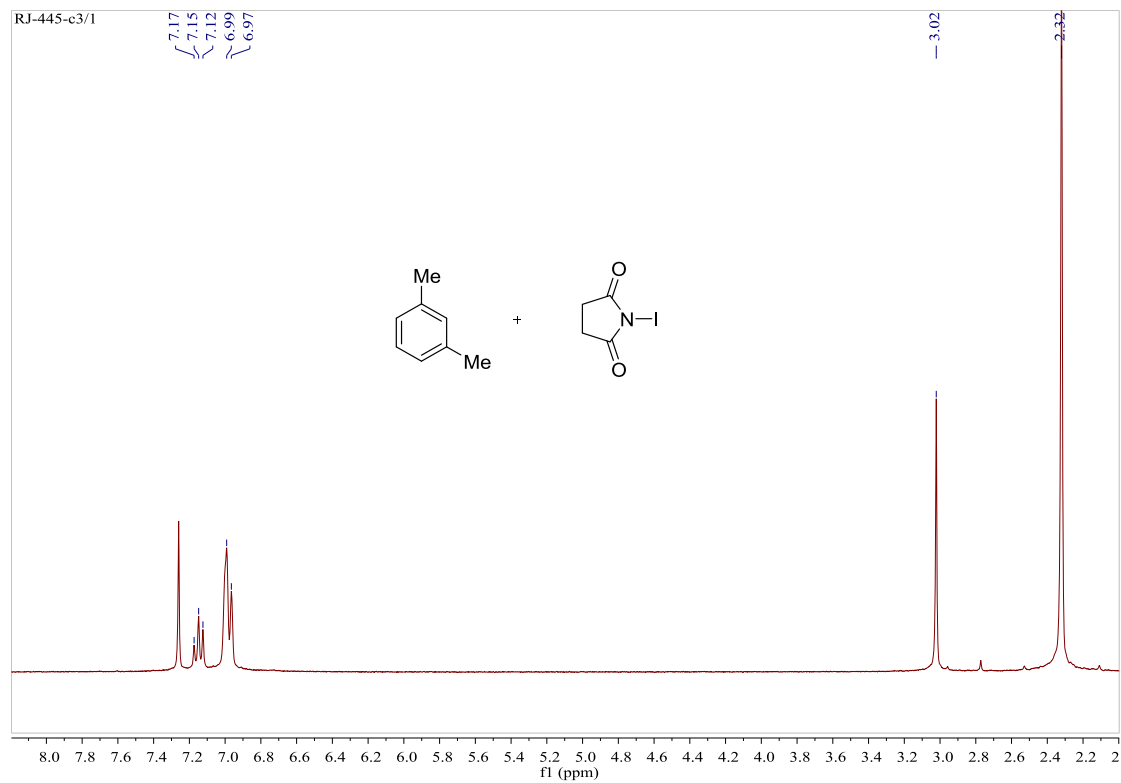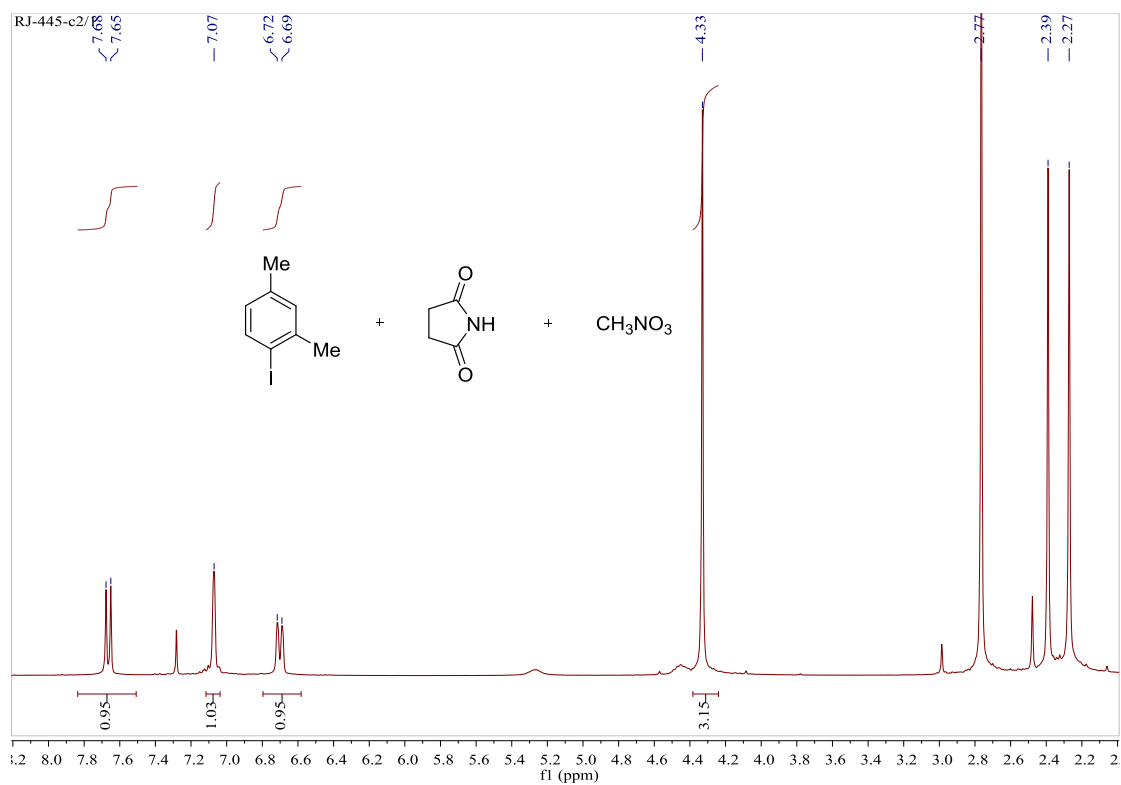

iodonaphthalene and 2-iodonaphthalene (10:1)

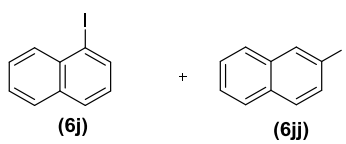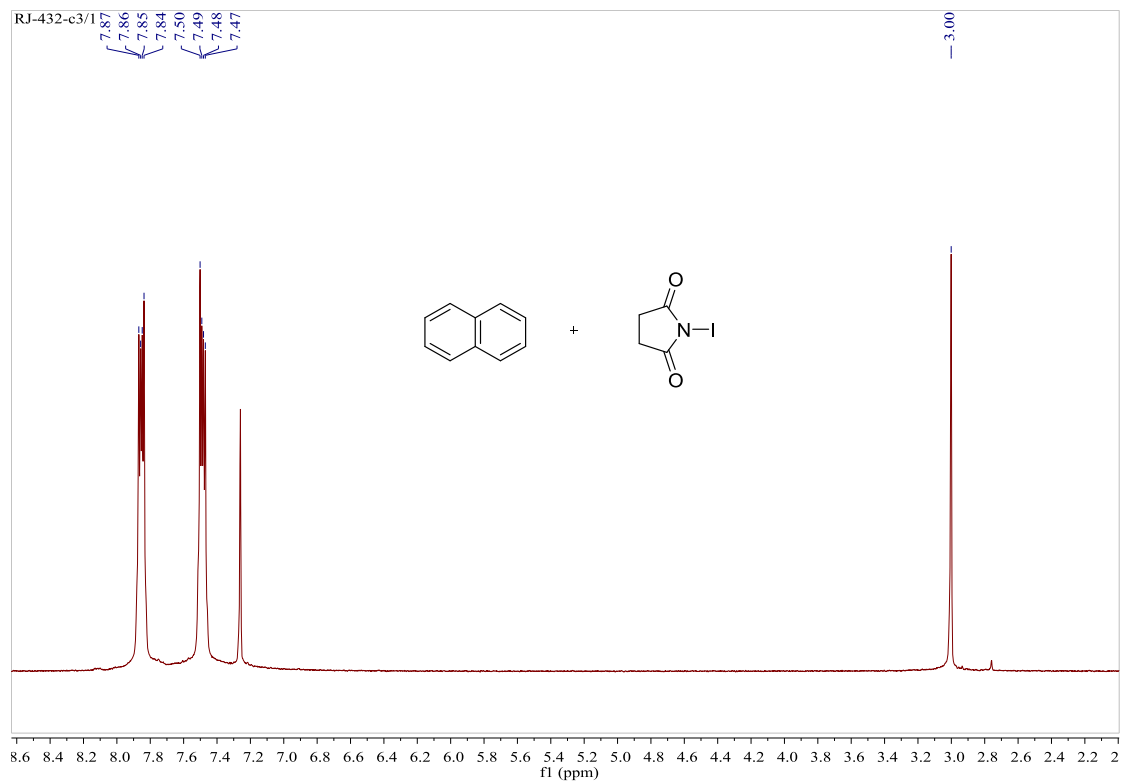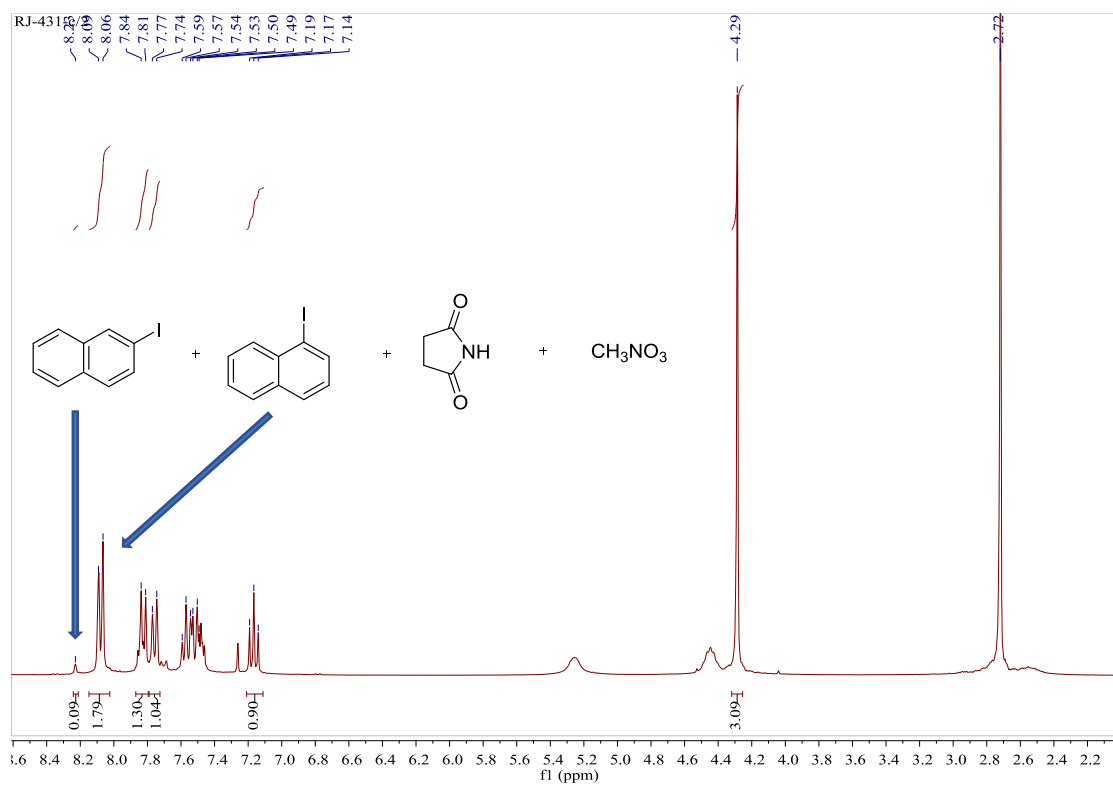

## 2-chloro-1,3,5-trimethylbenzene

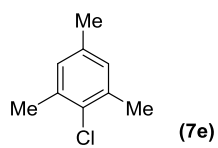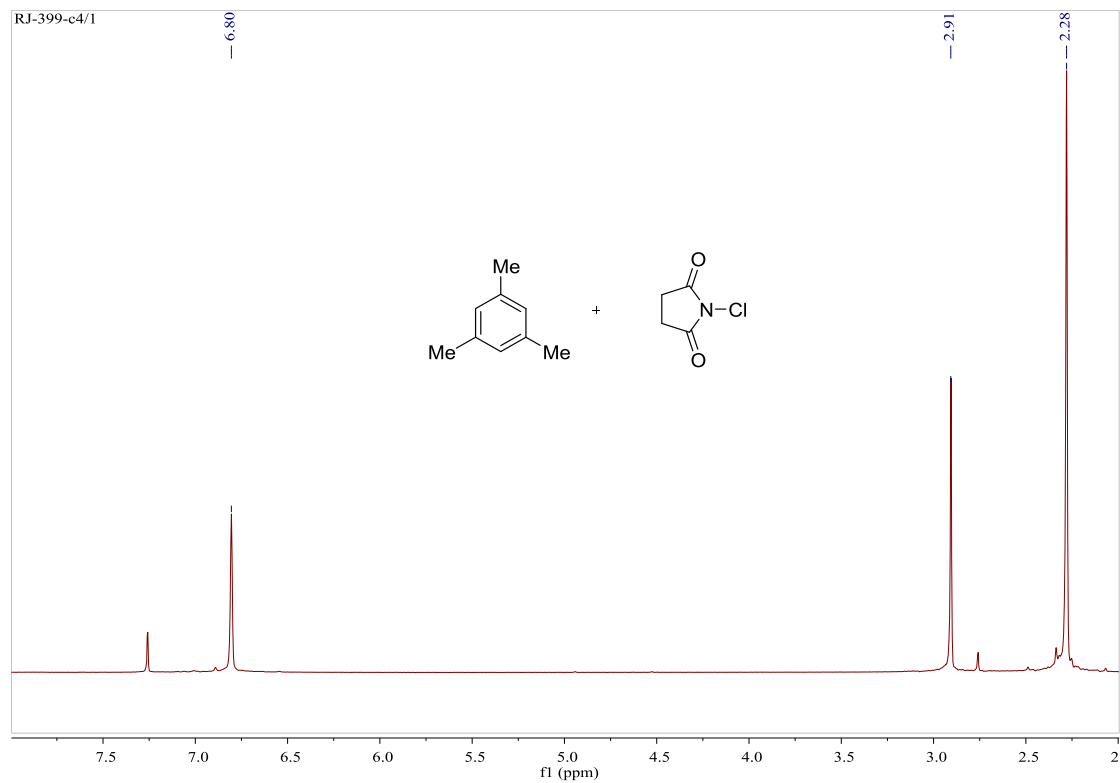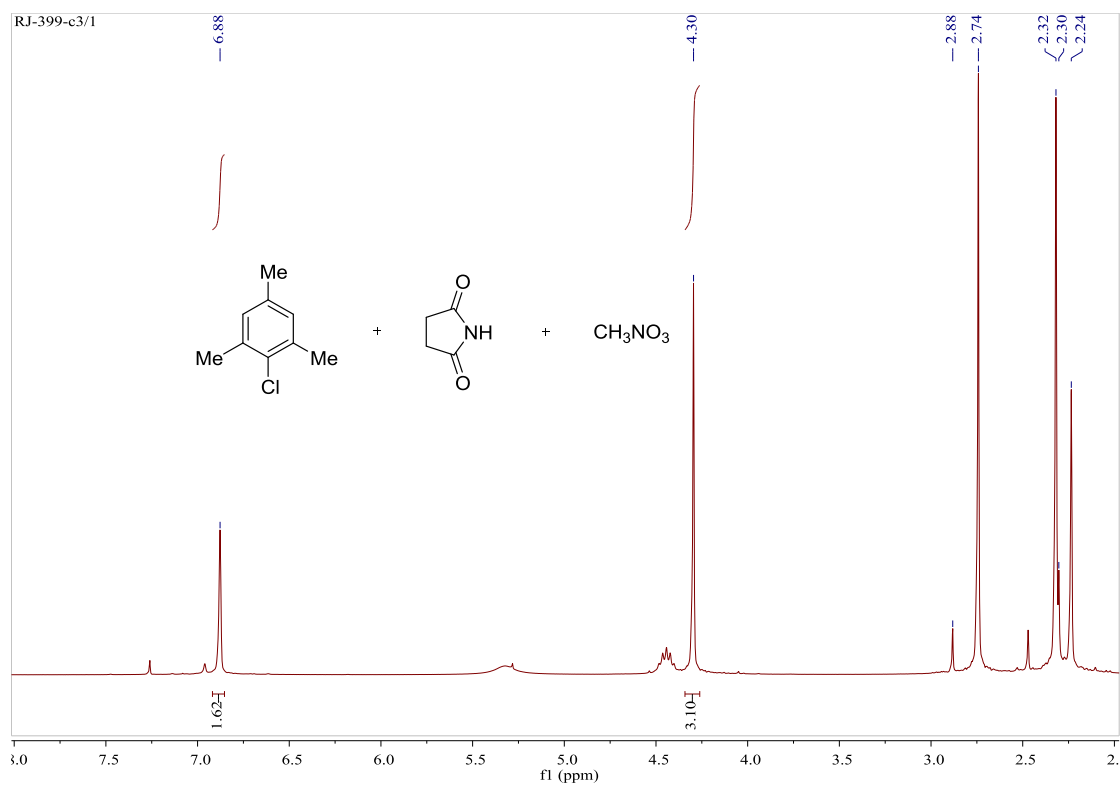

Supplement: Supplementary file 1 [file 10120137]
